# Supplementary material for: Biocatalytic dynamic reductive kinetic resolution of aryl α-chloro β-keto esters: divergent, stereocontrolled synthesis of diltiazem, clentiazem, and siratiazem
Source: Royal Society of Chemistry journal article supplement (doi:10.1039/d2cc03102g), 2022-01-01
Supplement: d2cc03102g1.pdf [file d2cc03102g1.pdf]

## Supporting Information Appendix

### **Biocatalytic Dynamic Reductive Kinetic Resolution of Aryl $\alpha$ -Chloro $\beta$ -Keto Esters: Divergent, Stereocontrolled Synthesis of Diltiazem, Clentiazem, and Siratiazem**

Xiaoping Yue,<sup>1</sup> Yitong Li,<sup>1</sup> Minjie Liu,<sup>2,3</sup> Di Sang,<sup>2,3</sup> Zedu Huang,<sup>2,3\*</sup> and Fener Chen<sup>1,2,3\*</sup>

<sup>1</sup>Sichuan Research Center for Drug Precision Industrial Technology  
West China School of Pharmacy, Sichuan University  
Chengdu, 610041, P. R. China

<sup>2</sup>Engineering Center of Catalysis and Synthesis for Chiral Molecules, Department of  
Chemistry, Fudan University,  
220 Handan Road, Shanghai, 200433, P. R. China  
E-mail: huangzedu@fudan.edu.cn, rfchen@fudan.edu.cn

<sup>3</sup>Shanghai Engineering Research Center of Industrial Asymmetric Catalysis of Chiral  
Drugs,  
220 Handan Road, Shanghai, 200433, P. R. China  
E-mail: huangzedu@fudan.edu.cn; rfchen@fudan.edu.cn

\*Authors to whom correspondence should be addressed

|                                                                                                                                                            |    |
|------------------------------------------------------------------------------------------------------------------------------------------------------------|----|
| Table of Contents .....                                                                                                                                    | 2  |
| General information .....                                                                                                                                  | 4  |
| Protein expression and preparation of cell-free extract (CFE) of enzymes.....                                                                              | 4  |
| Table S1. The details of genes used in this study.....                                                                                                     | 5  |
| Nucleotide and amino acid sequences of LfSDR1.....                                                                                                         | 6  |
| Figure S1. SDS-PAGE analysis of LfSDR1 .....                                                                                                               | 6  |
| Scheme S1. Ketoreductases YDL124w- and CaADH-catalyzed synthesis of <i>syn</i> -(2 <i>S</i> ,3 <i>R</i> )-1a via DYRKR .....                               | 7  |
| Table S2. Screening KREDs for the stereoselective reduction of $\alpha$ -chloro $\beta$ -keto ester 6b .....                                               | 8  |
| Figure S2. Effect of pH on the reaction conversion .....                                                                                                   | 9  |
| Scheme S2. Possible mechanism for the formation of side product S1.....                                                                                    | 10 |
| Figure S3. Effect of temperature on the reaction conversion .....                                                                                          | 11 |
| Figure S4. Effect of the amount of methanol on the reaction conversion .....                                                                               | 12 |
| Figure S5. Effect of the loading of glucose on the reaction conversion .....                                                                               | 13 |
| Figure S6. Effect of substrate concentration on the reaction conversion .....                                                                              | 14 |
| Scheme S3. General procedure for the synthesis of $\alpha$ -chloro $\beta$ -keto esters 6.....                                                             | 15 |
| Scheme S4. Preparative-scale (0.6 mmol) synthesis of <i>anti</i> -(2 <i>S</i> ,3 <i>S</i> )-1 catalyzed by LfSDR1 .....                                    | 19 |
| Scheme S5. Synthesis of $\alpha$ -chloro $\beta$ -keto ester 6b by chlorination of keto ester 8b in flow using chlorine gas generated <i>in situ</i> ..... | 25 |
| Scheme S6. LfSDR1-catalyzed ten-gram scale synthesis of <i>anti</i> -(2 <i>S</i> ,3 <i>S</i> )-1b at a 100 g/L of substrate concentration .....            | 26 |
| Scheme S7. Synthesis of trans methyl (2 <i>R</i> ,3 <i>S</i> )-3-(4-methoxyphenyl) glycidate 9 .....                                                       | 27 |
| Scheme S8. Synthesis of benzothiazepinones 12a .....                                                                                                       | 28 |
| Scheme S9. Synthesis of compound 13a .....                                                                                                                 | 29 |
| Scheme S10. Synthesis of diltiazem (3a).....                                                                                                               | 30 |
| Scheme S11. Synthesis of thiol 10b .....                                                                                                                   | 31 |
| Scheme S12. Synthesis of benzothiazepinones 12b .....                                                                                                      | 32 |
| Scheme S13. Synthesis of compound 13b .....                                                                                                                | 33 |
| Scheme S14. Synthesis of cletiazem (3b) .....                                                                                                              | 34 |
| Scheme S15. Synthesis of amino chloride 14b .....                                                                                                          | 35 |
| Scheme S16. Synthesis of siratiazem (3c) .....                                                                                                             | 36 |
| References .....                                                                                                                                           | 37 |
| <sup>1</sup> H NMR and <sup>13</sup> C NMR Spectra .....                                                                                                   | 38 |

|                                  |           |
|----------------------------------|-----------|
| <b>Chiral HPLC Spectra .....</b> | <b>78</b> |
|----------------------------------|-----------|

### **General information**

Unless otherwise specified, all reagents and solvents were purchased from commercial sources and used as received. Codon-optimized synthetic genes (pET22b-LaADH and pET28a-LfSDR1) were purchased from Genewiz (China) (Table S1). The rest of the enzymes listed in Table S1 were prepared as we previously described.<sup>[1,2]</sup> Chemically competent cells of *E. coli* BL21 (DE3) were purchased from Weidi Biotech (Shanghai, China). LB medium contained yeast extract (5 g/L), tryptone (10 g/L), NaCl (10 g/L). Melting points were measured using an MP450 fully automatic melting-point apparatus. NMR spectra were recorded on a Bruker Avance 400 spectrometer in CDCl<sub>3</sub> or DMSO-d<sub>6</sub> using tetramethylsilane (TMS) as the internal standard. Coupling constant (*J*) values are given in Hz. Optical rotations were measured by a Rudolph AUTOPOL I Automatic Polarimeter. HRMS were recorded on a Bruker micrOTOF spectrometer. Chiral-HPLC analysis was performed with Daicel Chiralpak IA column (25 cm × 4.6 mm × 5 μm), Chiralpak IF column (25 cm × 4.6 mm × 5 μm), and Chiracel OJ-H column (25 cm × 4.6 mm × 5 μm).

### **Protein expression and preparation of cell-free extract (CFE) of enzymes**

An approximately 12 h culture of *E. coli* BL21 (DE3) cells freshly transformed with the appropriate plasmid and grown in LB medium supplemented with kanamycin (50 μg/mL) or ampicillin (100 μg/mL) was diluted 1:100 into 0.5 L of the same medium in a 2 L flask. The culture was shaken at 37 °C until the optical density at 600 nm reached 0.6-0.8, and then the flask was placed in an ice/water bath for 30 minutes before the addition of isopropylthio-β-D-galactoside (IPTG) to a final concentration of 0.1 mM. The culture was shaken for an additional 16-18 h at 18 °C. The cells were collected by centrifugation and then resuspended in an appropriate amount of NaP<sub>i</sub> buffer to make a 15% w/v suspension. The cells were lysed by sonication on ice, and debris was removed by centrifugation at 15 000 rpm for 30 minutes at 4 °C. This collected supernatant (cell-free extract (CFE)) was used as the biocatalyst. To quantify the cell-free extract, a portion of the cell-free extract similarly prepared in water was lyophilized and weighed, and thus obtained information was used as the reference for the calculation of the enzyme loading (g/L).

**Table S1. The details of genes used in this study.**

| Name      | Accession No.  | Source                                 | aa  |
|-----------|----------------|----------------------------------------|-----|
| RasADH    | EU485985       | <i>Ralstonia</i> sp. DSMZ 6428         | 250 |
| KmCR2     | XP_022675166.1 | <i>Kluyveromyces marxianus</i> CBS4857 | 341 |
| YCR107w   | NP_010032.1    | <i>Saccharomyces cerevisiae</i>        | 363 |
| KRED-F42  | WP_023468191.1 | <i>Exiguobacterium</i> sp. MH3         | 249 |
| KdoADH    | CDO95209.1     | <i>Kluyveromyces dobzhanskii</i>       | 342 |
| LaADH     | WP_021765610.1 | <i>Leifsonia aquatica</i>              | 283 |
| SyADH     | EU427523.1     | <i>Sphingobium yanoikuyae</i>          | 263 |
| YNL331c   | NP_014068.1    | <i>Saccharomyces cerevisiae</i>        | 376 |
| YBR149w   | NP_009707.3    | <i>Saccharomyces cerevisiae</i>        | 344 |
| YJR096w   | NP_012630.1    | <i>Saccharomyces cerevisiae</i>        | 282 |
| YNL274c   | NP_014125.1    | <i>Saccharomyces cerevisiae</i>        | 350 |
| KRED-Pglu | AKP95857.1     | <i>Pichia glucozyma</i>                | 252 |
| KRED-Bt   | WP_103592444.1 | <i>Bacillus thuringiensis</i>          | 253 |
| BYueD     | WP_134982026.1 | <i>Bacillus subtilis</i>               | 243 |
| LkADH     | WP_054768785.1 | <i>Lactobacillus kefir</i>             | 252 |
| KpADH     | XP_001644505.1 | <i>Kluyveromyces polyspora</i>         | 342 |
| LtCR      | XP_002554048.1 | <i>Lachancea thermotolerans</i>        | 281 |
| CgCR      | XP_447302.1    | <i>Candida glabrata</i>                | 310 |
| LfSDR1    | WP_015638890.1 | <i>Lactobacillus fermentum</i>         | 247 |
| ChKRED20  | AHC30841.1     | <i>Chryseobacterium</i> sp. CA49       | 244 |

**Nucleotide sequence of LfSDR1 (codon optimized for expression in *E. coli*)**

ATGGGTCAGTTCGATAACAAAGTGGCTTTAGTGACTGGTGGTACCAAAGGTATTGG  
TTTAGCAATTGCCGAAGTGTAAAAAGGAAGGTGCCAAAGGCGTTGCCTTTACCG  
GTCGTCACGAAGATGAAGGCAAAGCCGTGCAAGAACGTTTAGGTGAACGCTCTTT  
ATTTATTACCCAAGATGTGAGCAAAGAAGAAGACTGGCAGAACGCAACCAAAGCA  
GTGGTGGACAAGTTCGGTCAGCTGGATGCCATCGTGAATAACGCCGGCATTGGCA  
CCCCGCTGGGCATTGAAGAGATGACTTTAGATCACTGGAACCGTGAAATCGCCATC  
GATCTGACCGGTACCATGCTGGGTTGCAAATATGGCGTGAAGGCCATGAAGGAGC  
ATGGTGGTGCCATTGTGAACATCAGCAGCATCGAAGGTATGATCGGCGATCCGACC  
GTGCCGGCATAAATGCCGCAAAGGTGGCGTGCGTTTACTGACCAAGAGCGTTG  
CTTTAGAATGCGCCGAAAAGGGCTACGCCATCCGCGTTAATAGCATCTATCCGGGC  
GTGATCGCCACCCCGCTGATCGACCATCTGGACGACGCAACCAAACAGTTTTATAT  
TGATAAACATCCGATGGGTCGTTTAGGTAAACCGGAAGAGGTTGCCAAAATGGCC  
GTGTTTCGTTGCCAGTGATGGTGGCAGCTTTAGCACCGGCAGCGAATTTGTGGTGG  
CGGTGGTTATACCGCCCAGTAA

**Amino acid sequence of LfSDR1**

MGQFDNKVALVTGGTKGIGLAI AELFLKEGAKGVAFTGRHEDEGKAVQERLGERSLFI  
TQDVSKEEDWQNATKAVVDKFGQLDAIVN NAGIGTPLGIEEMTLDHWNR EIAIDLTG  
TMLGCKYGVKAMKEHGGAI VNISSIEGMIGDPTVPAYNA AKGGVRL LTKSVALECAE  
KGYAIRVNSIYPGVIATPLIDHLDDATKQFYIDKHPMGR LGKPEEVAKMAV FVASDGA  
SFSTGSEFVVDGGYTAQ

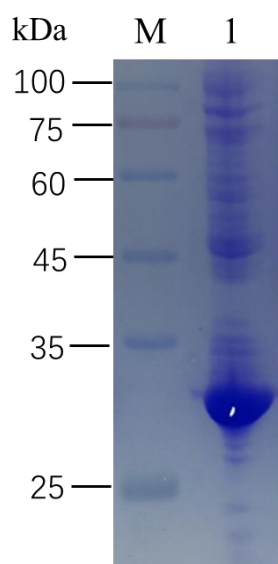

**Figure S1. SDS-PAGE analysis of LfSDR1.** Coomassie staining. M: RealBand 3-color Regular Range Protein Marker (Sangon Biotech, China). Lane 1: soluble cell fraction of LfSDR1.

Stewart's work: ketoreductase YDL124w-catalyzed DYRKR

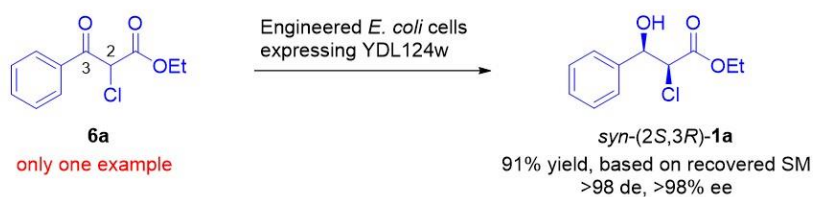

Berkowitz's work: ketoreductase CaADH-catalyzed DYRKR

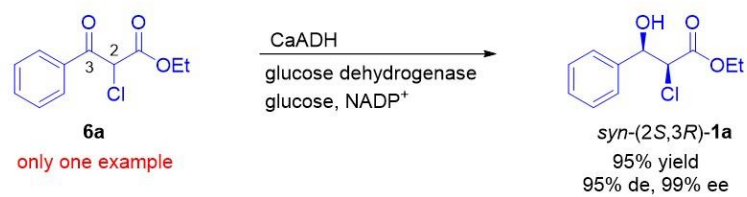

**Scheme S1. Ketoreductases YDL124w- and CaADH-catalyzed synthesis of *syn*-(2*S*,3*R*)-1a via DYRKR.**

**Table S2. Screening KREDs for the stereoselective reduction of  $\alpha$ -chloro  $\beta$ -keto ester **6b**.<sup>a</sup>**

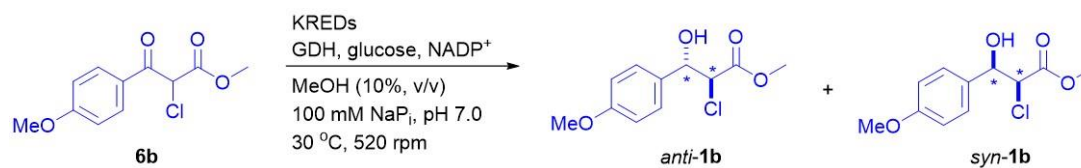

| Entry | Enzyme    | Conv. (%) <sup>b</sup> | Isomer I (%) <sup>c</sup> | Isomer II (%) <sup>c</sup> | Isomer III (%) <sup>c</sup> | Isomer IV (%) <sup>c</sup> | dr ( <i>anti:syn</i> ) <sup>c</sup> | ee <i>anti</i> (%) <sup>c</sup> | ee <i>syn</i> (%) <sup>c</sup> |
|-------|-----------|------------------------|---------------------------|----------------------------|-----------------------------|----------------------------|-------------------------------------|---------------------------------|--------------------------------|
| 1     | RasADH    | 88.9                   | 88.48                     | 0.83                       | 1.62                        | 9.07                       | 8.4:1                               | 98.1                            | 69.7                           |
| 2     | KmCR2     | 98.4                   | 47.70                     | 0.37                       | 21.40                       | 30.53                      | 1:1.1                               | 98.5                            | 17.6                           |
| 3     | YCR107w   | 7.0                    | 0                         | 100                        | 0                           | 0                          | >99:1                               | >99                             | /                              |
| 4     | KRED-F42  | 92.0                   | 9.29                      | 4.65                       | 0.26                        | 85.80                      | 1:6.2                               | 33.3                            | >99                            |
| 5     | KdoADH    | 93.0                   | 11.33                     | 39.98                      | 5.92                        | 42.77                      | 1:1.1                               | 55.8                            | 75.7                           |
| 6     | LaADH     | <5.0                   |                           |                            |                             | n.d. <sup>d</sup>          |                                     |                                 |                                |
| 7     | SyADH     | <5.0                   |                           |                            |                             | n.d.                       |                                     |                                 |                                |
| 8     | YNL331c   | 10.0                   | 15.33                     | 22.61                      | 47.15                       | 14.91                      | 1:1.6                               | 19.2                            | 46.8                           |
| 9     | YBR149w   | 21.2                   | 1.41                      | 14.50                      | 84.09                       | 0                          | 1:5.3                               | 82.3                            | >99                            |
| 10    | YJR096w   | <5.0                   |                           |                            |                             | n.d.                       |                                     |                                 |                                |
| 11    | YNL274c   | <5.0                   |                           |                            |                             | n.d.                       |                                     |                                 |                                |
| 12    | KRED-Pglu | <5.0                   |                           |                            |                             | n.d.                       |                                     |                                 |                                |
| 13    | KRED-Bt   | 18.3                   | 27.75                     | 0.67                       | 0.14                        | 71.44                      | 1:2.5                               | 95.3                            | >99                            |
| 14    | BYueD     | 11.0                   | 15.68                     | 52.86                      | 0                           | 31.46                      | 2.2:1                               | 54.2                            | >99                            |
| 15    | LkADH     | 75.0                   | 3.04                      | 74.99                      | 2.57                        | 19.40                      | 3.6:1                               | 92.2                            | 76.6                           |
| 16    | KpADH     | 13.5                   | 2.79                      | 92.23                      | 2.26                        | 2.72                       | 19.1:1                              | 94.1                            | n.d.                           |
| 17    | LtCR      | 7.0                    | 33.49                     | 12.24                      | 51.21                       | 3.06                       | 1:1.2                               | 46.5                            | 88.7                           |
| 18    | CgCR      | 6.0                    | 16.00                     | 61.00                      | 7.50                        | 15.50                      | 3.3:1                               | 58.4                            | 34.8                           |
| 19    | LfSDR1    | 98.0                   | 0.73                      | 97.24                      | 0.92                        | 1.11                       | 48.2:1                              | 98.5                            | n.d.                           |
| 20    | ChKRED20  | 65.9                   | 70.39                     | 14.49                      | 0.96                        | 14.16                      | 5.6:1                               | 65.9                            | 87.3                           |

<sup>a</sup> A reaction mixture (60 mL) composed of **6b** (10 mM), glucose (20 mM), NADP<sup>+</sup> (0.2 mM), 10 mL 15% (w/v) cell-free extract (CFE) of KREDs in NaP<sub>i</sub> buffer (100 mM, pH 7.0), 1 mL 15% (w/v) CFE of GDH in NaP<sub>i</sub> buffer (100 mM, pH 7.0), 6 mL MeOH, and 43 mL NaP<sub>i</sub> buffer (100 mM, pH 7.0) was stirred at 30 °C with 520 rpm for 12 h. <sup>b</sup> The conversions were determined based on uncorrected integrals of UV/Vis responses of the products and substrate in HPLC analysis using a chiral stationary phase. <sup>c</sup> The percentages of different product isomers, dr, and ee values were determined and calculated based on uncorrected integrals of UV/Vis responses in HPLC analysis using a chiral stationary phase. <sup>d</sup> n.d.: not determined.



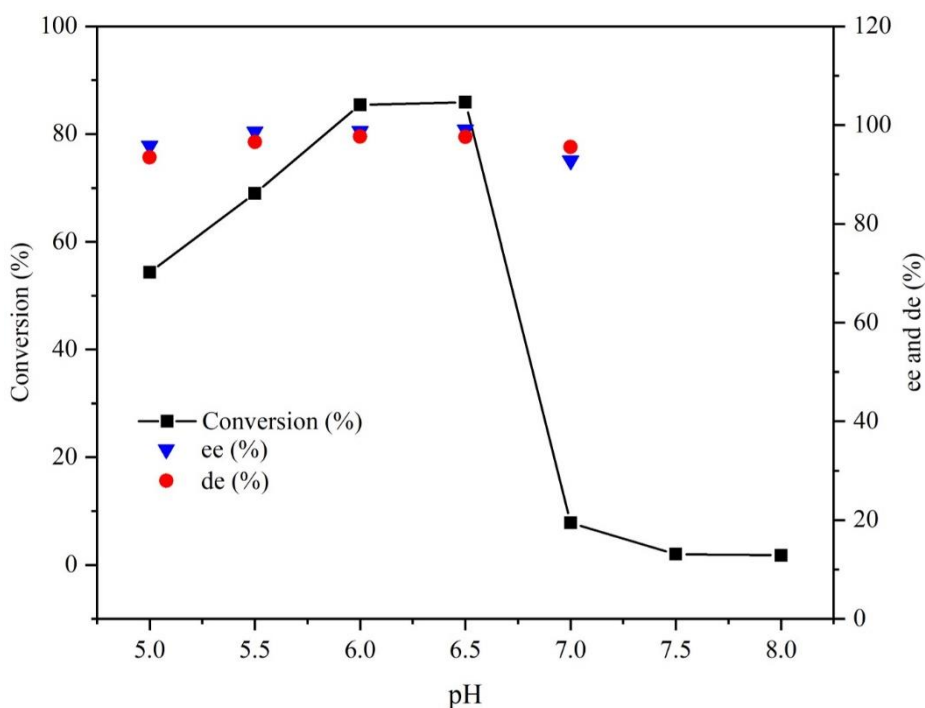

**Figure S2. Effect of pH on the reaction conversion.** Reaction conditions (60 mL): **6b** (10 mM), glucose (20 mM), NADP<sup>+</sup> (0.2 mM), 10 mL of 15% (w/v) cell-free extract (CFE) of LfSDR1 in NaP<sub>i</sub> buffer (100 mM, pH 7.0), 0.2 mL of 15% (w/v) CFE of GDH in NaP<sub>i</sub> buffer (100 mM, pH 7.0), and 6 mL of MeOH, in 43 mL of different buffers, including 100 mM sodium citrate buffer (pH 5.0, 5.5, and 6.0), 100 mM NaP<sub>i</sub> buffer (pH 6.5, 7.0, and 7.5), and 100 mM Tris buffer (pH 8.0). Reaction mixtures were incubated at 30 °C with 520 rpm stirring for 1.5 h. Each data point represents the mean result of duplicate assays.

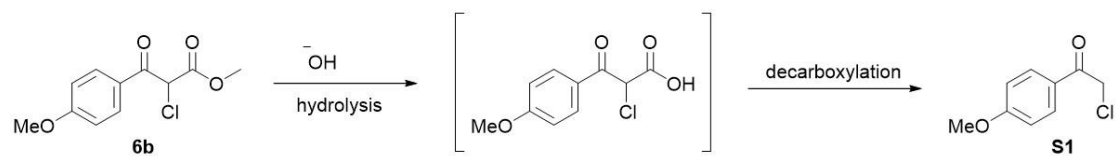

**Scheme S2. Possible mechanism for the formation of side product S1.**

**2-chloro-1-(4-methoxyphenyl)ethan-1-one (S1)**

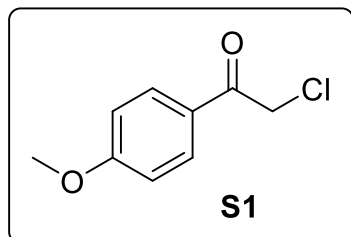

Pale yellow oil.  $^1\text{H NMR}$  (400 MHz,  $\text{CDCl}_3$ )  $\delta$  7.99-7.91 (m, 2H), 7.00-6.93 (m, 2H), 4.66 (s, 2H), 3.89 (s, 3H).  $^{13}\text{C NMR}$  (101 MHz,  $\text{CDCl}_3$ )  $\delta$  189.7, 164.2, 131.0, 127.2, 114.1, 55.6, 45.7.

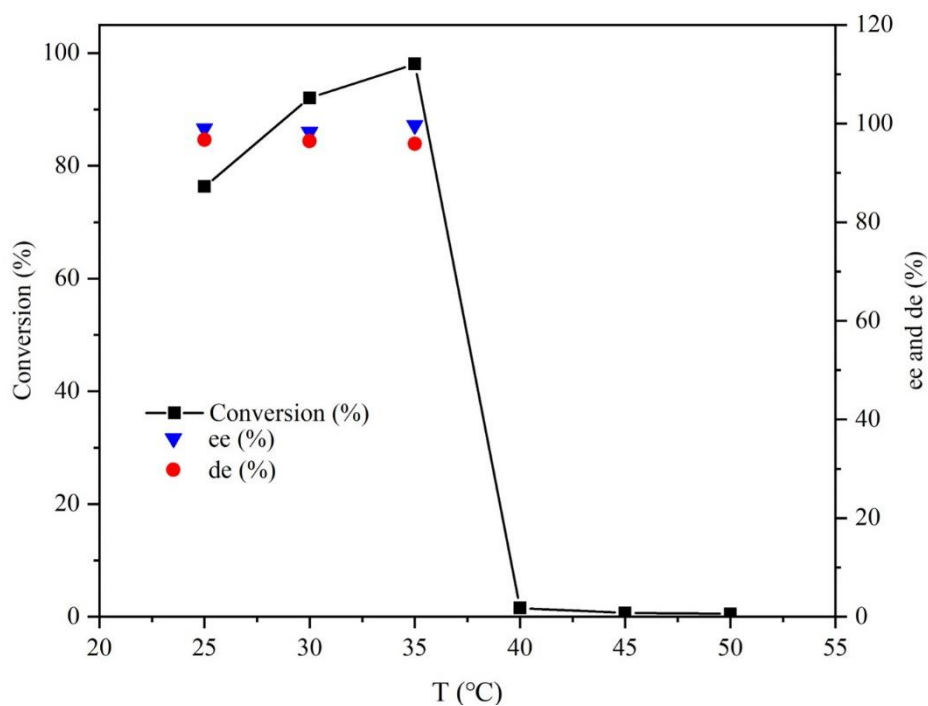

**Figure S3. Effect of temperature on the reaction conversion.** Reaction conditions (60 mL): **6b** (10 mM), glucose (20 mM), NADP<sup>+</sup> (0.2 mM), 10 mL of 15% (w/v) CFE of LfSDR1 in NaP<sub>i</sub> buffer (100 mM, pH 6.5), 0.2 mL of 15% (w/v) CFE of GDH in NaP<sub>i</sub> buffer (100 mM, pH 6.5), and 6 mL of MeOH, in 43 mL of NaP<sub>i</sub> buffer (100 mM, pH 6.5). Reaction mixtures were incubated at different temperatures with 520 rpm stirring for 1.5 h. Each data point represents the mean result of duplicate assays.

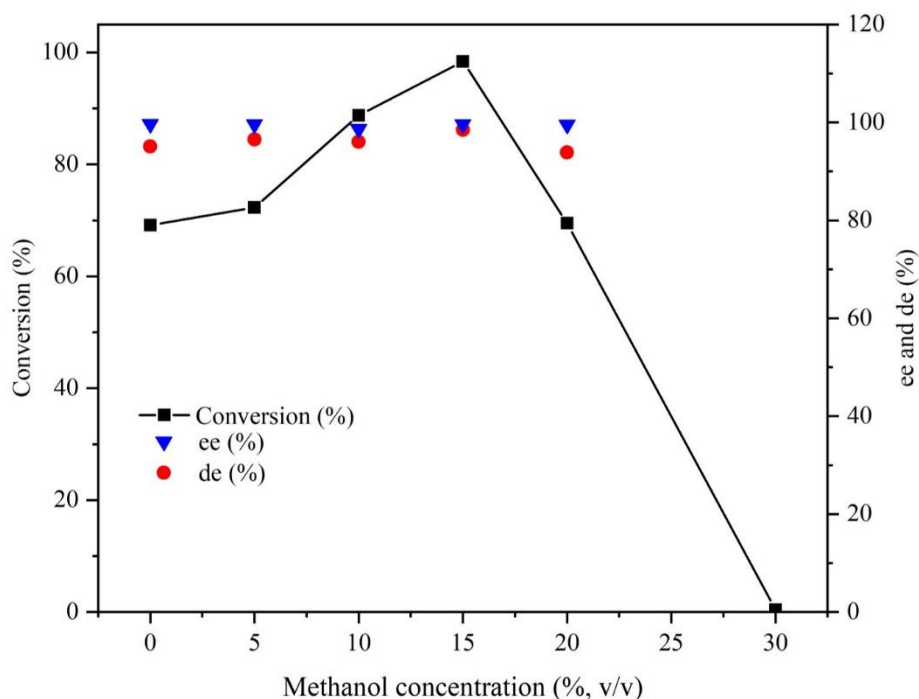

**Figure S4. Effect of the amount of methanol on the reaction conversion.** Reaction conditions (60 mL): **6b** (10 mM), glucose (20 mM), NADP<sup>+</sup> (0.2 mM), 10 mL of 15% (w/v) CFE of LfSDR1 in NaP<sub>i</sub> buffer (100 mM, pH 6.5), 0.2 mL of 15% (w/v) CFE of GDH in NaP<sub>i</sub> buffer (100 mM, pH 6.5), and 0 to 18 mL of MeOH, in 32 to 50 mL of NaP<sub>i</sub> buffer (100 mM, pH 6.5). Reaction mixtures were incubated at 35 °C with 520 rpm stirring for 1.5 h. Each data point represents the mean result of duplicate assays.

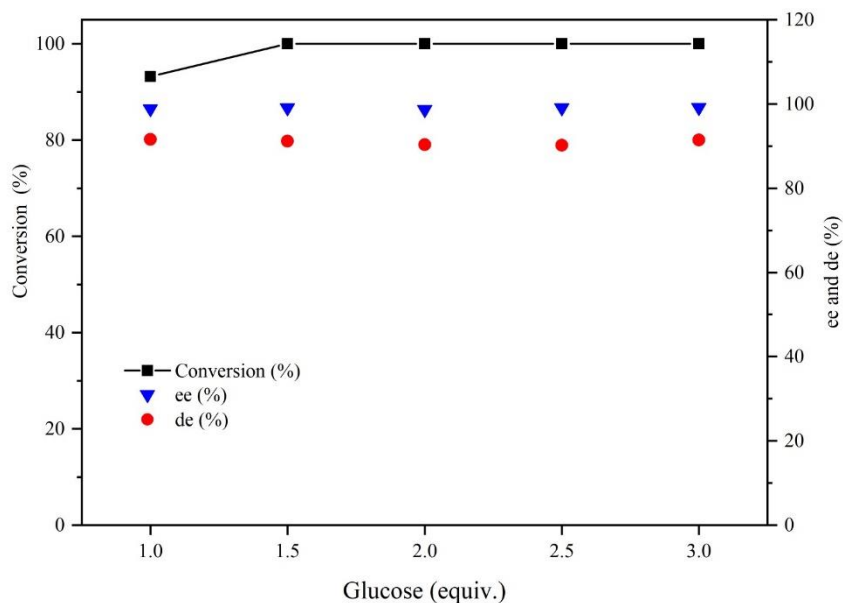

**Figure S5. Effect of the loading of glucose on the reaction conversion.** Reaction conditions (60 mL): **6b** (10 mM), glucose (10 to 30 mM), NADP<sup>+</sup> (0.2 mM), 10 mL of 15% (w/v) CFE of LfSDR1 in NaP<sub>i</sub> buffer (100 mM, pH 6.5), 0.2 mL of 15% (w/v) CFE of GDH in NaP<sub>i</sub> buffer (100 mM, pH 6.5), and 9 mL of MeOH, in 41 mL of NaP<sub>i</sub> buffer (100 mM, pH 6.5). Reaction mixtures were incubated at 35 °C with 520 rpm stirring for 1.5 h. Each data point represents the mean result of duplicate assays.

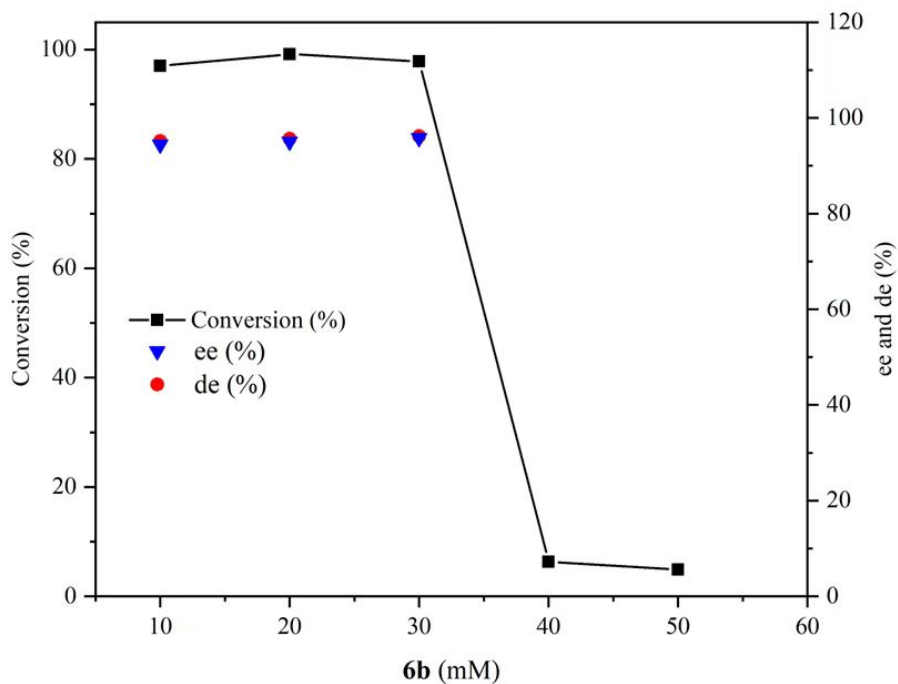

**Figure S6. Effect of substrate concentration on the reaction conversion.** Reaction conditions (60 mL): **6b** (10 to 50 mM), glucose (1.5 equiv. relative to **6b**), NADP<sup>+</sup> (0.2 mM), 10 mL of 15% (w/v) CFE of LfSDR1 in NaP<sub>i</sub> buffer (100 mM, pH 6.5), 0.2 mL of 15% (w/v) CFE of GDH in NaP<sub>i</sub> buffer (100 mM, pH 6.5), and 9 mL of MeOH, in 41 mL of NaP<sub>i</sub> buffer (100 mM, pH 6.5). Reaction mixtures were incubated at 35 °C with 520 rpm stirring for 1.5 h. Each data point represents the mean result of duplicate assays.

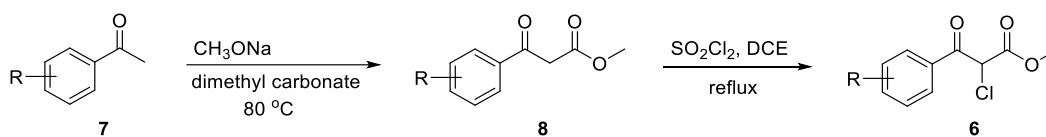

**Scheme S3. General procedure for the synthesis of  $\alpha$ -chloro  $\beta$ -keto esters **6**.<sup>[3]</sup>**

This is a modified literature procedure.<sup>[3]</sup> A mixture of  $\text{CH}_3\text{ONa}$  (0.81 g, 15 mmol, 1.5 equiv.) and dimethyl carbonate (12 mL) was stirred for 10 minutes at room temperature and then heated at reflux, and a solution of **7** (10 mmol) in dimethyl carbonate (3 mL) was added dropwise over 4 h. After refluxing for 2 h at 80 °C, the reaction was cooled down and neutralized by HCl (4 N). The organic layer was separated and the aqueous layer was extracted with ethyl acetate. The combined organic layers were dried with anhydrous  $\text{Na}_2\text{SO}_4$ , concentrated *in vacuo* to give keto ester **8**, which was used directly in the next step without further purification.

A mixture of **8** and 1,2-dichloroethane (15 mL) was stirred for 15 minutes at room temperature and then heated at reflux, and sulfuryl chloride (10 mmol, 1.0 equiv.) was added dropwise over 2 h. The mixture was then cooled down, and quenched in ice water and the solvent was evaporated. The residue was purified by column chromatography on silica gel (petroleum ether/ethyl acetate = 5:1) to give  $\alpha$ -chloro  $\beta$ -keto ester **6**.

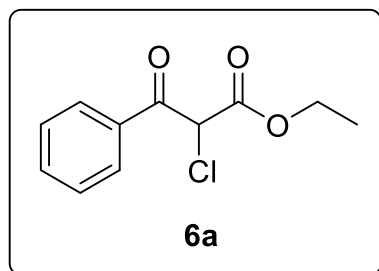

**Ethyl 2-chloro-3-oxo-3-phenylpropanoate (6a)** was prepared in 88% yield (1.98 g) as pale yellow oil starting directly from 10 mmol of **8a**.  $^1\text{H NMR}$  (400 MHz,  $\text{CDCl}_3$ )  $\delta$  8.03-7.98 (m, 2H), 7.68-7.60 (m, 1H), 7.56-7.47 (m, 2H), 5.61 (s, 1H), 4.29 (q,  $J = 7.1$  Hz, 2H), 1.24 (t,  $J = 7.1$  Hz, 3H).  $^{13}\text{C NMR}$  (100 MHz,  $\text{CDCl}_3$ )  $\delta$  188.4, 165.4, 134.5, 133.5, 129.4, 129.1, 63.4, 58.1, 14.0. **HRMS** (ESI,  $m/z$ ) calcd for  $\text{C}_{11}\text{H}_{12}\text{ClO}_3$  [ $\text{M} + \text{H}$ ] $^+$  227.0469, found 227.0470.

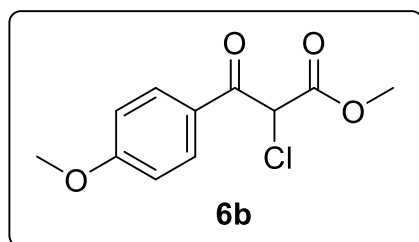

**Methyl 2-chloro-3-(4-methoxyphenyl)-3-oxopropanoate (6b)** was prepared in 98% yield (66.9 g) as white solid starting from 280 mmol of **7b**. **m.p.** = 44-45 °C.  $^1\text{H NMR}$  (400 MHz,  $\text{CDCl}_3$ )  $\delta$  8.00 (d,  $J = 9.0$  Hz, 2H), 6.98 (d,  $J = 9.0$  Hz, 2H), 5.63 (s, 1H), 3.90 (s, 3H), 3.84 (s, 3H).  $^{13}\text{C NMR}$  (100 MHz,  $\text{CDCl}_3$ )  $\delta$  186.7, 166.0, 164.6, 131.8, 126.1, 114.2, 57.6, 55.7, 53.8. **HRMS** (ESI,  $m/z$ ) calcd for  $\text{C}_{11}\text{H}_{12}\text{ClO}_4$  [ $\text{M} + \text{H}$ ] $^+$  243.0419, found 243.0420.

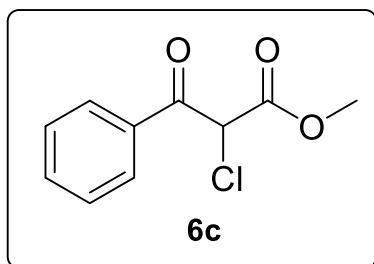

**Methyl 2-chloro-3-oxo-3-phenylpropanoate (6c)** was prepared in 93% yield (1.98 g) as pale yellow oil starting from 10 mmol of **7c**.  $^1\text{H NMR}$  (400 MHz,  $\text{CDCl}_3$ )  $\delta$  8.06-7.95 (m, 2H), 7.68-7.61 (m, 1H), 7.56-7.44 (m, 2H), 5.64 (s, 1H), 3.83 (s, 3H).  $^{13}\text{C NMR}$  (100 MHz,  $\text{CDCl}_3$ )  $\delta$  188.3, 165.9, 134.6, 133.3, 129.4, 129.1, 57.8, 54.0. **HRMS** (ESI,  $m/z$ ) calcd for  $\text{C}_{10}\text{H}_{10}\text{ClO}_3$  [ $\text{M} + \text{H}$ ] $^+$  213.0313, found 213.0317.

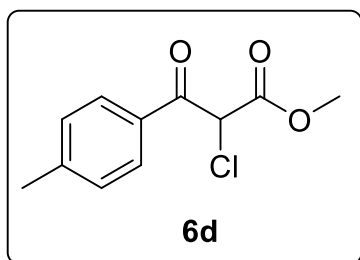

**Methyl 2-chloro-3-oxo-3-(p-tolyl)propanoate (6d)** was prepared in 93% yield (47.0 g) as white solid starting from 223 mmol of **7d**.  $m.p$  = 46.8-48.3  $^\circ\text{C}$ .  $^1\text{H NMR}$  (400 MHz,  $\text{CDCl}_3$ )  $\delta$  7.86 (d,  $J$  = 8.0 Hz, 2H), 7.25 (d,  $J$  = 8.0 Hz, 2H), 5.67 (s, 1H), 3.76 (s, 3H), 2.37 (s, 3H).  $^{13}\text{C NMR}$  (100 MHz,  $\text{CDCl}_3$ )  $\delta$  187.8, 165.8, 145.6, 130.6, 129.6, 129.3, 57.5, 53.6, 21.6. **HRMS** (ESI,  $m/z$ ) calcd for  $\text{C}_{11}\text{H}_{12}\text{ClO}_3$  [ $\text{M} + \text{H}$ ] $^+$  227.0469, found 227.0471.

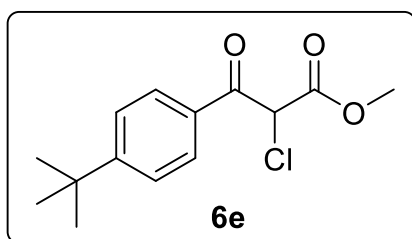

**Methyl 3-(4-(tert-butyl)phenyl)-2-chloro-3-oxopropanoate (6e)** was prepared in 75% yield (2.01 g) as pale yellow oil starting from 10 mmol of **7e**.  $^1\text{H NMR}$  (400 MHz,  $\text{CDCl}_3$ )  $\delta$  7.97-7.92 (m, 2H), 7.55-7.49 (m, 2H), 5.63 (s, 1H), 3.83 (s, 3H), 1.35 (s, 9H).  $^{13}\text{C NMR}$  (100 MHz,  $\text{CDCl}_3$ )  $\delta$  187.7, 165.9, 158.6, 130.6, 129.3, 126.0, 57.7, 53.8, 35.4, 31.0. **HRMS** (ESI,  $m/z$ ) calcd for  $\text{C}_{14}\text{H}_{18}\text{ClO}_3$  [ $\text{M} + \text{H}$ ] $^+$  269.0939, found 269.0942.

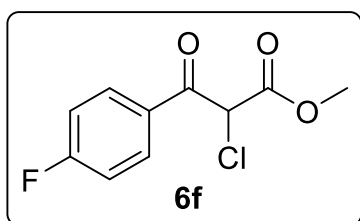

**Methyl 2-chloro-3-(4-fluorophenyl)-3-oxopropanoate (6f)** was prepared in 86% yield (1.97 g) as pale yellow oil starting from 10 mmol of **7f**.  $^1\text{H NMR}$  (400 MHz,  $\text{CDCl}_3$ )  $\delta$  8.08-8.01 (m, 2H), 7.22-7.15 (m, 2H), 5.58 (s, 1H), 3.84 (s, 3H).  $^{13}\text{C NMR}$  (100 MHz,  $\text{CDCl}_3$ )  $\delta$  186.8, 166.5 (d,  $J$  = 256.3 Hz), 165.7, 132.3 (d,  $J$  = 9.5 Hz), 129.7 (d,  $J$  = 3.0 Hz), 116.3 (d,  $J$  = 22.2 Hz), 57.8, 54.0. **HRMS** (ESI,  $m/z$ ) calcd for  $\text{C}_{10}\text{H}_8\text{ClFO}_3\text{Na}$  [ $\text{M} + \text{Na}$ ] $^+$  253.0038, found 253.0038.

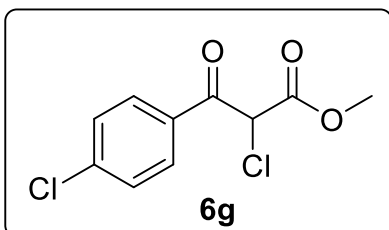

**Methyl 2-chloro-3-(4-chlorophenyl)-3-oxopropanoate (6g)** was prepared in 87% yield (2.12 g) as pale yellow oil starting from 10 mmol of **7g**.  $^1\text{H NMR}$  (400 MHz,  $\text{CDCl}_3$ )  $\delta$  8.08-8.00 (m, 2H), 7.23-7.14 (m, 2H), 5.58 (s, 1H), 3.84 (s, 3H).  $^{13}\text{C NMR}$  (100 MHz,  $\text{CDCl}_3$ )  $\delta$  187.2, 165.7, 141.3, 131.6, 130.8, 129.5, 57.8, 54.1. **HRMS** (ESI,  $m/z$ ) calcd for  $\text{C}_{10}\text{H}_8\text{Cl}_2\text{O}_3\text{Na}$  [ $\text{M} + \text{Na}$ ] $^+$  268.9743, found 268.9741.



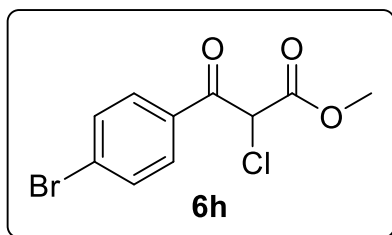

**Methyl 3-(4-bromophenyl)-2-chloro-3-oxopropanoate (6h)** was prepared in 90% yield (2.61 g) as pale yellow oil starting from 10 mmol of **7h**.  $^1\text{H NMR}$  (400 MHz,  $\text{CDCl}_3$ )  $\delta$  7.88-7.84 (m, 2H), 7.67-7.63 (m, 2H), 5.57 (s, 1H), 3.83 (s, 3H).  $^{13}\text{C NMR}$  (100 MHz,  $\text{CDCl}_3$ )  $\delta$  187.4, 165.7, 132.5, 132.0, 130.9, 130.1, 57.8, 54.1. **HRMS** (ESI,  $m/z$ ) calcd for  $\text{C}_{10}\text{H}_9\text{BrClO}_3$  [ $\text{M} + \text{H}$ ] $^+$  290.9418, found 290.9414.

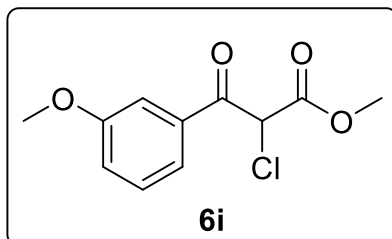

**Methyl 2-chloro-3-(3-methoxyphenyl)-3-oxopropanoate (6i)** was prepared in 83% yield (2.01 g) as pale yellow oil starting from 10 mmol of **7i**.  $^1\text{H NMR}$  (400 MHz,  $\text{CDCl}_3$ )  $\delta$  7.56 (ddd,  $J = 7.7, 1.7, 0.9$  Hz, 1H), 7.52 (dd,  $J = 2.7, 1.6$  Hz, 1H), 7.41 (t,  $J = 8.0$  Hz, 1H), 7.18 (ddd,  $J = 8.3, 2.7, 0.9$  Hz, 1H), 5.63 (s, 1H), 3.86 (s, 3H), 3.83 (s, 3H).  $^{13}\text{C NMR}$  (100 MHz,  $\text{CDCl}_3$ )  $\delta$  188.1, 165.9, 160.1, 134.6, 130.0, 121.8, 121.2, 113.5, 57.8, 55.6, 53.9. **HRMS** (ESI,  $m/z$ ) calcd for  $\text{C}_{11}\text{H}_{12}\text{ClO}_4$  [ $\text{M} + \text{H}$ ] $^+$  243.0419, found 243.0416.

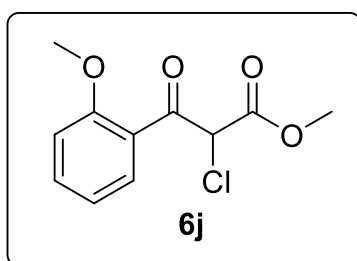

**Methyl 2-chloro-3-(2-methoxyphenyl)-3-oxopropanoate (6j)** was prepared in 86% yield (2.08 g) as pale yellow oil starting from 10 mmol of **7j**.  $^1\text{H NMR}$  (400 MHz,  $\text{CDCl}_3$ )  $\delta$  7.87 (dd,  $J = 7.8, 1.8$  Hz, 1H), 7.53 (ddd,  $J = 8.4, 7.3, 1.8$  Hz, 1H), 7.03 (ddd,  $J = 8.0, 7.3, 1.0$  Hz, 1H), 6.97 (dd,  $J = 8.5, 1.0$  Hz, 1H), 5.71 (s, 1H), 3.88 (s, 3H), 3.76 (s, 3H).  $^{13}\text{C NMR}$  (100 MHz,  $\text{CDCl}_3$ )  $\delta$  188.2, 166.3, 158.7, 135.6, 131.9, 123.9, 121.3, 111.8, 62.5, 55.5, 53.3. **HRMS** (ESI,  $m/z$ ) calcd for  $\text{C}_{11}\text{H}_{12}\text{ClO}_4$  [ $\text{M} + \text{H}$ ] $^+$  243.0419, found 243.0414.

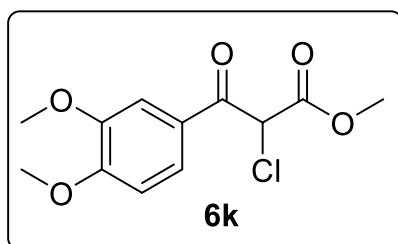

**Methyl 2-chloro-3-(3,4-dimethoxyphenyl)-3-oxopropanoate (6k)** was prepared in 29% yield (0.78 g) as pale yellow oil starting from 10 mmol of **7k**.  $^1\text{H NMR}$  (400 MHz,  $\text{CDCl}_3$ )  $\delta$  7.64 (dd,  $J = 8.4, 2.1$  Hz, 1H), 7.55 (d,  $J = 2.1$  Hz, 1H), 6.92 (d,  $J = 8.5$  Hz, 1H), 5.62 (s, 1H), 3.97 (s, 3H), 3.94 (s, 3H), 3.83 (s, 3H).  $^{13}\text{C NMR}$  (100 MHz,  $\text{CDCl}_3$ )  $\delta$  186.8, 166.2, 154.6, 149.5, 126.4, 124.5, 111.3, 110.3, 57.8, 56.4, 56.2, 54.0. **HRMS** (ESI,  $m/z$ ) calcd for  $\text{C}_{12}\text{H}_{13}\text{ClNaO}_5$  [ $\text{M} + \text{Na}$ ] $^+$  295.0344, found 295.0349.

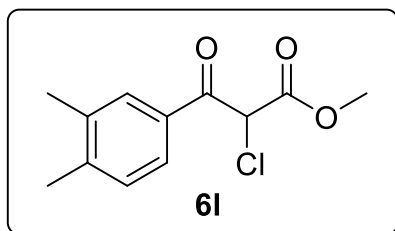

**Methyl 2-chloro-3-(3,4-dimethylphenyl)-3-oxopropanoate (6l)** was prepared in 36% yield (0.86 g) as pale yellow oil starting from 10 mmol of **7l**.  $^1\text{H NMR}$  (400 MHz,  $\text{CDCl}_3$ )  $\delta$  7.75 (d,  $J = 2.0$  Hz, 1H), 7.70 (dd,  $J = 7.9, 2.0$  Hz, 1H), 7.23 (d,  $J = 7.9$  Hz, 1H), 5.64 (s, 1H), 3.80 (s, 3H), 2.31 (s, 3H), 2.30 (s, 3H).  $^{13}\text{C NMR}$  (100 MHz,  $\text{CDCl}_3$ )  $\delta$  188.0, 166.0, 144.6, 137.6, 131.1, 130.3, 130.2, 127.1, 57.6, 53.8, 20.2, 19.8. **HRMS** (ESI,  $m/z$ ) calcd for  $\text{C}_{12}\text{H}_{13}\text{ClNaO}_3$  [ $\text{M} + \text{Na}$ ] $^+$  263.0445, found 263.0439.

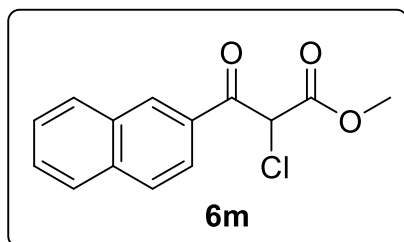

**Methyl 2-chloro-3-(naphthalen-2-yl)-3-oxopropanoate (6m)** was prepared in 77% yield (2.01 g) as off white solid starting from 10 mmol of **7m**.  $m.p = 79.2-80.1$  °C.  $^1\text{H NMR}$  (400 MHz,  $\text{CDCl}_3$ )  $\delta$  8.54 (d,  $J = 1.9$  Hz, 1H), 8.08-7.98 (m, 2H), 7.92 (dd,  $J = 14.8, 8.4$  Hz, 2H), 7.68-7.57 (m, 2H), 5.80 (s, 1H), 3.85 (s, 3H).  $^{13}\text{C NMR}$  (100 MHz,  $\text{CDCl}_3$ )  $\delta$  188.3, 166.0, 136.2, 132.5, 131.7, 130.7, 130.0, 129.6, 129.1, 128.0, 127.4, 124.4, 57.9, 54.0. **HRMS** (ESI,  $m/z$ ) calcd for  $\text{C}_{14}\text{H}_{12}\text{ClO}_3$  [ $\text{M} + \text{H}$ ] $^+$  263.0469, found 263.0468.

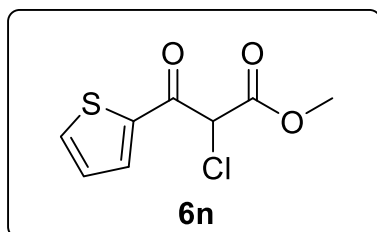

**Methyl 2-chloro-3-(thiophen-2-yl)-3-oxopropanoate (6n)** was prepared in 79% yield (1.72 g) as pale yellow oil starting from 10 mmol of **7n**.  $^1\text{H NMR}$  (400 MHz,  $\text{CDCl}_3$ )  $\delta$  7.87 (dd,  $J = 3.9, 1.1$  Hz, 1H), 7.77 (dd,  $J = 4.9, 1.1$  Hz, 1H), 7.17 (dd,  $J = 5.0, 3.9$  Hz, 1H), 5.49 (s, 1H), 3.82 (s, 3H).  $^{13}\text{C NMR}$  (100 MHz,  $\text{CDCl}_3$ )  $\delta$  181.1, 165.5, 140.0, 136.4, 134.6, 128.7, 58.6, 54.0. **HRMS** (ESI,  $m/z$ ) calcd for  $\text{C}_8\text{H}_8\text{ClO}_3\text{S}$  [ $\text{M} + \text{H}$ ] $^+$  218.9877, found 218.9880.

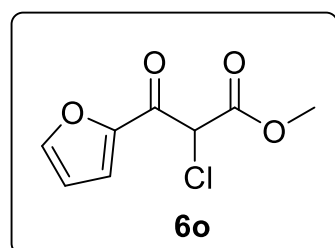

**Methyl 2-chloro-3-(furan-2-yl)-3-oxopropanoate (6o)** was prepared in 93% yield (1.87 g) as pale yellow oil starting from 10 mmol of **7o**.  $^1\text{H NMR}$  (400 MHz,  $\text{CDCl}_3$ )  $\delta$  7.67 (dd,  $J = 1.7, 0.7$  Hz, 1H), 7.42 (dd,  $J = 3.7, 0.8$  Hz, 1H), 6.62 (dd,  $J = 3.7, 1.7$  Hz, 1H), 5.50 (s, 1H), 3.83 (s, 3H).  $^{13}\text{C NMR}$  (100 MHz,  $\text{CDCl}_3$ )  $\delta$  176.8, 165.4, 149.7, 148.1, 120.6, 113.3, 57.6, 54.0. **HRMS** (ESI,  $m/z$ ) calcd for  $\text{C}_8\text{H}_8\text{ClO}_4$  [ $\text{M} + \text{H}$ ] $^+$  203.0106, found 203.0103.

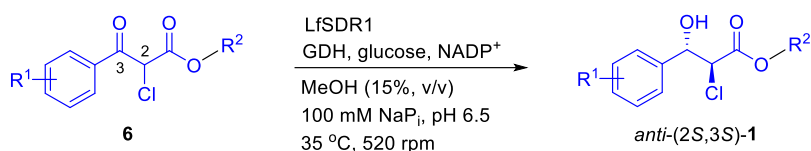

**Scheme S4. Preparative-scale (0.6 mmol) synthesis of *anti*-(2*S*,3*S*)-1 catalyzed by LfSDR1.**

To a solution of  $\alpha$ -chloro  $\beta$ -keto ester **6** (0.6 mmol) in MeOH (9 mL) were added glucose (0.9 mmol, 1.5 equiv.), NADP<sup>+</sup> (0.2 mM), 200  $\mu$ L 15% (w/v) CFE of GDH in NaP<sub>i</sub> buffer (100 mM, pH 6.5), 10 mL 15% (w/v) CFE of LfSDR1 in NaP<sub>i</sub> buffer (100 mM, pH 6.5), and 41 mL of NaP<sub>i</sub> buffer (100 mM, pH 6.5). After stirring at 35  $^\circ$ C (referred to the setting temperature of the heating apparatus, applied to all the biocatalytic reactions) with 520 rpm for 6 h, the reaction mixture was extracted with ethyl acetate and subjected to centrifugation for three times. The organic layers were combined, dried with Na<sub>2</sub>SO<sub>4</sub>, and filtered. An aliquot of the filtrate was taken for <sup>1</sup>H NMR analysis to determine the diastereoselectivity. The filtrate was concentrated *in vacuo* and the residue was purified by preparative thin layer chromatography on silica gel (petroleum ether/ethyl acetate) to afford *anti*-(2*S*,3*S*)-1.

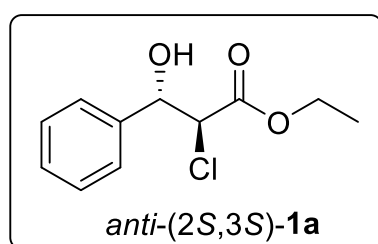

**Ethyl** (2*S*,3*S*)-2-chloro-3-hydroxy-3-phenylpropanoate (*anti*-(2*S*,3*S*)-1a) was prepared in 95% yield (130.3 mg) as pale yellow oil. <sup>1</sup>H NMR (400 MHz, CDCl<sub>3</sub>)  $\delta$  7.45-7.32 (m, 5H), 5.02 (dd, *J* = 7.9, 5.1 Hz, 1H), 4.37 (d, *J* = 7.9 Hz, 1H), 4.23 (dq, *J* = 7.1, 1.0 Hz, 2H), 3.38 (d, *J* = 5.2 Hz, 1H), 1.26 (t, *J* = 7.2 Hz, 3H). <sup>13</sup>C NMR (100 MHz, CDCl<sub>3</sub>)  $\delta$  169.0, 138.9, 128.8, 128.5, 127.0, 75.3, 62.4, 59.3, 13.9. **HRMS** (ESI, *m/z*) calcd for C<sub>11</sub>H<sub>13</sub>ClO<sub>3</sub>Na [M + Na]<sup>+</sup> 251.0445, found 251.0447. [ $\alpha$ ]<sub>D</sub><sup>20</sup> = +28.40 (*c* = 1.0, MeOH). **HPLC** Chiracel® OJ-H, 250  $\times$  4.6 mm column, hexane/2-propanol 90:10, 1.0 mL/min flow rate, 220 nm UV lamp, 25  $^\circ$ C, *t*<sub>1</sub> = 15.106 min, *t*<sub>2</sub> = 16.956 min (major), *t*<sub>3</sub> = 24.619 min, *t*<sub>4</sub> = 27.492 min. ee = >99%, dr = >99:1 (dr = >99:1, after purification).

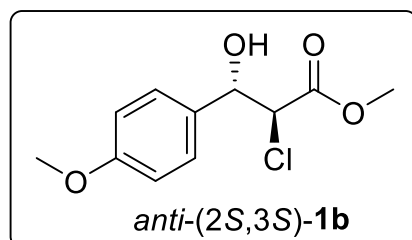

**Methyl** (2*S*,3*S*)-2-chloro-3-hydroxy-3-(4-methoxyphenyl)propanoate (*anti*-(2*S*,3*S*)-1b) was prepared in 96% yield (140.2 mg) as white solid. **m.p.** = 82-83  $^\circ$ C. <sup>1</sup>H NMR (400 MHz, CDCl<sub>3</sub>)  $\delta$  7.34-7.30 (m, 2H), 6.93-6.89 (m, 2H), 4.99 (dd, *J* = 8.1, 3.9 Hz, 1H), 4.36 (d, *J* = 8.2 Hz, 1H), 3.811 (s, 3H), 3.808 (s, 3H), 2.97 (d, *J* = 4.8 Hz, 1H). <sup>13</sup>C NMR (100 MHz, CDCl<sub>3</sub>)  $\delta$  169.5, 159.9, 130.8, 128.2, 114.0, 75.0, 59.1, 55.3, 53.2. **HRMS** (ESI, *m/z*) calcd for C<sub>11</sub>H<sub>13</sub>ClO<sub>4</sub>Na [M + Na]<sup>+</sup> 267.0395, found 267.0392. [ $\alpha$ ]<sub>D</sub><sup>20</sup> = +32 (*c* = 0.94, CHCl<sub>3</sub>). (lit.<sup>[31]</sup>: [ $\alpha$ ]<sub>D</sub><sup>20</sup> = +36 (*c* = 0.94, CHCl<sub>3</sub>)). **HPLC** Chiracel® OJ-H, 250  $\times$  4.6 mm column, hexane/2-propanol 70:30, 1.0 mL/min flow rate, 220 nm UV

lamp, 25 °C,  $t_1 = 11.528$  min,  $t_2 = 12.825$  min (major),  $t_3 = 16.463$  min,  $t_4 = 19.876$  min. ee = 99%, dr = 43:1, (dr = 99:1, after purification).

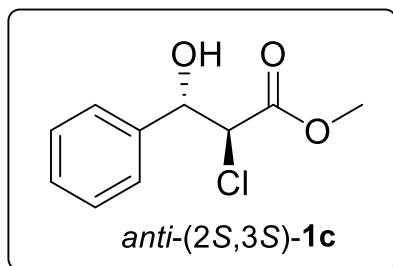

**Methyl (2*S*,3*S*)-2-chloro-3-hydroxy-3-phenylpropanoate (*anti*-(2*S*,3*S*)-1c)** was prepared in 86% yield (110.0 mg) as pale yellow oil. <sup>1</sup>H NMR (400 MHz, CDCl<sub>3</sub>) δ 7.42-7.32 (m, 5H), 5.02 (dd,  $J = 8.0$  Hz, 4.7 Hz, 1H), 4.38 (d,  $J = 8.0$  Hz, 1H), 3.78 (s, 3H), 3.32 (d,  $J = 4.9$  Hz, 1H). <sup>13</sup>C NMR (100 MHz, CDCl<sub>3</sub>) δ 169.5, 138.8, 128.9, 128.6, 127.0, 75.4, 59.1,

53.2. **HRMS** (ESI,  $m/z$ ) calcd for C<sub>10</sub>H<sub>11</sub>ClO<sub>3</sub>Na [M + Na]<sup>+</sup> 237.0289, found 237.0286.  $[\alpha]_D^{20} = +8.67$  ( $c = 0.7$ , MeOH). **HPLC** Chiracel® OJ-H, 250 × 4.6 mm column, hexane/2-propanol 70:30, 0.6 mL/min flow rate, 220 nm UV lamp, 25 °C,  $t_1 = 14.275$  min,  $t_2 = 18.251$  min (major),  $t_3 = 21.604$  min,  $t_4 = 24.258$  min. ee = >99%, dr = 43:1 (dr = 42:1, after purification).

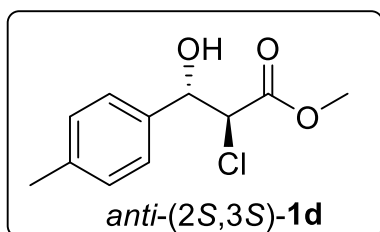

**Methyl (2*S*,3*S*)-2-chloro-3-hydroxy-3-(p-tolyl)propanoate (*anti*-(2*S*,3*S*)-1d)** was prepared in 96% yield (131.1 mg) as pale yellow oil. <sup>1</sup>H NMR (400 MHz, CDCl<sub>3</sub>) δ 7.30-7.25 (m, 2H), 7.19 (d,  $J = 7.9$  Hz, 2H), 5.00 (dd,  $J = 8.0$ , 4.9 Hz, 1H), 4.38 (d,  $J = 8.0$  Hz, 1H), 3.80 (s, 3H), 2.99 (d,  $J = 5.0$  Hz, 1H), 2.36 (s, 3H). <sup>13</sup>C

NMR (100 MHz, CDCl<sub>3</sub>) δ 169.5, 138.8, 135.9, 129.4, 126.9, 75.3, 59.1, 53.2, 21.3. **HRMS** (ESI,  $m/z$ ) calcd for C<sub>11</sub>H<sub>13</sub>ClO<sub>3</sub>Na [M + Na]<sup>+</sup> 251.0445, found 251.0442.  $[\alpha]_D^{20} = +20.16$  ( $c = 1.0$ , MeOH). **HPLC** Chiracel® OJ-H, 250 × 4.6 mm column, hexane/2-propanol 90:10, 1.0 mL/min flow rate, 220 nm UV lamp, 25 °C,  $t_1 = 15.777$  min,  $t_2 = 19.254$  min (major),  $t_3 = 24.427$  min,  $t_4 = 32.646$  min. ee = 92%, dr = 17:1 (dr = 16:1, after purification).

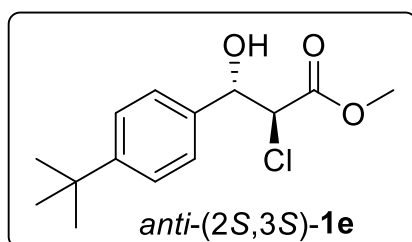

**Methyl (2*S*,3*S*)-3-(4-(*tert*-butyl)phenyl)-2-chloro-3-hydroxypropanoate (*anti*-(2*S*,3*S*)-1e)** was prepared in 93% yield (150.1 mg) as pale yellow oil. <sup>1</sup>H NMR (400 MHz, CDCl<sub>3</sub>) δ 7.43-7.38 (m, 2H), 7.35-7.30 (m, 2H), 5.02 (dd,  $J = 8.1$ , 4.5 Hz, 1H), 4.40 (d,  $J = 8.1$  Hz, 1H), 3.82 (s, 3H), 2.88 (d,  $J = 4.9$  Hz, 1H), 1.32 (s, 9H). <sup>13</sup>C NMR (100 MHz,

CDCl<sub>3</sub>) δ 169.6, 152.0, 135.8, 126.8, 125.7, 75.3, 59.0, 53.3, 34.8, 31.4. **HRMS** (ESI,  $m/z$ ) calcd for C<sub>14</sub>H<sub>19</sub>ClO<sub>3</sub>Na [M + Na]<sup>+</sup> 293.0915, found 293.0918.  $[\alpha]_D^{20} = +13.40$  ( $c = 0.2$ , MeOH). **HPLC** Chiracel® IF, 250 × 4.6 mm column, hexane/2-propanol 90:10, 0.8 mL/min flow rate, 220 nm UV lamp, 25 °C,  $t_1 = 8.921$  min,  $t_2 = 10.760$  min,  $t_3 = 12.024$  min (major),  $t_4 = 13.162$  min. ee = >99%, dr = 37:1 (dr = 35:1, after purification).

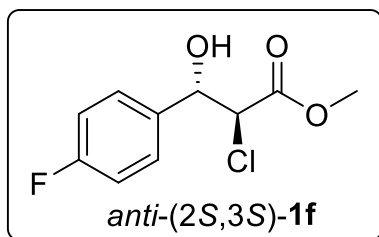

**Methyl (2*S*,3*S*)-2-chloro-3-(4-fluorophenyl)-3-hydroxypropanoate (*anti*-(2*S*,3*S*)-1*f*)** was prepared in 79% yield (110.1 mg) as pale yellow oil. <sup>1</sup>H NMR (400 MHz, CDCl<sub>3</sub>) δ 7.37-7.30 (m, 2H), 7.08-7.00 (m, 2H), 4.99 (dd, *J* = 8.2, 4.9 Hz, 1H), 4.33 (d, *J* = 8.2 Hz, 1H), 3.83 (dd, *J* = 5.1, 2.4 Hz, 1H), 3.75 (s, 3H). <sup>13</sup>C NMR (100 MHz, CDCl<sub>3</sub>) δ 169.3, 162.7 (d, *J* = 245.6

Hz), 134.6 (d, *J* = 3.0 Hz), 128.7 (d, *J* = 8.3 Hz), 115.3 (d, *J* = 21.4 Hz), 74.4, 59.1, 53.1. **HRMS** (ESI, *m/z*) calcd for C<sub>10</sub>H<sub>10</sub>ClFO<sub>3</sub>Na [M + Na]<sup>+</sup> 255.0195, found 255.0195. [α]<sub>D</sub><sup>20</sup> = +23.54 (c = 1.0, MeOH). **HPLC** Chiracel® IF, 250 × 4.6 mm column, hexane/2-propanol 85:15, 0.8 mL/min flow rate, 220 nm UV lamp, 35 °C, *t*<sub>1</sub> = 13.765 min, *t*<sub>2</sub> = 14.514 min (major), *t*<sub>3</sub> = 17.810 min, *t*<sub>4</sub> = 22.580 min. ee = 96%, dr = 9.2:1 (dr = 9:1, after purification).

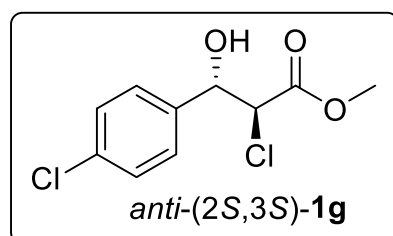

**Methyl (2*S*,3*S*)-2-chloro-3-(4-chlorophenyl)-3-hydroxypropanoate (*anti*-(2*S*,3*S*)-1*g*)** was prepared in 87% yield (130.0 mg) as pale yellow oil. *Anti/syn* = 5:1; <sup>1</sup>H NMR (400 MHz, CDCl<sub>3</sub>) δ 7.38-7.28 (m, 4H), 5.13 (d, *J* = 6.0 Hz, 1H, *syn*), 5.01 (d, *J* = 7.9 Hz, 1H, *anti*), 4.41 (d, *J* = 6.0 Hz, 1H, *syn*), 4.32 (d, *J* = 7.9 Hz, 1H, *anti*), 3.79 (s, 3H, *anti*), 3.69 (s, 3H, *syn*), 3.29 (s,

1H, *anti*), 3.20 (s, 1H, *syn*). <sup>13</sup>C NMR (100 MHz, CDCl<sub>3</sub>) δ 169.3 (*anti*), 168.4 (*syn*), 137.2 (*anti*), 136.7 (*syn*), 134.6 (*anti*), 134.6 (*syn*), 128.8 (*syn*), 128.7 (*anti*), 128.4 (*anti*), 128.0 (*syn*), 74.6 (*anti*), 73.7 (*syn*), 62.4 (*syn*), 58.9 (*anti*), 53.3 (*anti*), 53.2 (*syn*). **HRMS** (ESI, *m/z*) calcd for C<sub>10</sub>H<sub>10</sub>Cl<sub>2</sub>O<sub>3</sub>Na [M + Na]<sup>+</sup> 270.9899, found 270.9892; [α]<sub>D</sub><sup>20</sup> = +17.17 (c = 0.6, MeOH). **HPLC** Chiracel® OJ-H, 250 × 4.6 mm column, hexane/2-propanol 90:10, 1.0 mL/min flow rate, 220 nm UV lamp, 25 °C, *t*<sub>1</sub> = 15.358 min, *t*<sub>2</sub> = 17.291 min (major), *t*<sub>3</sub> = 24.481 min, *t*<sub>4</sub> = 26.659 min. ee = 77%, dr = 7.2:1 (dr = 6.7:1, after purification).

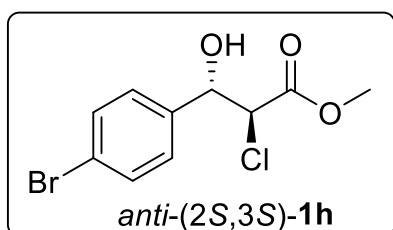

**Methyl (2*S*,3*S*)-3-(4-bromophenyl)-2-chloro-3-hydroxypropanoate (*anti*-(2*S*,3*S*)-1*h*)** was prepared in 95% yield (167.1 mg) as pale yellow oil. *Anti/syn* = 5:1; <sup>1</sup>H NMR (400 MHz, CDCl<sub>3</sub>) δ 7.55-7.46 (m, 2H), 7.31-7.20 (m, 2H), 5.13 (dd, *J* = 5.9, 3.9 Hz, 1H, *syn*), 5.01 (dd, *J* = 7.8, 4.7 Hz, 1H, *anti*), 4.41 (dd, *J* = 5.9,

1.4 Hz, 1H, *syn*), 4.33 (dd, *J* = 7.9, 1.3 Hz, 1H, *anti*), 3.80 (s, 3H, *anti*), 3.71 (s, 3H, *syn*), 3.10 (d, *J* = 4.8 Hz, 1H, *anti*), 3.06 (d, *J* = 4.0 Hz, 1H, *syn*). <sup>13</sup>C NMR (100 MHz, CDCl<sub>3</sub>) δ 169.3 (*anti*), 168.5 (*syn*), 137.8 (*anti*), 137.3 (*syn*), 131.9 (*syn*), 131.8 (*anti*), 128.8 (*anti*), 128.4 (*syn*), 123.0, 74.8 (*anti*), 73.9 (*syn*), 62.4 (*syn*), 58.9 (*anti*), 53.4. **HRMS** (ESI, *m/z*) calcd for C<sub>10</sub>H<sub>10</sub>BrClO<sub>3</sub>Na [M + Na]<sup>+</sup> 314.9394, found 314.9391; [α]<sub>D</sub><sup>20</sup> = +19.90 (c = 0.4, MeOH). **HPLC** Chiracel® OJ-H, 250 × 4.6 mm column, hexane/2-propanol 90:10, 1.0 mL/min flow rate, 220 nm UV lamp, 25 °C, *t*<sub>1</sub> = 15.989 min, *t*<sub>2</sub> =

18.266 min (major),  $t_3 = 24.612$  min,  $t_4 = 26.567$  min. ee = 75%, dr = 5.3:1 (dr = 6.1:1, after purification).

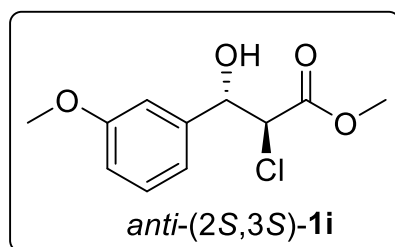

**Methyl (2*S*,3*S*)-2-chloro-3-hydroxy-3-(3-methoxyphenyl)-1propanoate (*anti*-(2*S*,3*S*)-**1i**)** was prepared in 95% yield (138.7 mg) as pale yellow oil.  $^1\text{H NMR}$  (400 MHz,  $\text{CDCl}_3$ )  $\delta$  7.29 (t,  $J = 7.9$  Hz, 1H), 7.00-6.93 (m, 2H), 6.88 (dd,  $J = 8.2, 2.7$  Hz, 1H), 5.00 (dd,  $J = 7.9, 4.9$  Hz, 1H), 4.38 (d,  $J = 7.9$  Hz, 1H), 3.81 (s, 3H), 3.80 (s, 3H), 3.12 (d,  $J = 5.0$  Hz, 1H).

$^{13}\text{C NMR}$  (100 MHz,  $\text{CDCl}_3$ )  $\delta$  169.5, 159.8, 140.4, 129.7, 119.3, 114.4, 112.6, 75.4, 59.0, 55.4, 53.3. **HRMS** (ESI, m/z) calcd for  $\text{C}_{11}\text{H}_{13}\text{ClO}_4\text{Na}$   $[\text{M} + \text{Na}]^+$  267.0395, found 267.0395.  $[\alpha]_{\text{D}}^{20} = +16.94$  (c = 1.0, MeOH). **HPLC** Chiracel® OJ-H, 250  $\times$  4.6 mm column, hexane/2-propanol 70:30, 1.0 mL/min flow rate, 220 nm UV lamp, 25  $^\circ\text{C}$ ,  $t_1 = 9.608$  min,  $t_2 = 11.958$  min (major),  $t_3 = 13.447$  min,  $t_4 = 15.076$  min. ee = >99%, dr = >99:1 (dr = >99:1, after purification).

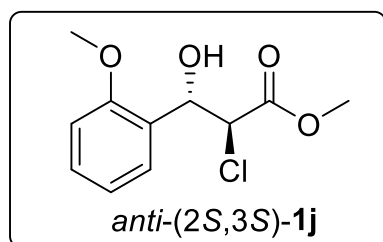

**Methyl (2*S*,3*S*)-2-chloro-3-hydroxy-3-(2-methoxyphenyl) propanoate (*anti*-(2*S*,3*S*)-**1j**)** was prepared in 93% yield (136.0 mg) as pale yellow oil.  $^1\text{H NMR}$  (400 MHz,  $\text{CDCl}_3$ )  $\delta$  7.32 (t,  $J = 7.5$  Hz, 2H), 6.98 (dt,  $J = 7.5, 1.1$  Hz, 1H), 6.95-6.90 (m, 1H), 5.10 (t,  $J = 7.9$  Hz, 1H), 4.67 (d,  $J = 7.8$  Hz, 1H), 3.89 (s, 3H), 3.77 (s, 3H).  $^{13}\text{C NMR}$  (100 MHz,  $\text{CDCl}_3$ )  $\delta$  169.4,

156.8, 129.9, 129.5, 126.1, 121.0, 110.8, 74.2, 57.5, 55.5, 53.0. **HRMS** (ESI, m/z) calcd for  $\text{C}_{11}\text{H}_{13}\text{ClO}_4\text{Na}$   $[\text{M} + \text{Na}]^+$  267.0395, found 267.0396.  $[\alpha]_{\text{D}}^{20} = +19.23$  (c = 1.2, MeOH). **HPLC** Chiracel® OJ-H, 250  $\times$  4.6 mm column, hexane/2-propanol 90:10, 0.6 mL/min flow rate, 220 nm UV lamp, 25  $^\circ\text{C}$ ,  $t_1 = 34.598$  min (major),  $t_2 = 37.889$  min,  $t_3 = 39.877$  min,  $t_4 = 55.606$  min. ee = >99%, dr = >99:1 (dr = >99:1, after purification).

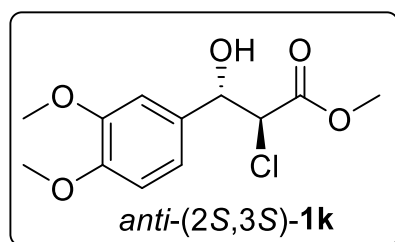

**Methyl (2*S*,3*S*)-2-chloro-3-(3,4-dimethoxyphenyl)-3-hydroxypropanoate (*anti*-(2*S*,3*S*)-**1k**)** was prepared in 89% yield (147.3 mg) as pale yellow oil.  $^1\text{H NMR}$  (400 MHz,  $\text{CDCl}_3$ )  $\delta$  6.94-6.84 (m, 3H), 4.98 (d,  $J = 8.0$  Hz, 1H), 4.36 (d,  $J = 8.0$  Hz, 1H), 3.88 (s, 3H), 3.87 (s, 3H), 3.81 (s, 3H).  $^{13}\text{C NMR}$  (100 MHz,  $\text{CDCl}_3$ )  $\delta$  169.6, 149.5, 149.2, 131.3, 119.7,

110.9, 109.7, 75.3, 59.2, 56.03, 56.01, 53.3. **HRMS** (ESI, m/z) calcd for  $\text{C}_{12}\text{H}_{15}\text{ClNaO}_5$   $[\text{M} + \text{Na}]^+$  297.0500, found 297.0491.  $[\alpha]_{\text{D}}^{20} = +19.85$  (c = 0.4, MeOH). **HPLC** Chiracel® OJ-H, 250  $\times$  4.6 mm column, hexane/2-propanol 85:15, 1.0 mL/min flow rate, 220 nm UV lamp, 25  $^\circ\text{C}$ ,  $t_1 = 27.216$  min (major),  $t_2 = 32.609$  min,  $t_3 = 50.917$  min,  $t_4 = 55.043$  min. ee = >99%, dr = 24:1 (dr = >99:1, after purification).

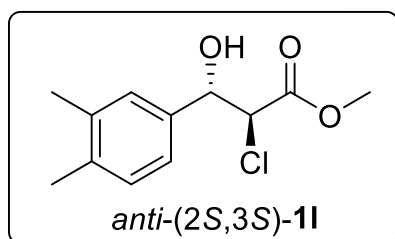

**Methyl (2*S*,3*S*)-2-chloro-3-(3,4-dimethylphenyl)-3-hydroxy propanoate (*anti*-(2*S*,3*S*)-1l)** was prepared in 74% yield (107.6 mg) as pale yellow oil. <sup>1</sup>H NMR (400 MHz, CDCl<sub>3</sub>) δ 7.19-7.08 (m, 3H), 4.97 (dd, *J* = 8.1, 4.5 Hz, 1H), 4.39 (d, *J* = 8.1 Hz, 1H), 3.82 (s, 1H), 2.91 (d, *J* = 4.9 Hz, 1H), 2.28 (s, 3H), 2.27 (s, 3H). <sup>13</sup>C NMR (100 MHz, CDCl<sub>3</sub>) δ 169.5, 137.4, 137.0, 136.1, 129.8, 128.0, 124.4, 75.3, 58.9, 53.1, 19.9, 19.6. **HRMS** (ESI, *m/z*) calcd for C<sub>12</sub>H<sub>15</sub>ClNaO<sub>3</sub> [*M* + Na]<sup>+</sup> 265.0602, found 265.0594. [α]<sub>D</sub><sup>20</sup> = +38.8 (*c* = 0.15, MeOH). **HPLC** Chiracel® IF, 250 × 4.6 mm column, hexane/2-propanol 90:10, 1.0 mL/min flow rate, 220 nm UV lamp, 25 °C, *t*<sub>1</sub> = 8.155 min, *t*<sub>2</sub> = 8.620 min (major), *t*<sub>3</sub> = 9.213 min, *t*<sub>4</sub> = 10.091 min. ee = 98%, dr = 17:1 (dr = 15:1, after purification).

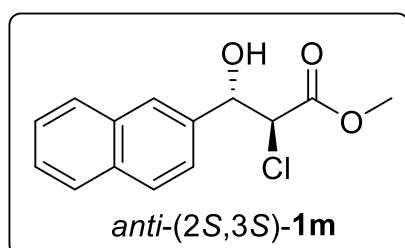

**Methyl (2*S*,3*S*)-2-chloro-3-(naphthalen-2-yl) propanoate (*anti*-(2*S*,3*S*)-1m)** was prepared in 95% yield (150.2 mg) as pale yellow solid. **m.p.** = 82-83 °C. <sup>1</sup>H NMR (400 MHz, CDCl<sub>3</sub>) δ 7.88-7.82 (m, 4H), 7.58-7.42 (m, 3H), 5.20 (dd, *J* = 7.9, 4.8 Hz, 1H), 4.51 (d, *J* = 7.9 Hz, 1H), 3.79 (s, 3H), 3.33 (d, *J* = 4.9 Hz, 1H). <sup>13</sup>C NMR (100 MHz, CDCl<sub>3</sub>) δ 169.5, 136.1, 133.5, 133.1, 128.6, 128.3, 127.8, 126.8, 126.6, 126.5, 124.1, 75.6, 59.0, 53.3. **HRMS** (ESI, *m/z*) calcd for C<sub>14</sub>H<sub>13</sub>ClO<sub>3</sub>Na [*M* + Na]<sup>+</sup> 287.0445, found 287.0444. [α]<sub>D</sub><sup>20</sup> = +30.46 (*c* = 1.0, MeOH). **HPLC** Chiracel® OJ-H, 250 × 4.6 mm column, hexane/2-propanol 70:30, 1.0 mL/min flow rate, 220 nm UV lamp, 25 °C, *t*<sub>1</sub> = 15.039 min (major), *t*<sub>2</sub> = 18.509 min, *t*<sub>3</sub> = 22.030 min, *t*<sub>4</sub> = 27.397 min. ee = >99%, dr = 85:1 (dr = >99:1, after purification).

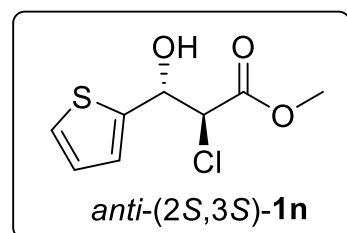

**Methyl (2*S*,3*S*)-2-chloro-3-(thiophen-2-yl) propanoate (*anti*-(2*S*,3*S*)-1n)** was prepared in 97% yield (128.1 mg) as pale yellow oil. <sup>1</sup>H NMR (400 MHz, CDCl<sub>3</sub>) δ 7.33 (dd, *J* = 5.0, 1.2 Hz, 1H), 7.11 (dt, *J* = 3.6, 0.9 Hz, 1H), 7.01 (dd, *J* = 5.1, 3.5 Hz, 1H), 5.33 (dd, *J* = 7.6, 5.6 Hz, 1H), 4.45 (d, *J* = 7.6 Hz, 1H), 3.82 (s, 3H), 3.22 (d, *J* = 5.7 Hz, 1H). <sup>13</sup>C NMR (100 MHz, CDCl<sub>3</sub>) δ 169.1, 142.1, 127.0, 126.4, 126.1, 71.7, 59.4, 53.4. **HRMS** (ESI, *m/z*) calcd for C<sub>8</sub>H<sub>9</sub>ClO<sub>3</sub>SNa [*M* + Na]<sup>+</sup> 242.9853, found 242.9853. [α]<sub>D</sub><sup>20</sup> = +8.98 (*c* = 1.0, MeOH). **HPLC** Chiracel® OJ-H, 250 × 4.6 mm column, hexane/2-propanol 90:10, 1.0 mL/min flow rate, 220 nm UV lamp, 25 °C, *t*<sub>1</sub> = 19.735 min, *t*<sub>2</sub> = 24.631 min (major), *t*<sub>3</sub> = 34.485 min, *t*<sub>4</sub> = 45.821 min. ee = >99%, dr = >99:1 (dr = >99:1, after purification).

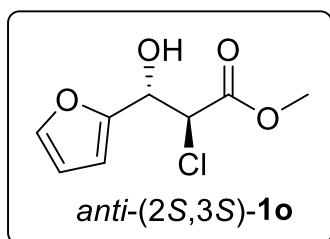

**Methyl (2*S*,3*S*)-2-chloro-3-(furan-2-yl)-3-hydroxypropanoate (*anti*-(2*S*,3*S*)-1o)** was prepared in 98% yield (120.1 mg) as pale yellow oil. **<sup>1</sup>H NMR** (400 MHz, CDCl<sub>3</sub>) δ 7.40 (dt, *J* = 1.9, 1.0 Hz, 1H), 6.45-6.32 (m, 2H), 5.06 (d, *J* = 8.0 Hz, 1H), 4.59 (d, *J* = 8.0, 1H), 3.80 (s, 3H), 3.44 (s, 1H). **<sup>13</sup>C NMR** (100 MHz, CDCl<sub>3</sub>) δ 169.0, 151.2, 142.9, 110.5, 109.2, 69.1, 56.7, 53.3. **HRMS**

(ESI, *m/z*) calcd for C<sub>8</sub>H<sub>9</sub>ClO<sub>4</sub>Na [M + Na]<sup>+</sup> 227.0082, found 227.0080; [α]<sub>D</sub><sup>20</sup> = +22.80 (*c* = 0.6, MeOH). **HPLC** Chiracel® IF, 250 × 4.6 mm column, hexane/2-propanol 90:10, 1.0 mL/min flow rate, 220 nm UV lamp, 25 °C, *t*<sub>1</sub> = 10.034 min, *t*<sub>2</sub> = 11.553 min (major), *t*<sub>3</sub> = 15.735 min, *t*<sub>4</sub> = 24.604 min. ee = >99%, dr = >99:1 (dr = >99:1, after purification).



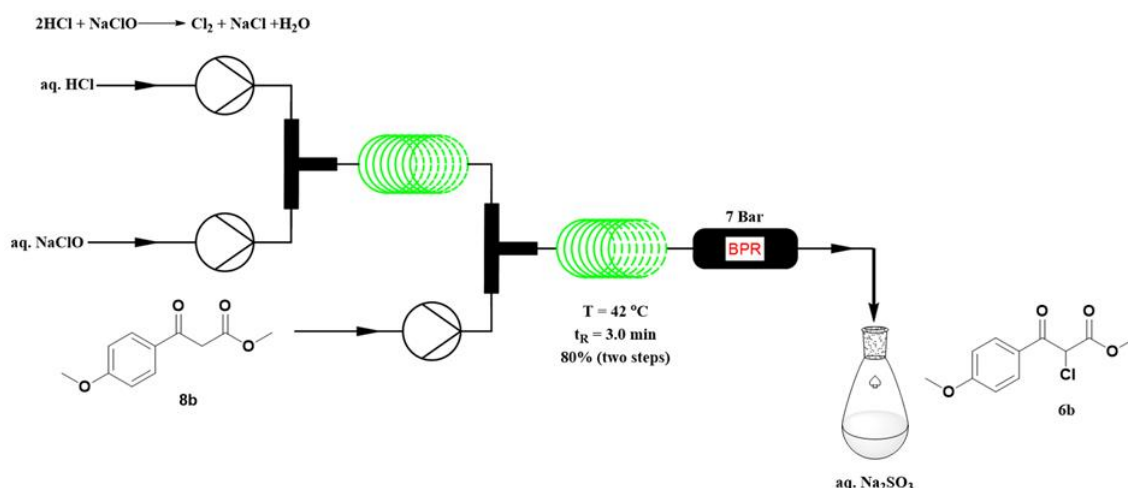

**Scheme S5. Synthesis of  $\alpha$ -chloro  $\beta$ -keto ester **6b** by chlorination of keto ester **8b** in flow using chlorine gas generated *in situ*.<sup>[4]</sup>**

This is a modified literature procedure.<sup>[4]</sup> HCl (6 M, 50 mL, 300 mmol) and NaClO (1.5 M, 50 mL, 75 mmol) were placed in 50 mL gas tight syringes and introduced by the syringe pumps to the first micromixer with 24 mL/h and 30 mL/h flow rates, respectively. The mixture was then passed through the 5 mL PTFE reactor coil ( $\frac{1}{16}$ , i.d. = 0.8 mm), which was connected to the second micromixer. A solution of the crude product of  $\beta$ -keto ester **8b** (6.0 g, 28.8 mmol), synthesized in the previous step and used without further purification, in dichloroethane (30 mL) was placed in a 50 mL gas-tight syringe and introduced to the second micromixer with 45 mL/h flow rate. The resulting mixture was then passed through the second 5 mL PTFE reactor coil ( $\frac{1}{16}$ , i.d. = 0.8 mm) at 42 °C (water bath) and 7 bar back-pressure with 3-minute residence time. After pumping the above **8b** solution for 6.7 minute (corresponding to 1.0 g of **8b**), the mixture eluted from the outlet of the reaction device was collected in a flask containing cooled 30%  $\text{Na}_2\text{SO}_3$ . The organic layer was easily separated from the aqueous layer, and the aqueous layer was extracted with ethyl acetate for two times. The combined organic layer was concentrated *in vacuo* to give crude product, and the residue was purified by column chromatography on silica gel (petroleum ether/ethyl acetate = 5:1) to afford  $\alpha$ -chloro  $\beta$ -keto ester **6b** (0.93 g, 80% yield over two steps).

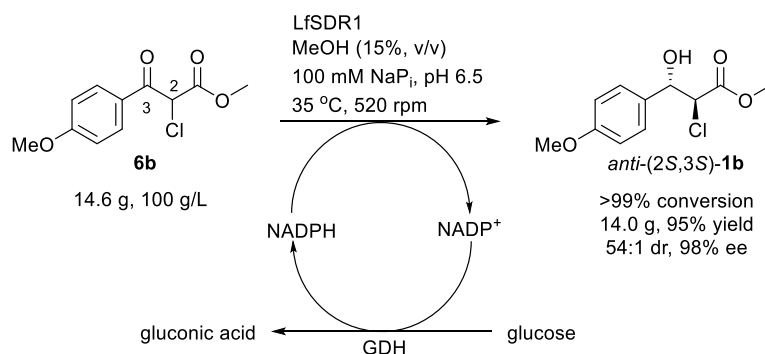

**Scheme S6. LfSDR1-catalyzed ten-gram scale synthesis of *anti*-(2S,3S)-1b at a 100 g/L of substrate concentration.**

To a stirred mixture of glucose (16.3 g, 1.5 equiv.), NADP<sup>+</sup> (21.7 mg, 0.2 mM), cell-free extracts of LfSDR1 (12 g/L), and cell-free extracts of GDH (0.6 g/L) in NaP<sub>i</sub> buffer (124.7 mL, 100 mM, pH 6.5) at 35 °C was continuously fed of a solution of **6b** (14.6 g, 100 g/L) in methanol (21.9 mL) at a rate of 0.15 mL/min through a syringe pump. This feeding process lasted for 4 h, followed by an additional 20 h of reaction time which was applied to guarantee a complete reduction of all the substrate added. The pH of the biotransformation during the entire process was maintained between 6.0 and 6.5 by titrating a NaOH solution. Complete conversion (>99%) was achieved as judged by the chiral HPLC analysis. Celite was then added and the resulting mixture was filtered. Ethyl acetate was employed to wash the filter cake for three times, and the two layers of filtrate were separated. The aqueous layer was extracted further with ethyl acetate for two times, and the combined organic layer was then washed with brine, dried, and concentrated *in vacuo* to furnish *anti*-(2S,3S)-**1b** (14.0 g, 95% yield) with a chemical purity of 94%, as well as an optical purity of 54:1 dr and 98% ee.

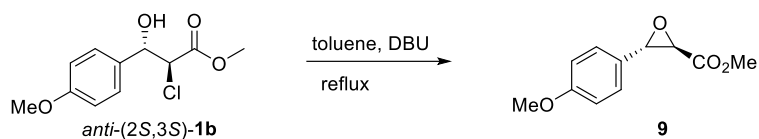

**Scheme S7. Synthesis of *trans* methyl (2*R*,3*S*)-3-(4-methoxyphenyl) glycidate **9**.<sup>[3]</sup>**

This is a modified literature procedure.<sup>[3]</sup> To a solution of chlorohydrin *anti*-(2*S*,3*S*)-**1b** (50 g, 205 mmol) in toluene (500 mL) was added DBU (46.8 g, 307.5 mmol, 1.5 equiv.). After stirring under reflux for 1 h, the mixture was diluted with water (1.5 L) and extracted with ethyl acetate for three times. The combined organic layers were washed with water, dried with anhydrous Na<sub>2</sub>SO<sub>4</sub>, and concentrated *in vacuo* to give compound **9** as pale yellow oil (40.31 g, 95% yield).

**Methyl (2*R*,3*S*)-3-(4-methoxyphenyl)oxirane-2-carboxylate**

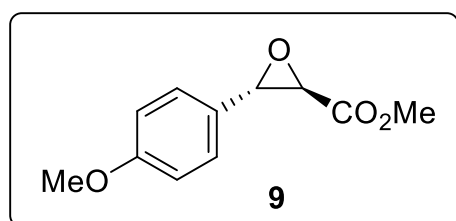

**<sup>1</sup>H NMR** (400 MHz, CDCl<sub>3</sub>) δ 7.22 (d, *J* = 8.7 Hz, 2H), 6.91 (d, *J* = 8.7 Hz, 2H), 4.07 (d, *J* = 1.6 Hz, 1H), 3.84 (s, 3H), 3.82 (s, 3H), 3.53 (d, *J* = 1.8 Hz, 1H). **<sup>13</sup>C NMR** (100 MHz, CDCl<sub>3</sub>) δ 168.9, 160.3, 127.2, 126.7, 114.1, 58.0, 56.6, 55.4, 52.6. **HRMS** (ESI, *m/z*) calcd for C<sub>11</sub>H<sub>13</sub>O<sub>4</sub> [M +

H]<sup>+</sup> 209.0808, found 209.0810. [α]<sub>D</sub><sup>20</sup> = -187 (c = 1.0, MeOH). (lit.<sup>[3]</sup>: [α]<sub>D</sub><sup>20</sup> = -196 (c = 1.0, MeOH)).

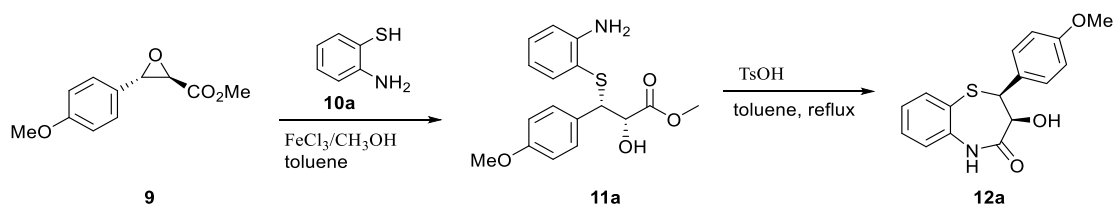

**Scheme S8. Synthesis of benzothiazepinones 12a.**<sup>[3,5,6]</sup>

This is a modified literature procedure.<sup>[3,5,6]</sup> A solution of *trans*-methyl glycidate **9** (10 g, 48 mmol) in toluene (200 mL) was heated at reflux. 2-Aminothiophenol **10a** (6.61 g, 52.8 mmol, 1.1 equiv.) and a solution of FeCl<sub>3</sub> 6H<sub>2</sub>O (1.28 mg, 4.8 × 10<sup>-3</sup> mmol, 10<sup>-4</sup> equiv.) in MeOH (480 μL) were added, and the resulting mixture was stirred at reflux for 4 h. Then, *p*-toluenesulfonic acid (165 mg, 0.96 mmol, 0.02 equiv.) was added and the reflux continued for an additional 7 h. After cooling down, the solvent was concentrated *in vacuo*, and the residue was purified by recrystallization (petroleum ether/ethyl acetate = 2:1) to give compound **12a** as off white solid (10.5 g, 73% yield).

**(2*S*,3*S*)-3-hydroxy-2-(4-methoxyphenyl)-2,3-dihydrobenzo[*b*][1,4]thiazepin-4(5*H*)-one**

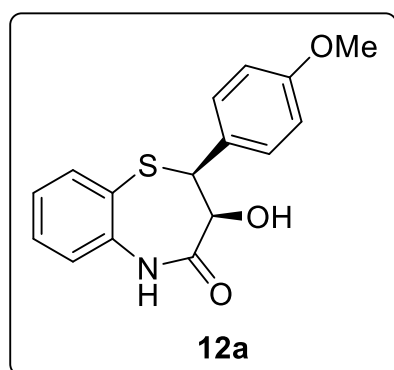

**m.p.** = 210-212 °C. **<sup>1</sup>H NMR** (400 MHz, DMSO-*d*<sub>6</sub>) δ 10.32 (s, 1H), 7.60 (d, *J* = 7.6 Hz, 1H), 7.47-7.33 (m, 3H), 7.21-7.07 (m, 2H), 6.88 (d, *J* = 8.8 Hz, 2H), 5.05 (d, *J* = 6.7 Hz, 1H), 4.75 (d, *J* = 6.2 Hz, 1H), 4.30 (t, *J* = 6.4 Hz, 1H), 3.75 (s, 3H). **<sup>13</sup>C NMR** (100 MHz, DMSO-*d*<sub>6</sub>) δ 172.5, 159.0, 142.0, 133.9, 130.9, 130.0, 128.5, 126.2, 125.6, 122.6, 113.3, 69.6, 57.1, 55.1. **HRMS** (ESI, *m/z*) calcd for C<sub>16</sub>H<sub>16</sub>NO<sub>3</sub>S [M + H]<sup>+</sup> 302.0845, found 302.0845. [α]<sub>D</sub><sup>20</sup> = +120 (c = 1.0, DMF). (lit.<sup>[3]</sup>: [α]<sub>D</sub><sup>20</sup> = +100 (c = 0.53, DMF)).

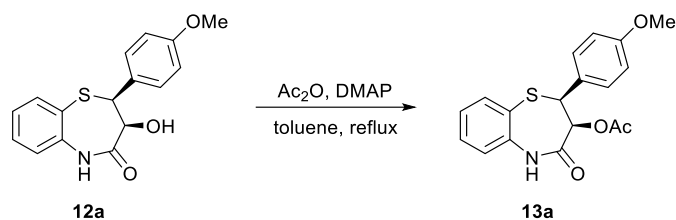

**Scheme S9. Synthesis of compound 13a.**

A mixture of benzothiazepinone **12a** (140 mg, 0.46 mmol), DMAP (5.7 mg, 0.046 mmol, 0.1 equiv.), and Ac<sub>2</sub>O (53  $\mu$ L, 0.56 mmol, 1.2 equiv.) in toluene (14 mL) was heated at reflux for 2 h. After cooling down, the toluene layer was separated and the aqueous layer was extracted with ethyl acetate. The combined organic layers were dried with anhydrous Na<sub>2</sub>SO<sub>4</sub> and concentrated *in vacuo*, and the residue was purified by recrystallization (petroleum ether/ethyl acetate = 2:1) to give compound **13a** as off white solid (150.6 mg, 94% yield).

**(2S,3S)-2-(4-methoxyphenyl)-4-oxo-2,3,4,5-tetrahydrobenzo[b][1,4]thiazepin-3-yl acetate**

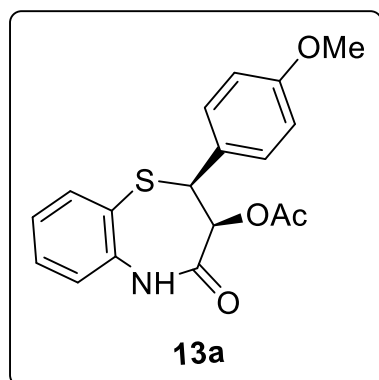

**m.p.** = 90.1-91.2 °C. **<sup>1</sup>H NMR** (400 MHz, CDCl<sub>3</sub>)  $\delta$  8.32 (s, 1H), 7.69 (d,  $J$  = 7.6 Hz, 1H), 7.49-7.38 (m, 3H), 7.28-7.17 (m, 2H), 6.85 (d,  $J$  = 8.7 Hz, 2H), 5.33 (d,  $J$  = 7.0 Hz, 1H), 5.16 (d,  $J$  = 7.0 Hz, 1H), 3.80 (s, 3H), 1.92 (s, 3H). **<sup>13</sup>C NMR** (100 MHz, CDCl<sub>3</sub>)  $\delta$  169.8, 168.8, 159.8, 140.7, 135.0, 130.60, 130.56, 127.1, 127.0, 126.9, 123.2, 113.8, 71.2, 55.3, 55.0, 20.4. **HRMS** (ESI,  $m/z$ ) calcd for C<sub>18</sub>H<sub>18</sub>NO<sub>4</sub>S [M + H]<sup>+</sup> 344.0951, found 344.0956.  $[\alpha]_D^{20}$  = +92.8 ( $c$  = 1.0, MeOH).

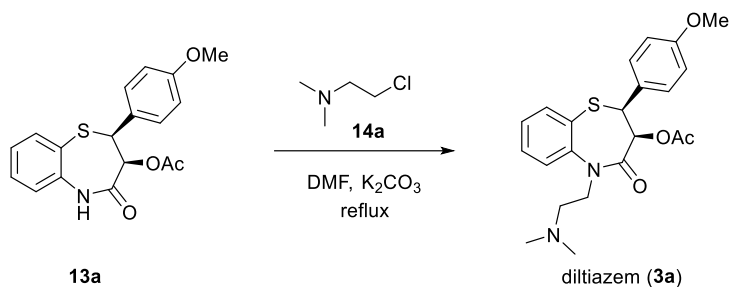

**Scheme S10. Synthesis of diltiazem (3a).**

To a solution of benzothiazepinone **13a** (100 mg, 0.29 mmol) in DMF (10 mL) was added 2-(dimethylamino) ethyl chloride (**14a**) (37.4 mg, 0.35 mmol, 1.2 equiv.). Under vigorous stirring was then added potassium carbonate (161.2 mg, 1.2 mmol, 4 equiv.). The resulting mixture was heated at reflux for 2 h. After cooling down, the reaction mixture was poured into iced water, and brine was added. This aqueous solution was extracted with ethyl acetate for three times. The combined organic layers were dried with anhydrous  $\text{Na}_2\text{SO}_4$  and concentrated *in vacuo*, and the residue was purified by recrystallization (petroleum ether/ethyl acetate = 2:1) to give diltiazem (**3a**) as off white solid (108.1 mg, 90% yield).

**(2*S*,3*S*)-5-(2-(dimethylamino)ethyl)-2-(4-methoxyphenyl)-4-oxo-2,3,4,5-tetrahydr-obenzo[*b*][1,4]thiazepin-3-yl acetate**

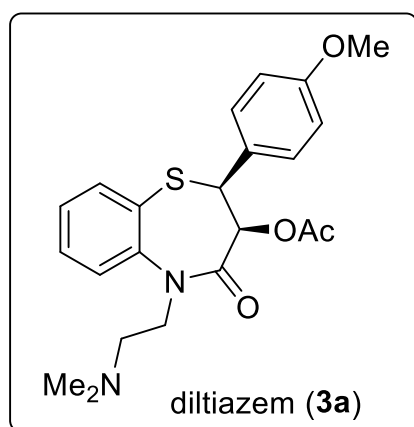

**m.p.** = 100-102 °C.  **$^1\text{H NMR}$**  (400 MHz,  $\text{CDCl}_3$ )  $\delta$  7.69 (d,  $J$  = 7.4 Hz, 1H), 7.51-7.39 (m, 4H), 7.29-7.21 (m, 1H), 6.88 (d,  $J$  = 8.7 Hz, 2H), 5.14 (d,  $J$  = 7.5 Hz, 1H), 5.00 (d,  $J$  = 7.5 Hz, 1H), 4.47-4.39 (m, 1H), 3.81 (s, 3H), 3.74-3.68 (m, 1H), 2.74-2.67 (m, 1H), 2.49-2.42 (m, 1H), 2.27 (s, 6H), 1.89 (s, 3H).  **$^{13}\text{C NMR}$**  (100 MHz,  $\text{CDCl}_3$ )  $\delta$  170.0, 166.9, 159.8, 145.5, 135.4, 131.1, 130.9, 128.7, 127.5, 126.8, 124.8, 113.8, 71.2, 56.6, 55.3, 54.4, 48.1, 45.7, 20.6. **HRMS** (ESI,  $m/z$ ) calcd for  $\text{C}_{22}\text{H}_{27}\text{N}_2\text{O}_4\text{S}$  [ $\text{M} + \text{H}$ ]<sup>+</sup> 415.1686, found 415.1694.  $[\alpha]_{\text{D}}^{20}$  = +118 ( $c$  = 1.0,  $\text{CHCl}_3$ ).

(lit.<sup>[31]</sup>:  $[\alpha]_{\text{D}}^{20}$  = +112 ( $c$  = 0.56,  $\text{CHCl}_3$ )).

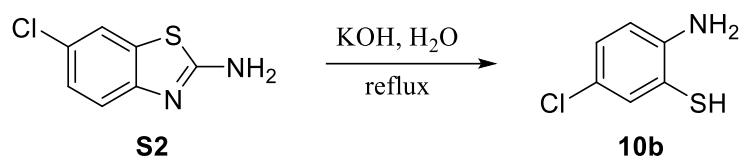

**Scheme S11. Synthesis of thiol 10b.**<sup>[7]</sup>

This is a modified literature procedure.<sup>[7]</sup> To a solution of 2-amino-6-chlorobenzothiazole (**S2**) (5 g, 27.2 mmol) in water (50 mL) was added KOH (25 g). The resulting mixture was heated under reflux until evolution of ammonia ceased. Filtered, and the filtrate was diluted with ice-cold water. Addition of acetic acid with vigorous stirring to neutralize the filtrate. The temperature of the solution was maintained at room temperature or below by adding ice to avoid the formation of decomposed, greenish mass. The precipitate thus formed was extracted three times with petroleum ether. The combined organic layers were dried with anhydrous Na<sub>2</sub>SO<sub>4</sub>, concentrated *in vacuo*, and the residue was purified by column chromatography on silica gel (petroleum ether/ethyl acetate = 20:1) to afford thiol **10b** as pale yellow solid (1.39 g, 32% yield).

**2-amino-5-chlorobenzenethiol**

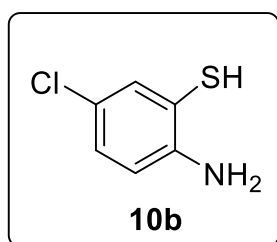

**m.p.** = 109-111 °C. **<sup>1</sup>H NMR** (400 MHz, CDCl<sub>3</sub>) δ 7.16-7.09 (m, 2H), 6.65 (dt, *J* = 9.0, 1.3 Hz, 1H), 4.32 (s, 2H), 1.57 (s, 1H). **<sup>13</sup>C NMR** (100 MHz, CDCl<sub>3</sub>) δ 147.3, 135.8, 131.8, 122.4, 119.5, 116.4.

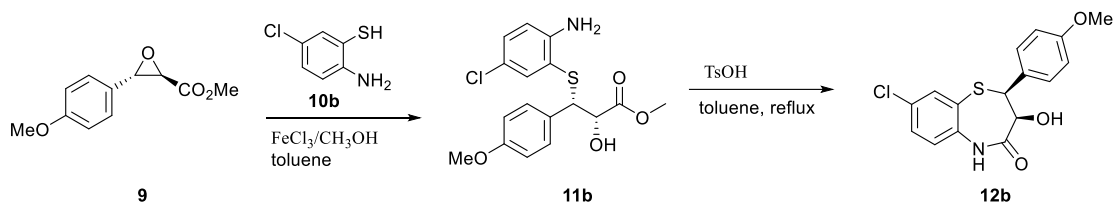

**Scheme S12. Synthesis of benzothiazepinones 12b.**<sup>[3,5,6]</sup>

This is a modified literature procedure.<sup>[3,5,6]</sup> A solution of *trans*-methyl glycidate **9** (100 mg, 0.48 mmol) in toluene (10 mL) was heated at reflux. Aminothiophenol **10b** (84.2 mg, 0.53 mmol, 1.1 equiv.) and a solution of FeCl<sub>3</sub>·6H<sub>2</sub>O (0.013 mg, 4.8×10<sup>-5</sup> mmol, 10<sup>-4</sup> equiv.) in MeOH (4.8 μL) were added, and the resulting mixture was stirred at reflux for 4 h. Then, *p*-toluenesulfonic acid (1.72 mg, 0.01 mmol, 0.02 equiv.) was added and the reflux continued for an additional 7 h. After cooling down, the solvent was concentrated *in vacuo*, and the residue was purified by recrystallization (petroleum ether/ethyl acetate = 2:1) to give compound **12b** as pale yellow solid (109.8 mg, 68% yield).

**(2*S*,3*S*)-8-chloro-3-hydroxy-2-(4-methoxyphenyl)-2,3-dihydrobenzo[*b*][1,4]thiazepine-4(5*H*)-one**

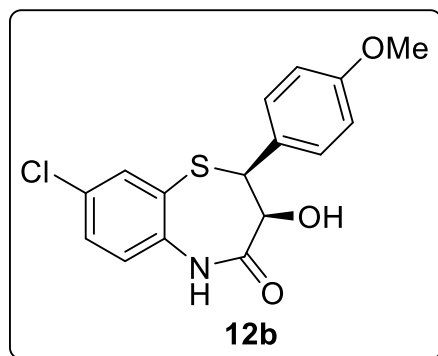

**m.p.** = 238.7-239.4 °C. **<sup>1</sup>H NMR** (400 MHz, DMSO-*d*<sub>6</sub>) δ 10.34 (s, 1H), 7.64 (d, *J* = 2.4 Hz, 1H), 7.48 (dd, *J* = 8.5, 2.5 Hz, 1H), 7.41-7.29 (m, 2H), 7.15 (d, *J* = 8.6 Hz, 1H), 6.95-6.78 (m, 2H), 5.08 (d, *J* = 6.5 Hz, 1H), 4.91 (s, 1H), 4.32 (d, *J* = 6.5 Hz, 1H), 3.75 (s, 3H). **<sup>13</sup>C NMR** (100 MHz, DMSO-*d*<sub>6</sub>) δ 173.0, 159.5, 141.5, 133.2, 131.3, 130.1, 129.1, 128.9, 128.8, 124.4, 113.8, 70.6, 57.6, 55.6. **HRMS** (ESI, *m/z*) calcd for C<sub>16</sub>H<sub>14</sub>ClNNaO<sub>3</sub>S [M + Na]<sup>+</sup> 358.0275, found

358.0281. [α]<sub>D</sub><sup>20</sup> = +51.9 (c = 0.2, DMSO).



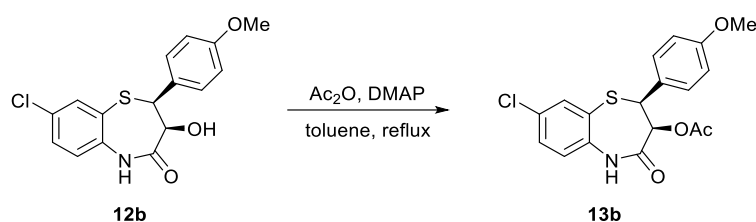

**Scheme S13. Synthesis of compound 13b.**

A mixture of benzothiazepinone **12b** (234.5 mg, 0.7 mmol), DMAP (8.56 mg, 0.07 mmol, 0.1 equiv.), and Ac<sub>2</sub>O (78.9  $\mu$ L, 0.84 mmol, 1.2 equiv.) in toluene (25 mL) was heated at reflux for 2 h. After cooling down, the toluene layer was separated and the aqueous layer was extracted with ethyl acetate. The combined organic layers were dried with anhydrous Na<sub>2</sub>SO<sub>4</sub> and concentrated *in vacuo*, and the residue was purified by recrystallization (petroleum ether/ethyl acetate = 2:1) to give compound **13b** as pale yellow solid (202.9 mg, 77% yield).

**(2S,3S)-8-chloro-2-(4-methoxyphenyl)-4-oxo-2,3,4,5-tetrahydrobenzo[b][1,4]thiazepin-3-yl acetate**

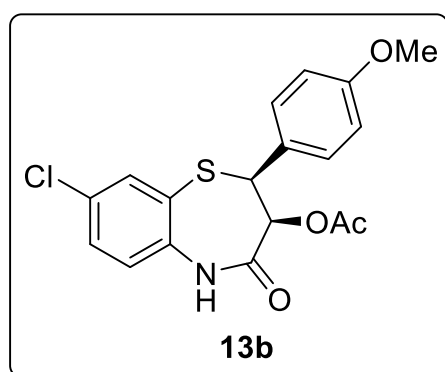

**m.p.** = 111.3-114.0 °C. **<sup>1</sup>H NMR** (400 MHz, CDCl<sub>3</sub>)  $\delta$  8.52 (s, 1H), 7.69 (d, *J* = 2.4 Hz, 1H), 7.47-7.38 (m, 2H), 7.37 (dd, *J* = 8.5, 2.4 Hz, 1H), 7.13 (d, *J* = 8.5 Hz, 1H), 6.88-6.77 (m, 2H), 5.30 (d, *J* = 6.9 Hz, 1H), 5.16 (d, *J* = 7.0 Hz, 1H), 3.79 (s, 3H), 1.93 (s, 3H). **<sup>13</sup>C NMR** (100 MHz, CDCl<sub>3</sub>)  $\delta$  169.9, 168.9, 160.1, 139.4, 134.5, 132.0, 130.7, 130.7, 128.9, 126.5, 124.4, 114.0, 71.2, 55.4, 55.1, 20.6. **HRMS** (ESI, *m/z*) calcd for C<sub>18</sub>H<sub>16</sub>ClNNaO<sub>4</sub>S [M + Na]<sup>+</sup> 400.0381, found

400.0374.  $[\alpha]_D^{20}$  = +28.23 (*c* = 0.4, MeOH).

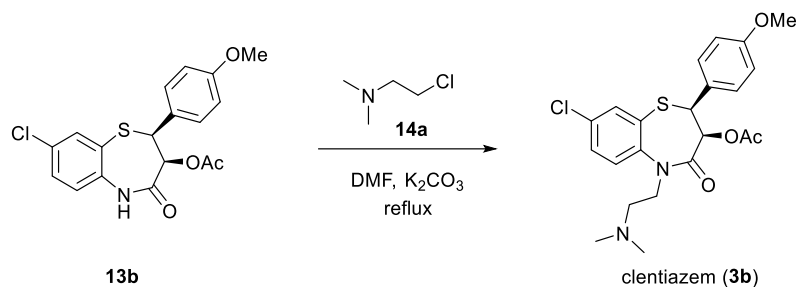

**Scheme S14. Synthesis of clentiazem (3b).**

To a solution of benzothiazepinone **13b** (109.3 mg, 0.29 mmol) in DMF (10 mL) was added 2-(dimethylamino)ethyl chloride (**14a**) (37.4 mg, 0.35 mmol, 1.2 equiv.). Under vigorous stirring was then added potassium carbonate (161.2 mg, 1.2 mmol, 4 equiv.). The resulting mixture was heated at reflux for 2 h. After cooling down, the reaction mixture was poured into iced water, and brine was added. The combined organic layers were dried with anhydrous Na<sub>2</sub>SO<sub>4</sub> and concentrated *in vacuo*, and the residue was purified by recrystallization (petroleum ether/ethyl acetate = 2:1) to give clentiazem (**3b**) as off white solid (111.3 mg, 85% yield).

**(2*S*,3*S*)-8-chloro-5-(2-(dimethylamino)ethyl)-2-(4-methoxyphenyl)-4-oxo-2,3,4,5-tetrahydrobenzo[*b*][1,4]hiazepine-3-yl acetate**

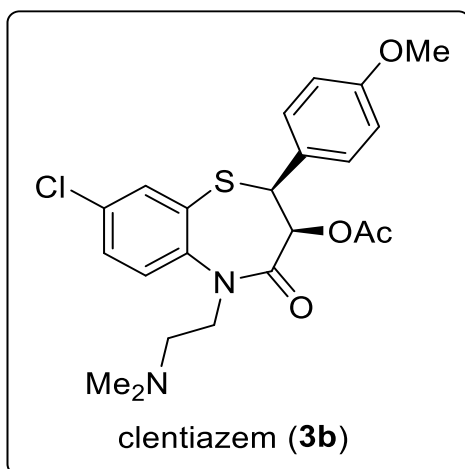

**m.p.** = 127.4-129.1 °C. **<sup>1</sup>H NMR** (400 MHz, CDCl<sub>3</sub>) δ 7.67 (s, 1H), 7.50-7.36 (m, 4H), 6.87 (d, *J* = 8.3 Hz, 2H), 5.11 (d, *J* = 7.5 Hz, 1H), 4.99 (d, *J* = 7.5 Hz, 1H), 4.42-4.27 (m, 1H), 3.78 (s, 3H), 3.75-3.65 (m, 1H), 2.75-2.64 (m, 1H), 2.50-2.39 (m, 1H), 2.26 (s, 6H), 1.88 (s, 3H). **<sup>13</sup>C NMR** (100 MHz, CDCl<sub>3</sub>) δ 169.8, 166.7, 159.9, 144.1, 134.8, 132.4, 131.1, 130.8, 130.2, 126.2, 125.9, 113.8, 70.8, 56.5, 55.2, 54.4, 47.9, 45.4, 20.5. **HRMS** (ESI, *m/z*) calcd for C<sub>22</sub>H<sub>26</sub>ClN<sub>2</sub>O<sub>4</sub>S [M + H]<sup>+</sup> 449.1296, found 449.1281. [α]<sub>D</sub><sup>20</sup> = +49.25 (c = 0.4, MeOH).

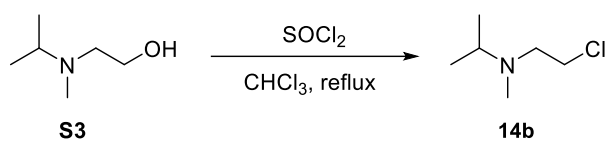

**Scheme S15. Synthesis of amino chloride 14b.**<sup>[8]</sup>

This is a modified literature procedure.<sup>[8]</sup> 2-(Isopropyl(methyl)amino)ethan-1-ol (**S3**) (936 mg, 8 mmol) was first dissolved in chloroform (12 mL) and stirred in an ice-cold bath, to which 0.84 mL of thionyl chloride (12 mmol, 1.5 equiv.) in chloroform (2.4 mL) was added dropwise over 30 min. The resulting mixture was heated to reflux for 4 h. The solvent was then evaporated *in vacuo* and the solid remained was re-dissolved in ethanol and precipitated into diethyl ether. The resultant light yellow solid was filtrated, washed with diethyl ether, and used for the next reaction without further purification.

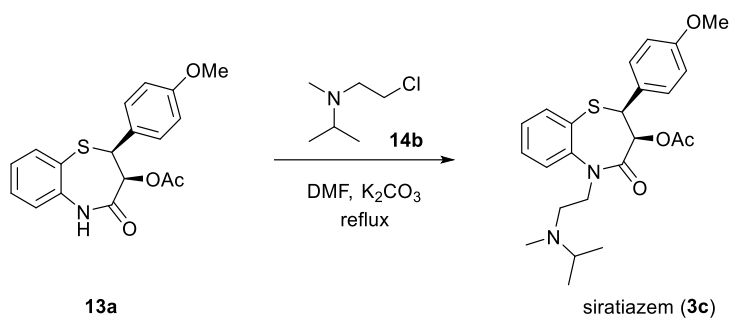

**Scheme S16. Synthesis of siratiazem (3c).**

To a solution of benzothiazepinone **13a** (100 mg, 0.29 mmol) in DMF (10 mL) was added amino chloride (**14b**) (156.6 mg, 1.16 mmol, 4.0 equiv.). Under vigorous stirring was then added potassium carbonate (162 mg, 1.2 mmol, 4 equiv.). The resulting mixture was heated at reflux for 2 h. After cooling down, the reaction mixture was poured into iced water, and brine was added. The combined organic layers were dried with anhydrous  $\text{Na}_2\text{SO}_4$  and concentrated *in vacuo*, and the residue was purified by recrystallization (petroleum ether/ethyl acetate = 2:1) to give siratiazem (**3c**) as off white solid (93.2 mg, 73% yield).

**(2S,3S)-5-(2-(isopropyl(methyl)amino)ethyl)-2-(4-methoxyphenyl)-4-oxo-2,3,4,5-tetrahydrobenzo[b][1,4]thiazepine-3-yl acetate**

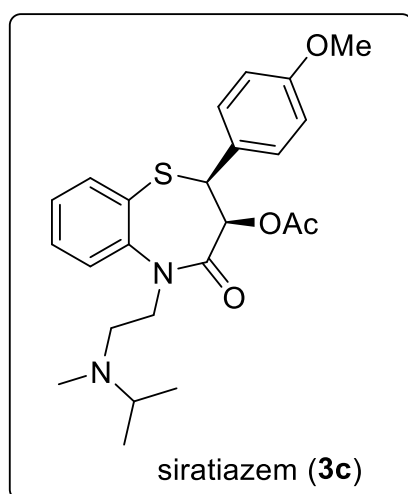

**$^1\text{H NMR}$**  (400 MHz,  $\text{CDCl}_3$ )  $\delta$  7.58 (d,  $J = 7.7$  Hz, 1H), 7.43 (d,  $J = 8.1$  Hz, 2H), 7.34 (t,  $J = 7.7$  Hz, 1H), 7.11 (d,  $J = 7.9$  Hz, 1H), 7.03 (t,  $J = 7.6$  Hz, 1H), 6.87 (d,  $J = 8.3$  Hz, 2H), 5.46-5.23 (m, 2H), 4.55-4.43 (m, 2H), 3.82 (s, 3H), 3.01-2.91 (m, 1H), 2.90-2.80 (m, 2H), 2.33 (s, 3H), 1.77 (s, 3H), 1.05 (d,  $J = 6.6$  Hz, 6H).  **$^{13}\text{C NMR}$**  (100 MHz,  $\text{CDCl}_3$ )  $\delta$  169.6, 161.8, 159.7, 149.5, 134.1, 130.5, 130.1, 128.6, 124.8, 124.5, 124.4, 113.6, 71.7, 65.0, 60.4, 55.4, 54.1, 51.1, 37.6, 20.4, 18.0. **HRMS** (ESI,  $m/z$ ) calcd for  $\text{C}_{24}\text{H}_{30}\text{N}_2\text{O}_4\text{SNa}$   $[\text{M} + \text{Na}]^+$  465.1818, found 465.1820.  $[\alpha]_{\text{D}}^{20} = +244.8$  ( $c = 0.2$ , MeOH).

## References

- [1] Z. Wang, Y. Zeng, X. Wu, Z. Li, Y. Tao, X. Yu, Z. Huang and F. Chen, *Org. Biomol. Chem.*, 2020, **18**, 2672-2677.
- [2] Z. Wang, X. Wu, Z. Li, Z. Huang and F. Chen, *Org. Biomol. Chem.*, 2019, **17**, 3575-3580.
- [3] C. Mordant, C. C. de Andrade, R. Touati, V. Ratovelomanana-Vidal, B. B. Hassine and J.-P. Genêt, *Synthesis*, 2003, 2405-2409.
- [4] T. Fukuyama, M. Tokizane, A. Matsui and I. Ryu, *React. Chem. Eng.*, 2016, **1**, 613-615.
- [5] A. Schwartz, P. B. Madan, E. Mohacsi, J. P. O'Brien, L. J. Todaro and D. L. Coffen, *J. Org. Chem.*, 1992, **57**, 851-856.
- [6] B. M. Adger, J. V. Barkley, S. Bergeron, M. W. Cappi, B. E. Flowerdew, M. P. Jackson, R. McCague, T. C. Nugent and S. M. Roberts, *J. Chem. Soc., Perkin Trans.*, 1997, **1**, 3501-3507.
- [7] S. Mor and S. Sindhu, *RSC Adv.*, 2019, **9**, 12784-12792.
- [8] C. Xiao, Y. Cheng, Y. Zhang, J. Ding, C. He, X. Zhuang and X. Chen, *J. Polym. Sci. Pol. Chem.*, 2014, **52**, 671-679.

The  $^1\text{H}$  NMR (400 MHz,  $\text{CDCl}_3$ ) Spectrum of **S1**

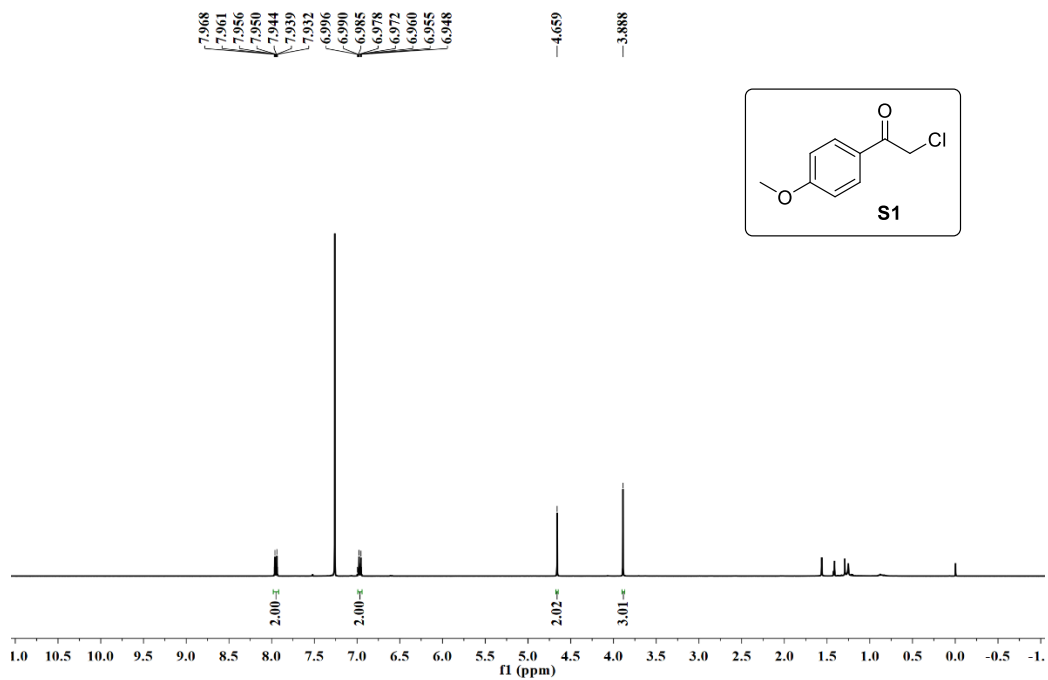

The  $^{13}\text{C}$  NMR (100 MHz,  $\text{CDCl}_3$ ) Spectrum of **S1**

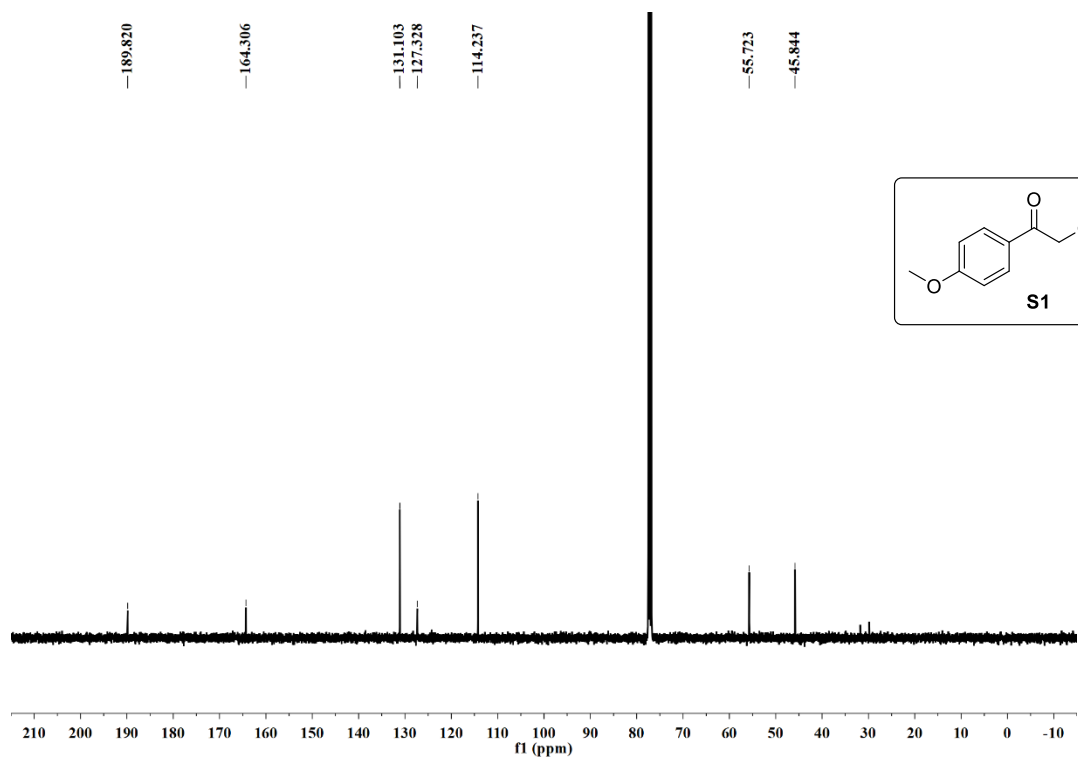

The  $^1\text{H}$  NMR (400 MHz,  $\text{CDCl}_3$ ) Spectrum of **6a**

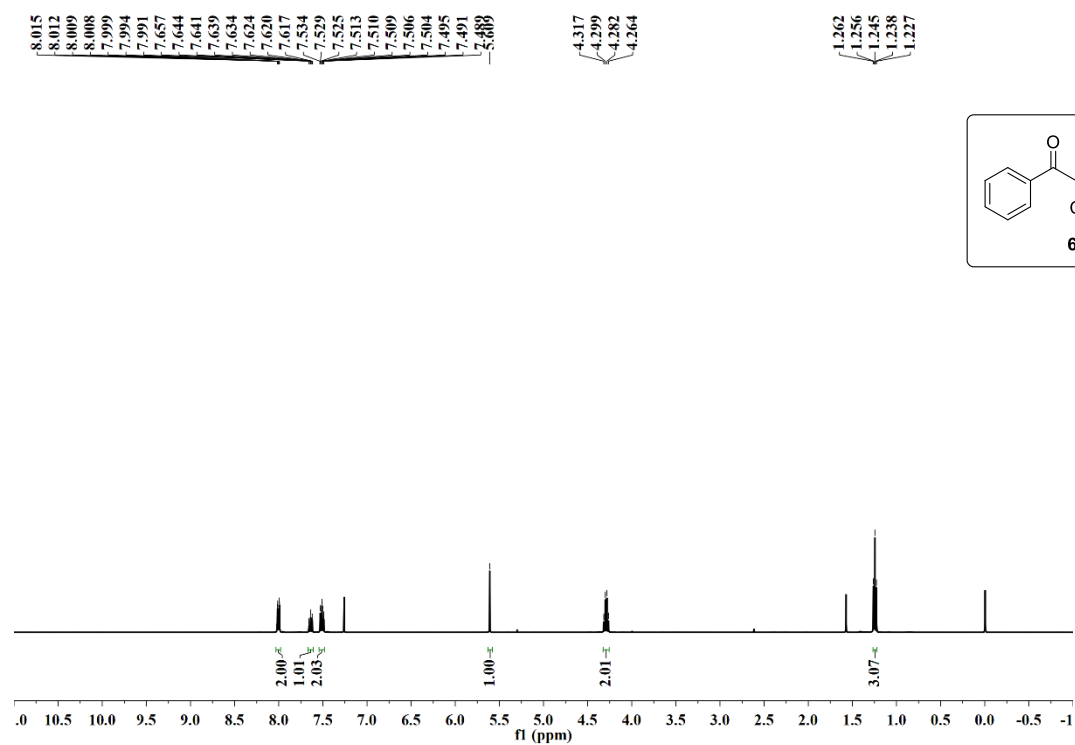

The  $^{13}\text{C}$  NMR (100 MHz,  $\text{CDCl}_3$ ) Spectrum of **6a**

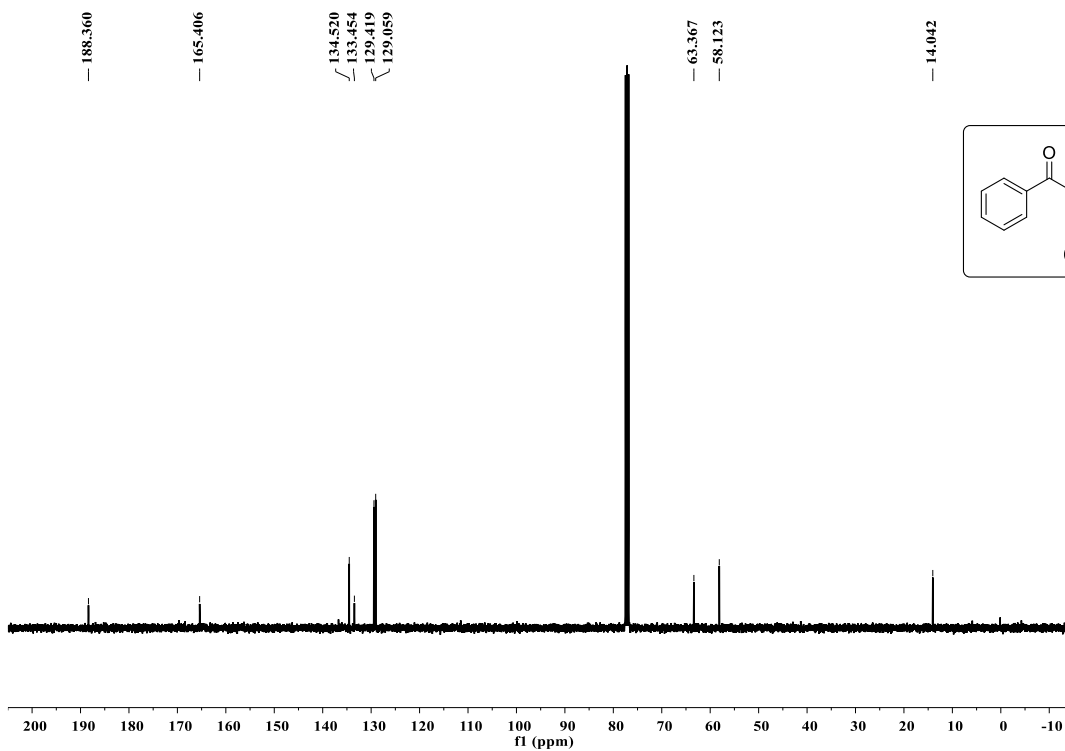

The  $^1\text{H}$  NMR (400 MHz,  $\text{CDCl}_3$ ) Spectrum of **6b**

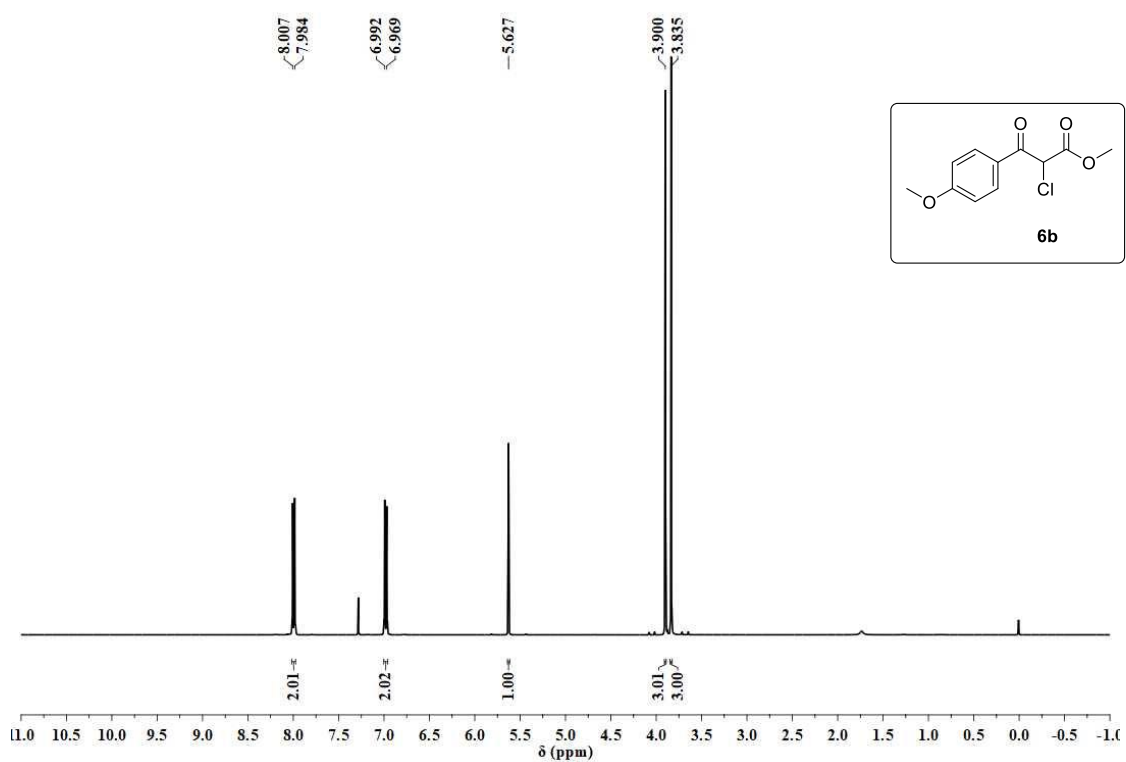

The  $^{13}\text{C}$  NMR (100 MHz,  $\text{CDCl}_3$ ) Spectrum of **6b**

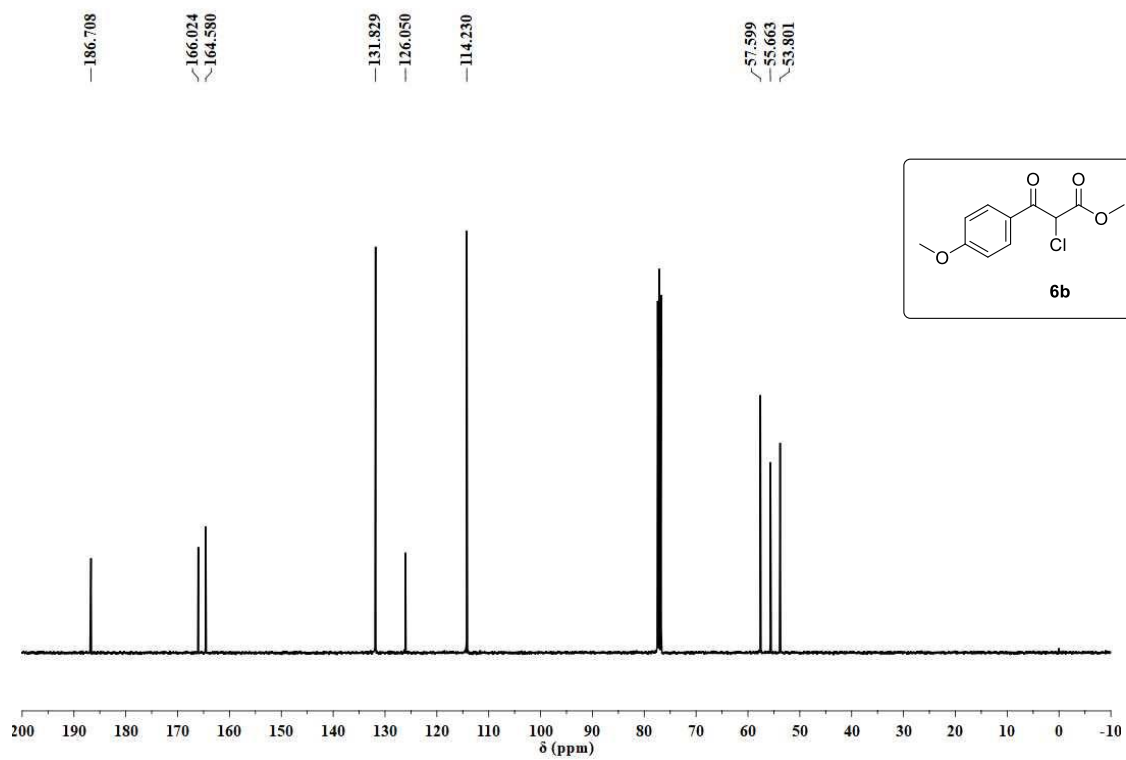



The  $^1\text{H}$  NMR (400 MHz,  $\text{CDCl}_3$ ) Spectrum of **6c**

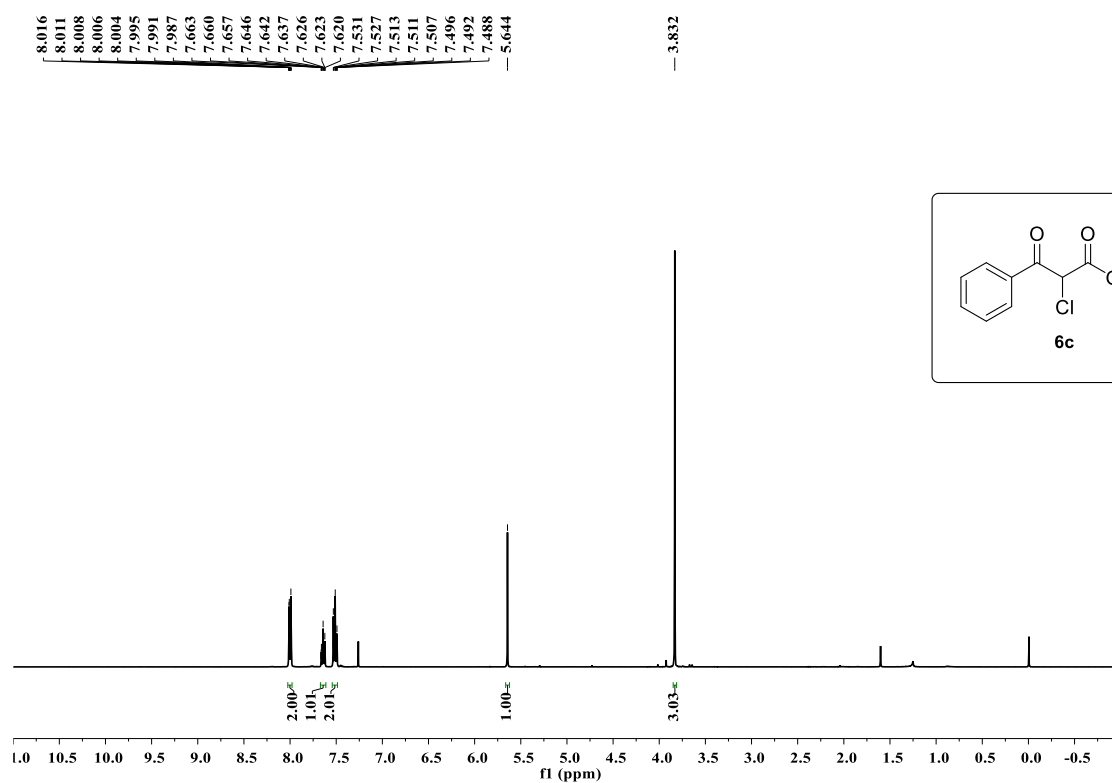

The  $^{13}\text{C}$  NMR (100 MHz,  $\text{CDCl}_3$ ) Spectrum of **6c**

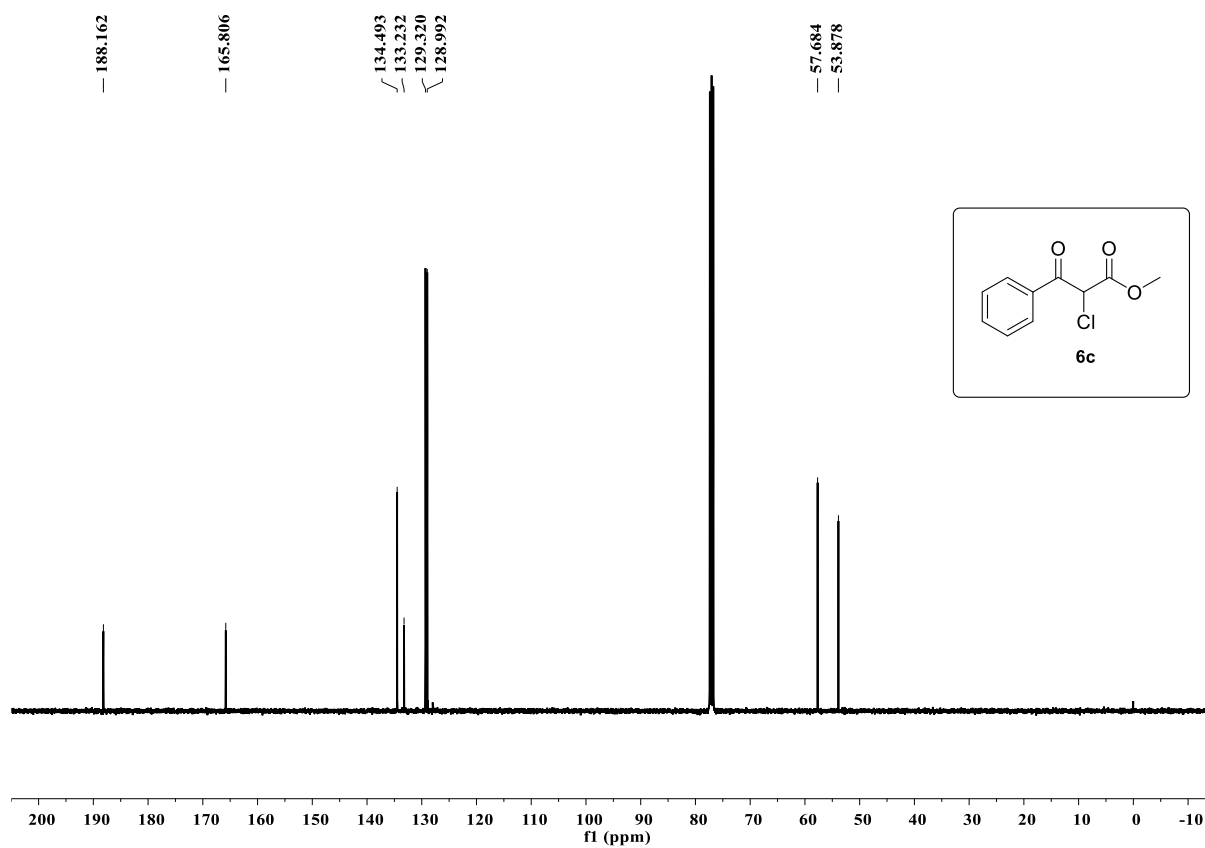

The  $^1\text{H}$  NMR (400 MHz,  $\text{CDCl}_3$ ) Spectrum of **6d**

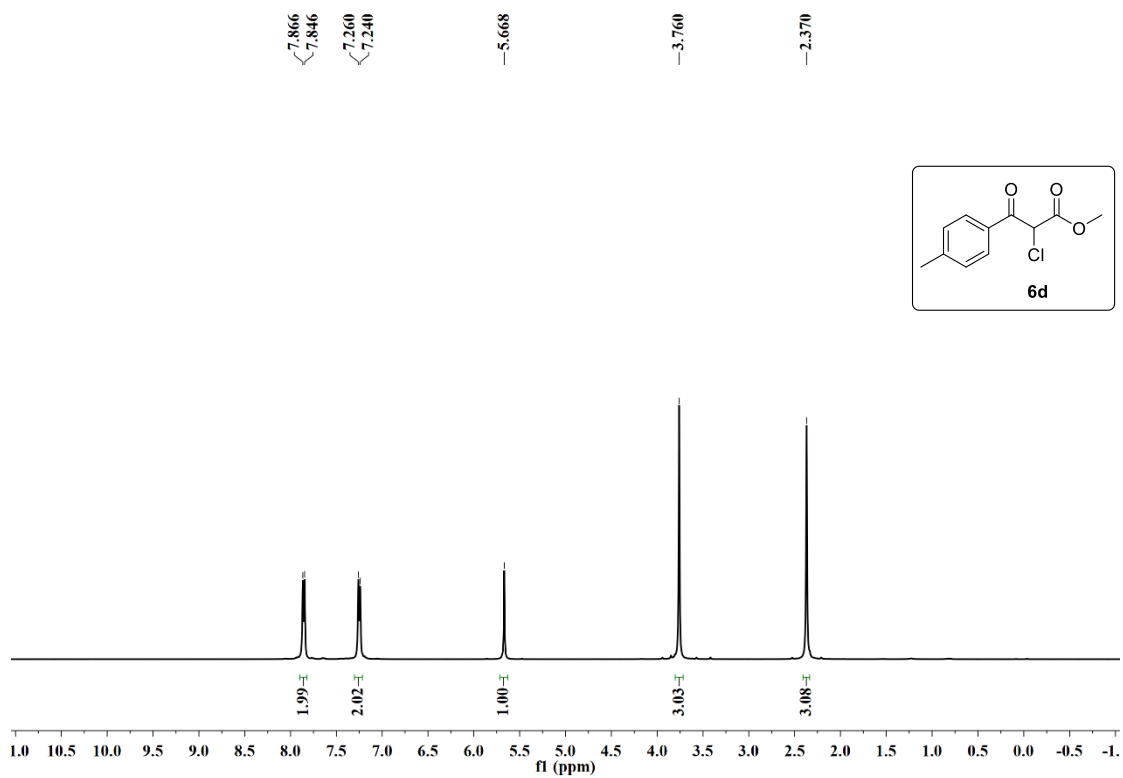

The  $^{13}\text{C}$  NMR (100 MHz,  $\text{CDCl}_3$ ) Spectrum of **6d**

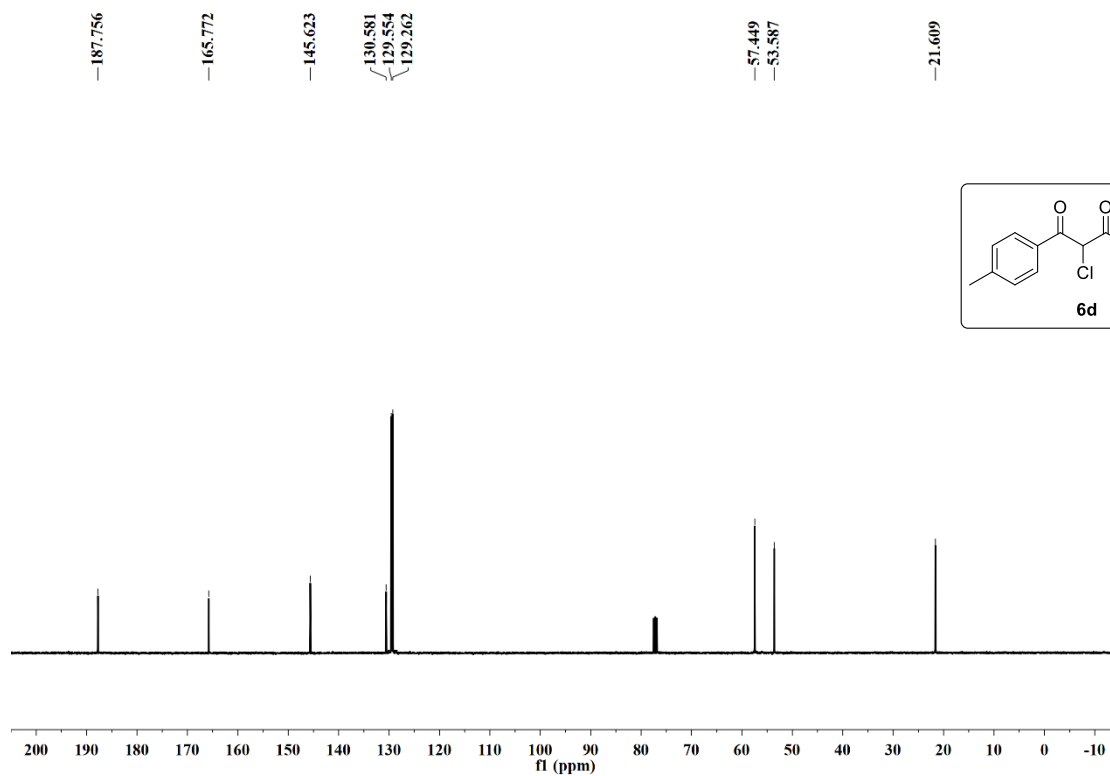

The  $^1\text{H}$  NMR (400 MHz,  $\text{CDCl}_3$ ) Spectrum of **6e**

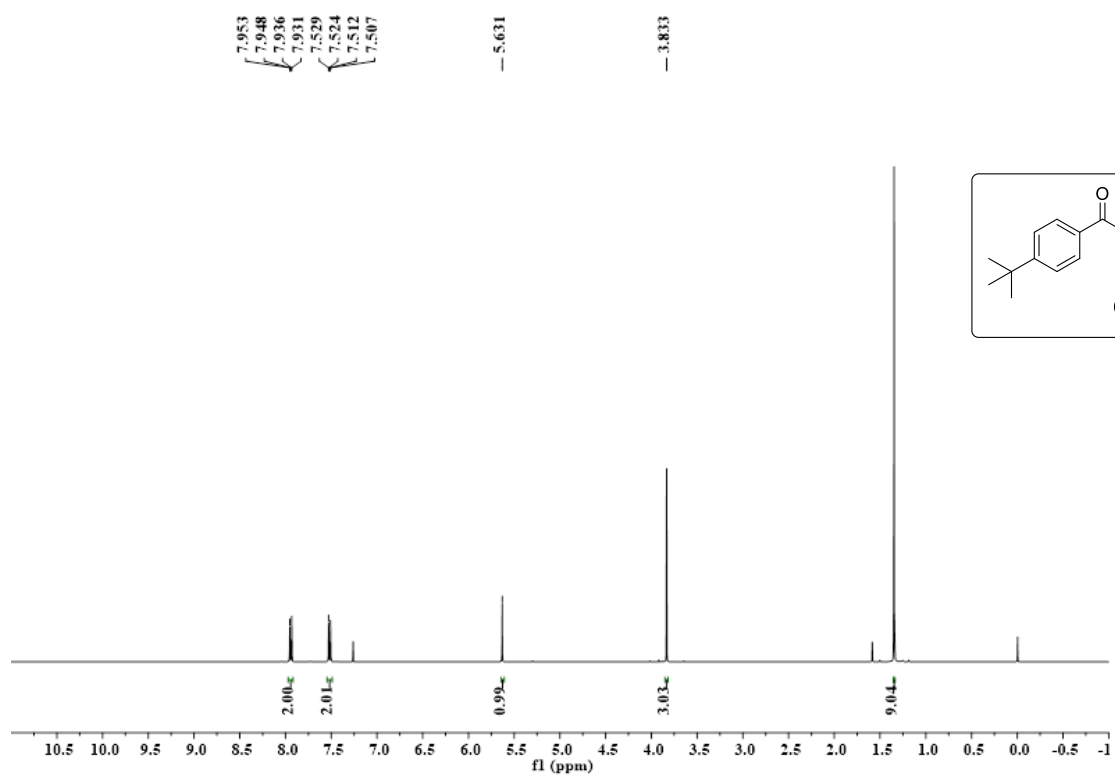

The  $^{13}\text{C}$  NMR (100 MHz,  $\text{CDCl}_3$ ) Spectrum of **6e**

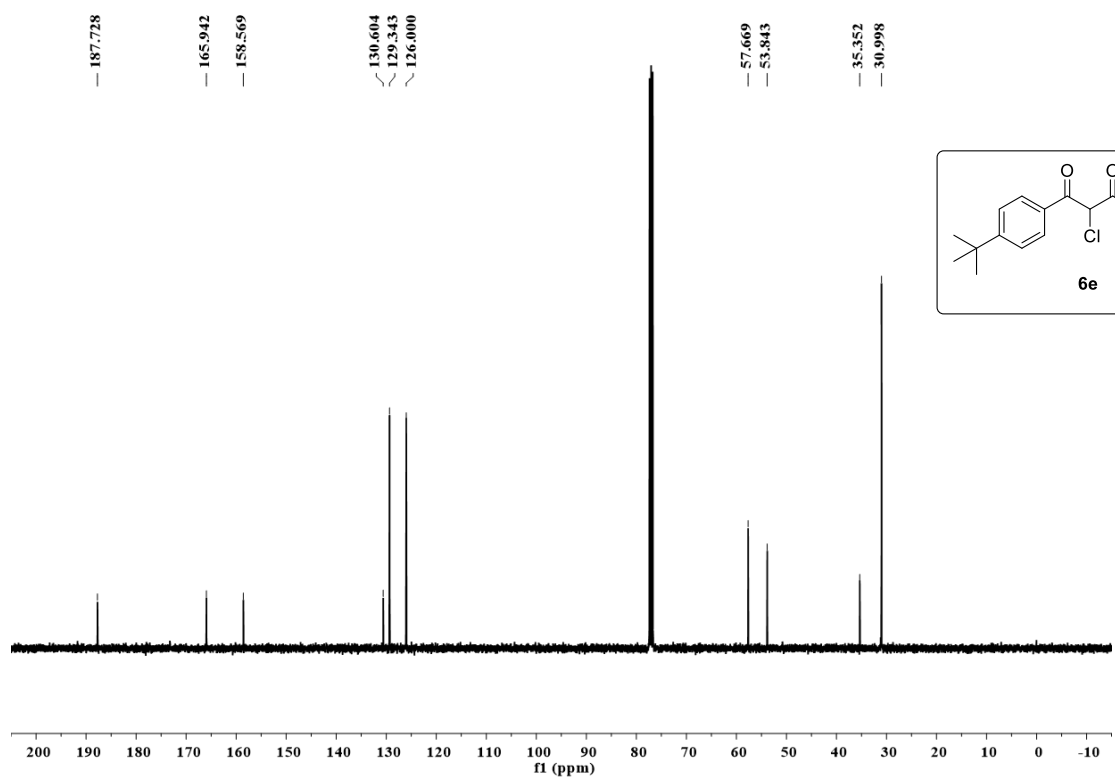

The  $^1\text{H}$  NMR (400 MHz,  $\text{CDCl}_3$ ) Spectrum of **6f**

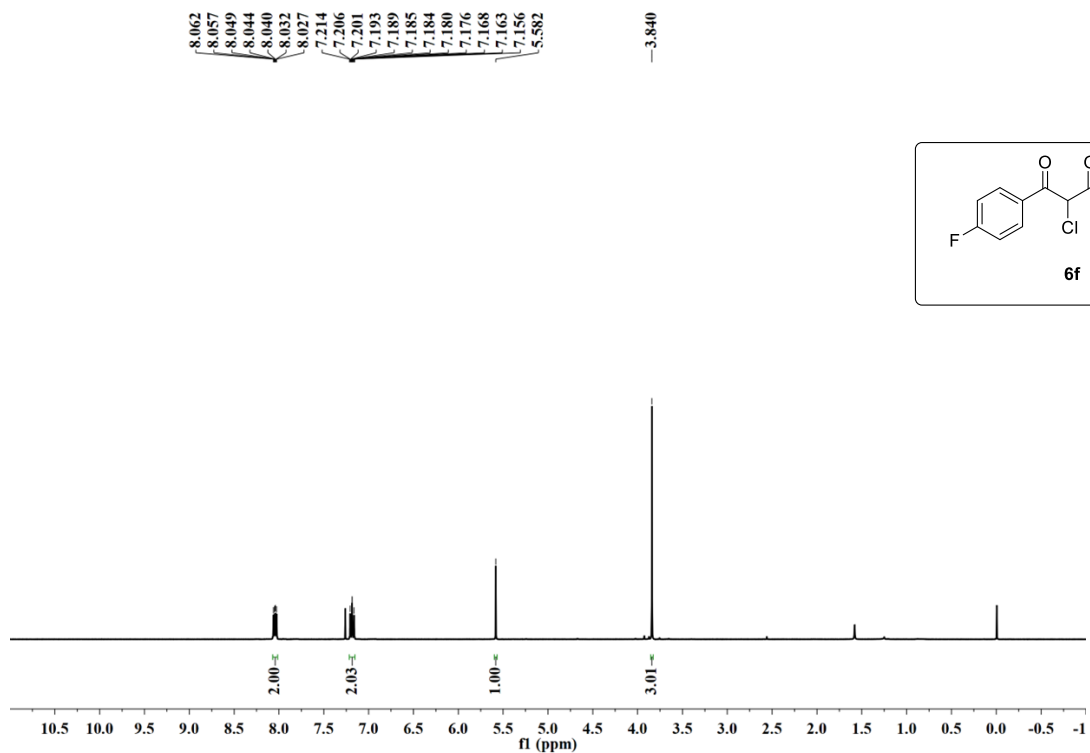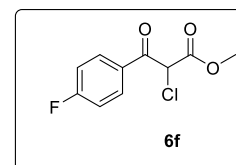

The  $^{13}\text{C}$  NMR (100 MHz,  $\text{CDCl}_3$ ) Spectrum of **6f**

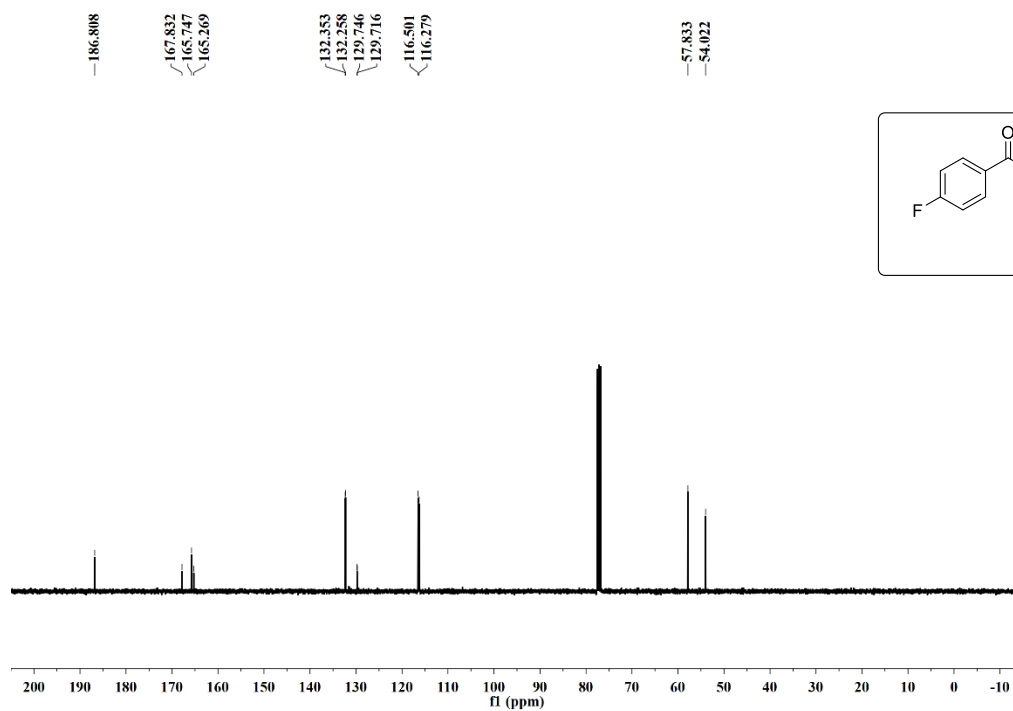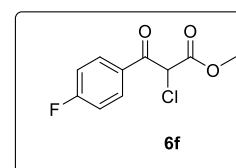

The  $^1\text{H}$  NMR (400 MHz,  $\text{CDCl}_3$ ) Spectrum of **6g**

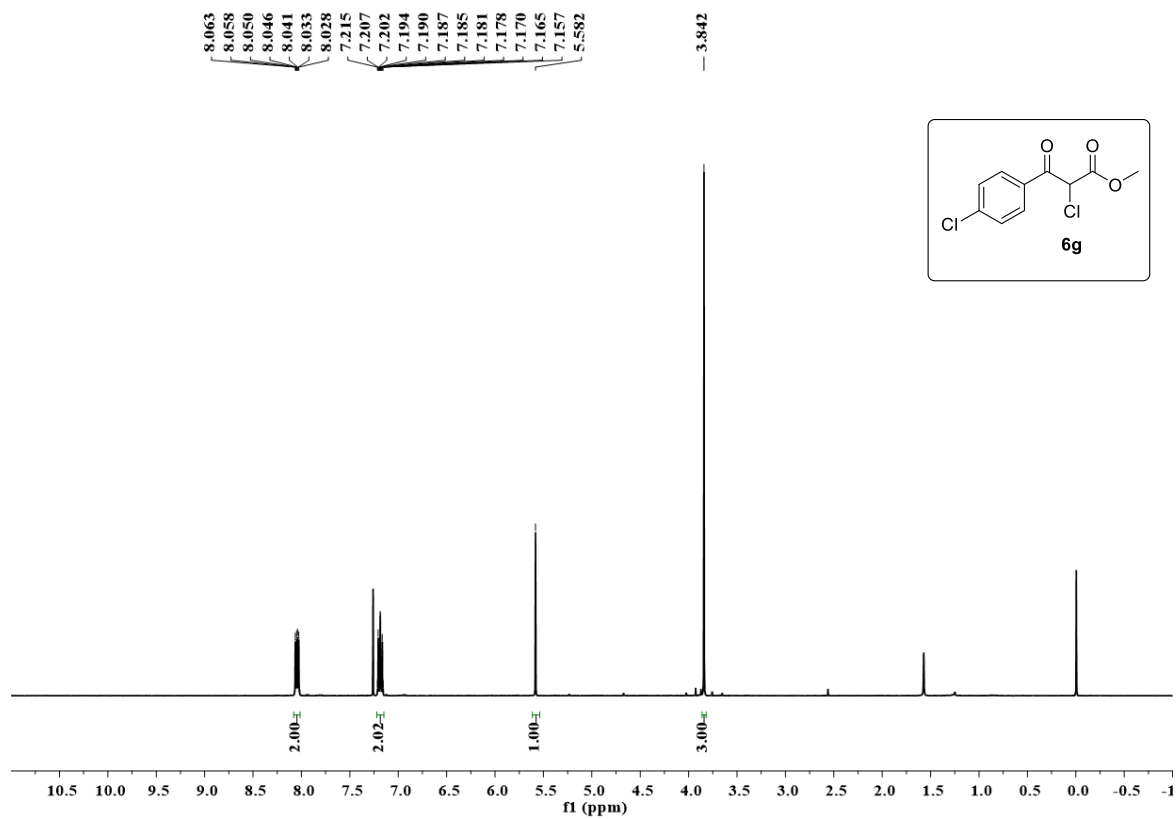

The  $^{13}\text{C}$  NMR (100 MHz,  $\text{CDCl}_3$ ) Spectrum of **6g**

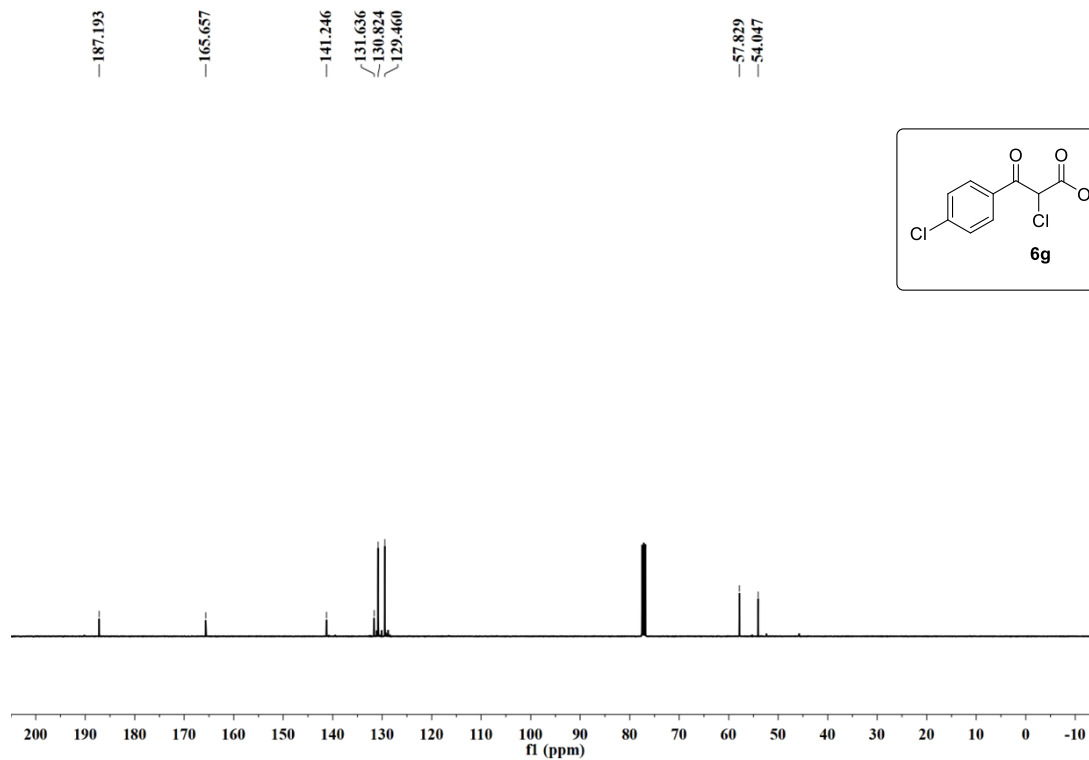

The  $^1\text{H}$  NMR (400 MHz,  $\text{CDCl}_3$ ) Spectrum of **6h**

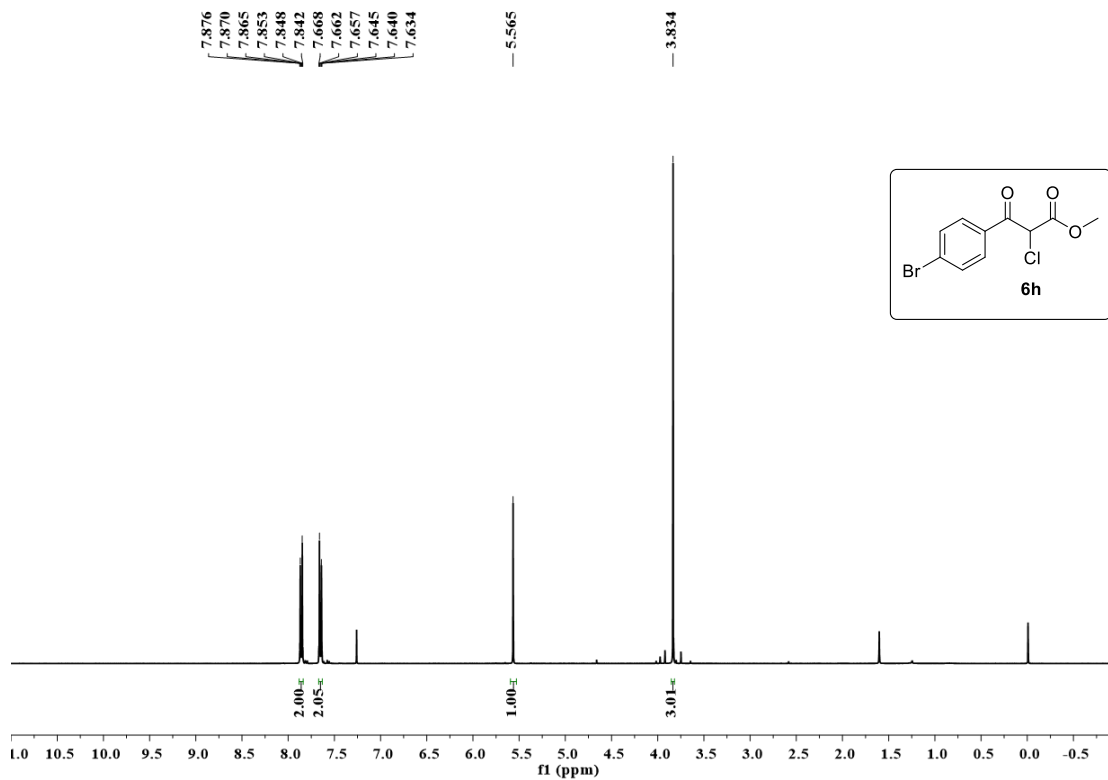

The  $^{13}\text{C}$  NMR (100 MHz,  $\text{CDCl}_3$ ) Spectrum of **6h**

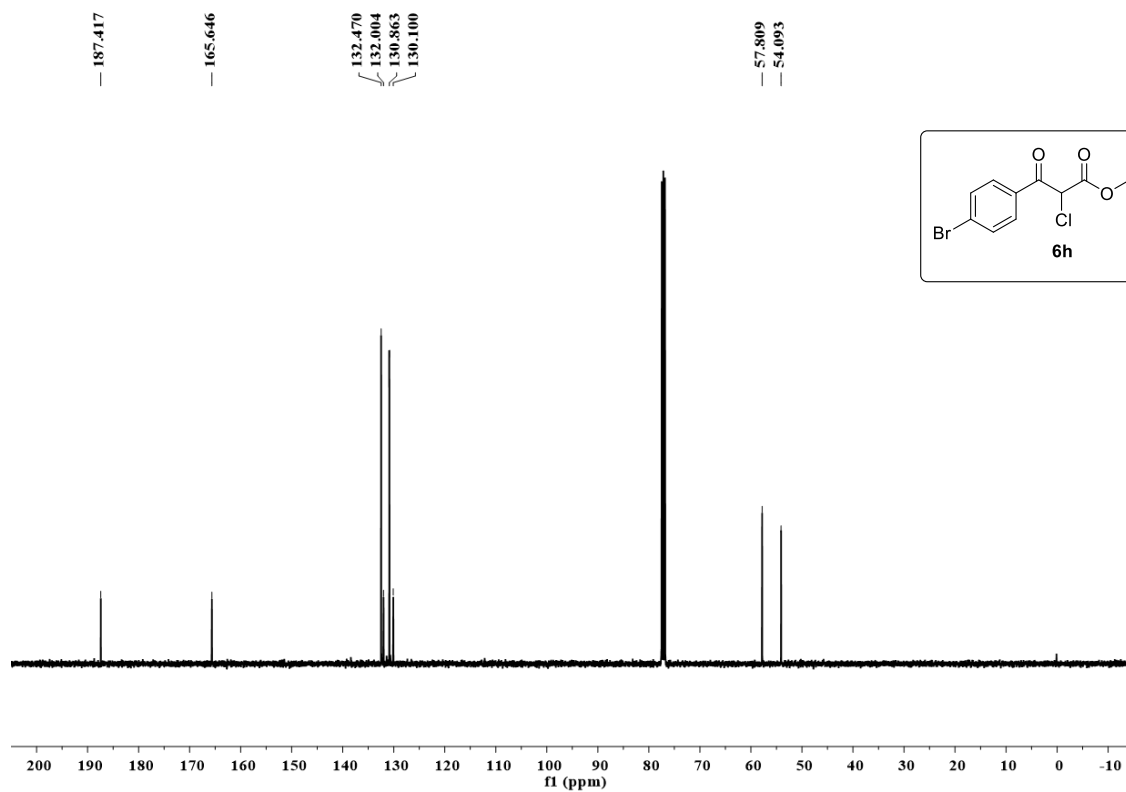

The  $^1\text{H}$  NMR (400 MHz,  $\text{CDCl}_3$ ) Spectrum of **6i**

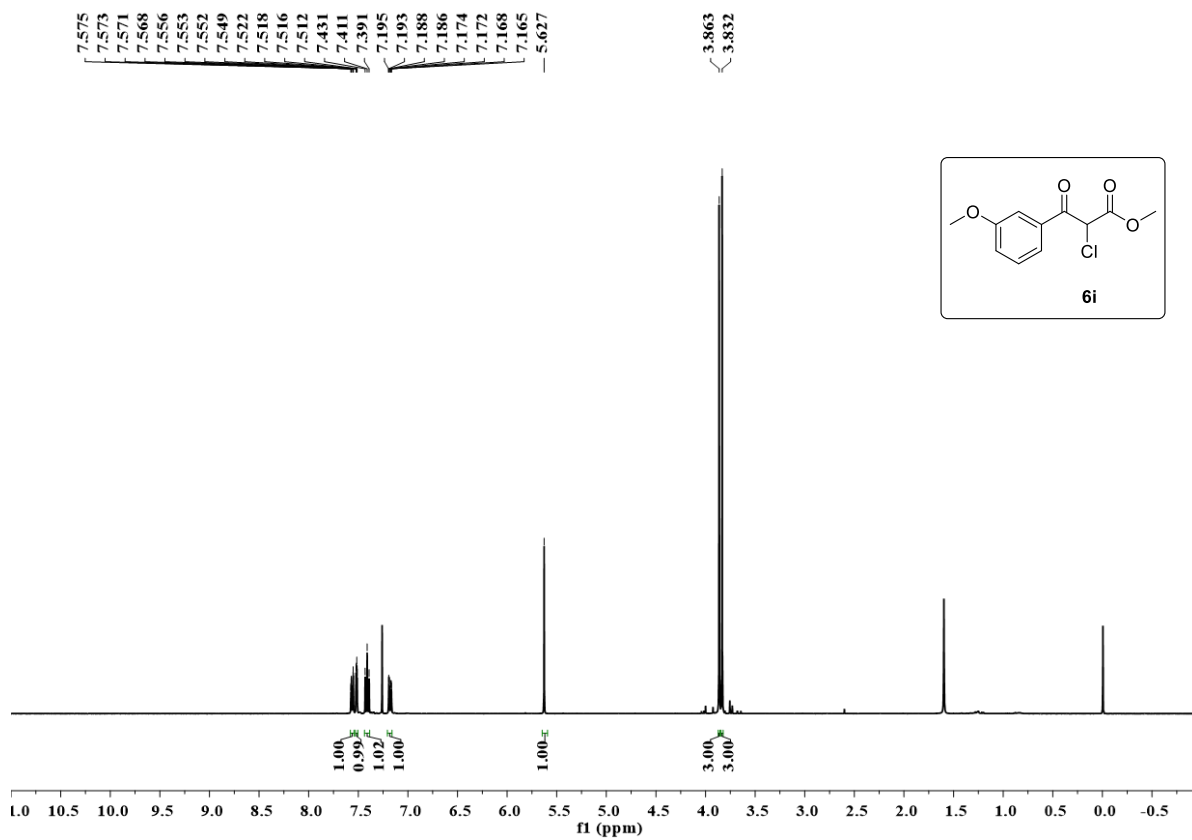

The  $^{13}\text{C}$  NMR (100 MHz,  $\text{CDCl}_3$ ) Spectrum of **6i**

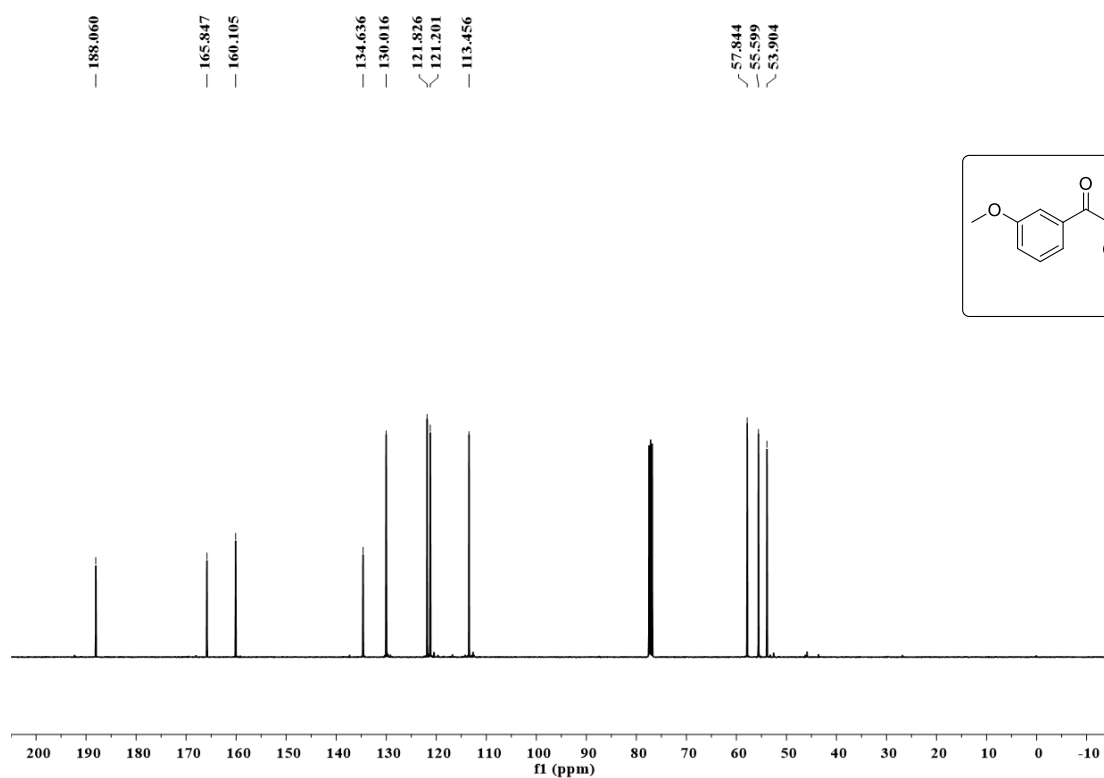

The  $^1\text{H}$  NMR (400 MHz,  $\text{CDCl}_3$ ) Spectrum of **6j**

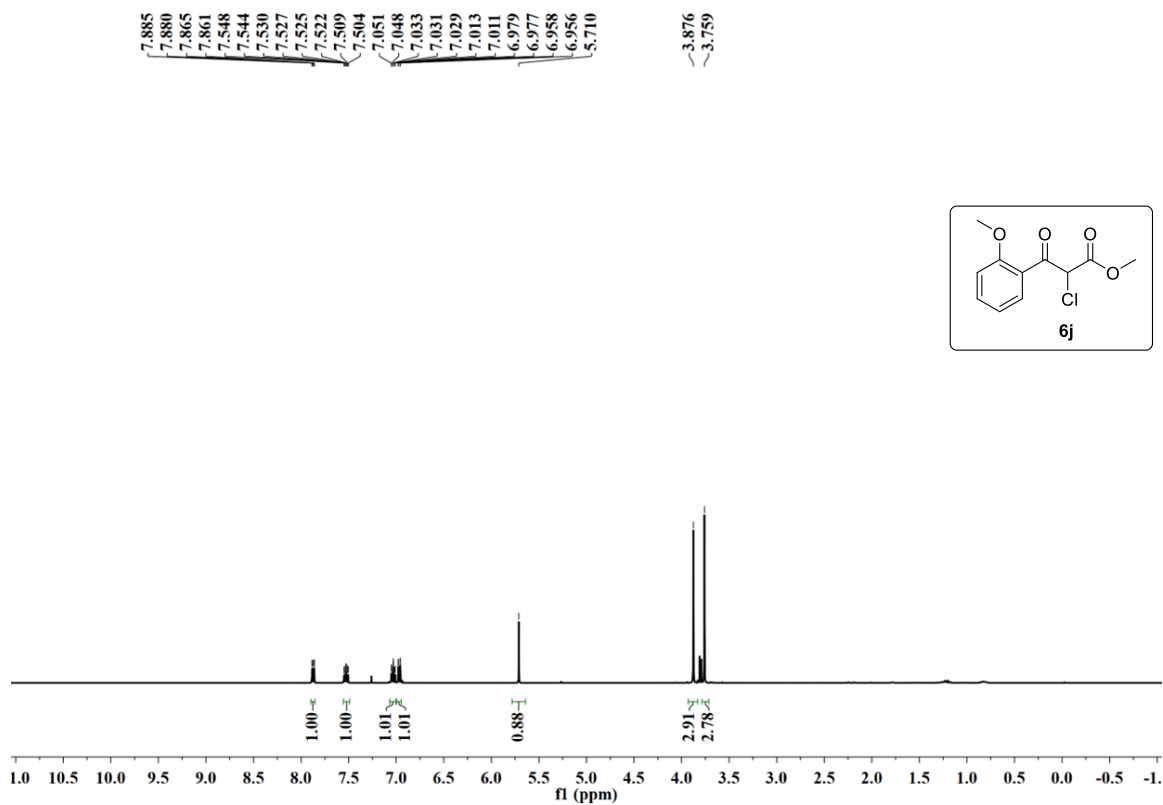

The  $^{13}\text{C}$  NMR (100 MHz,  $\text{CDCl}_3$ ) Spectrum of **6j**

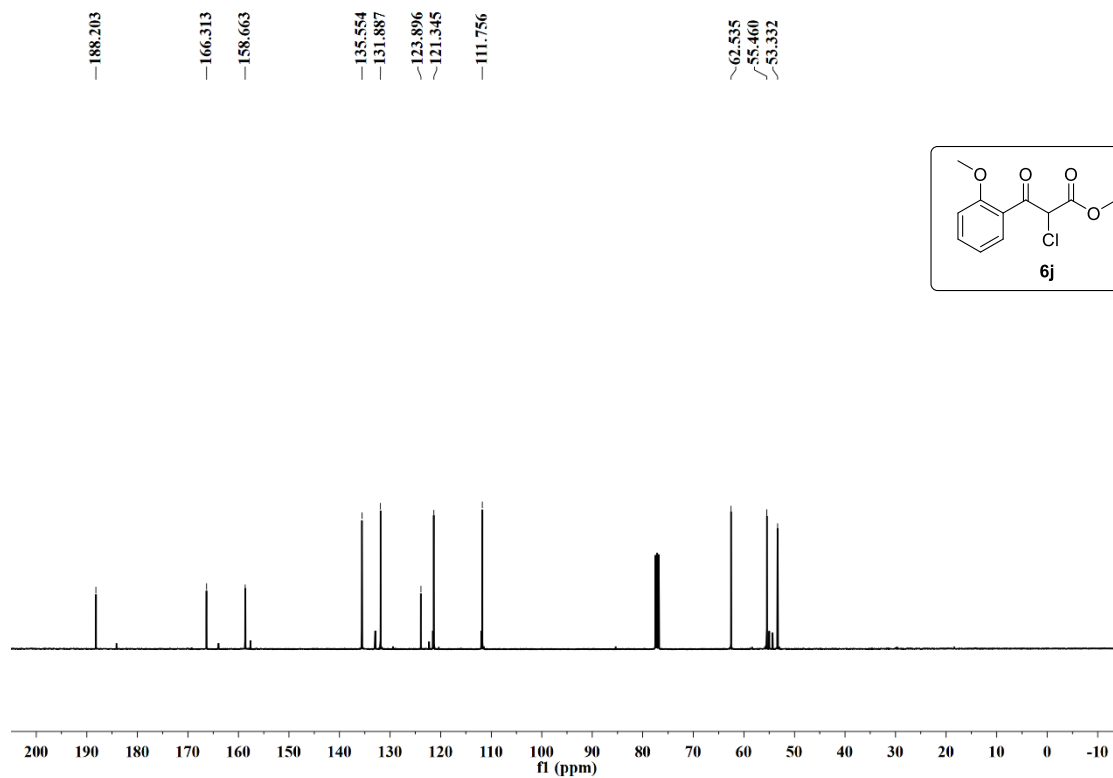



The  $^1\text{H}$  NMR (400 MHz,  $\text{CDCl}_3$ ) Spectrum of **6k**

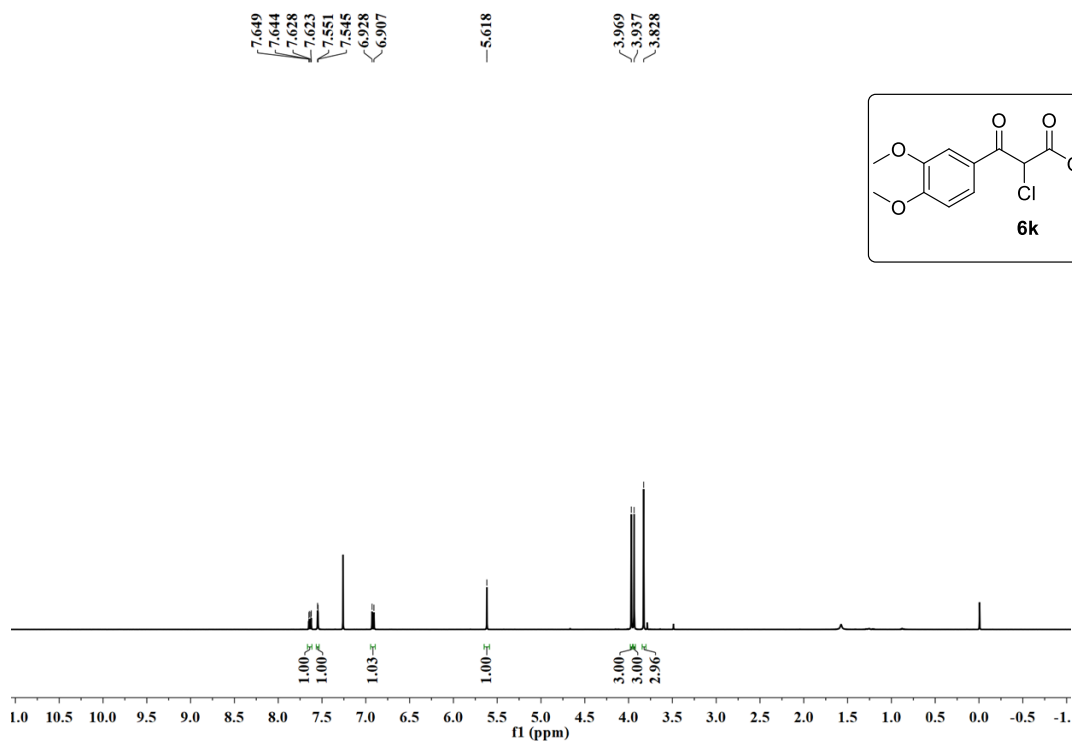

The  $^{13}\text{C}$  NMR (100 MHz,  $\text{CDCl}_3$ ) Spectrum of **6k**

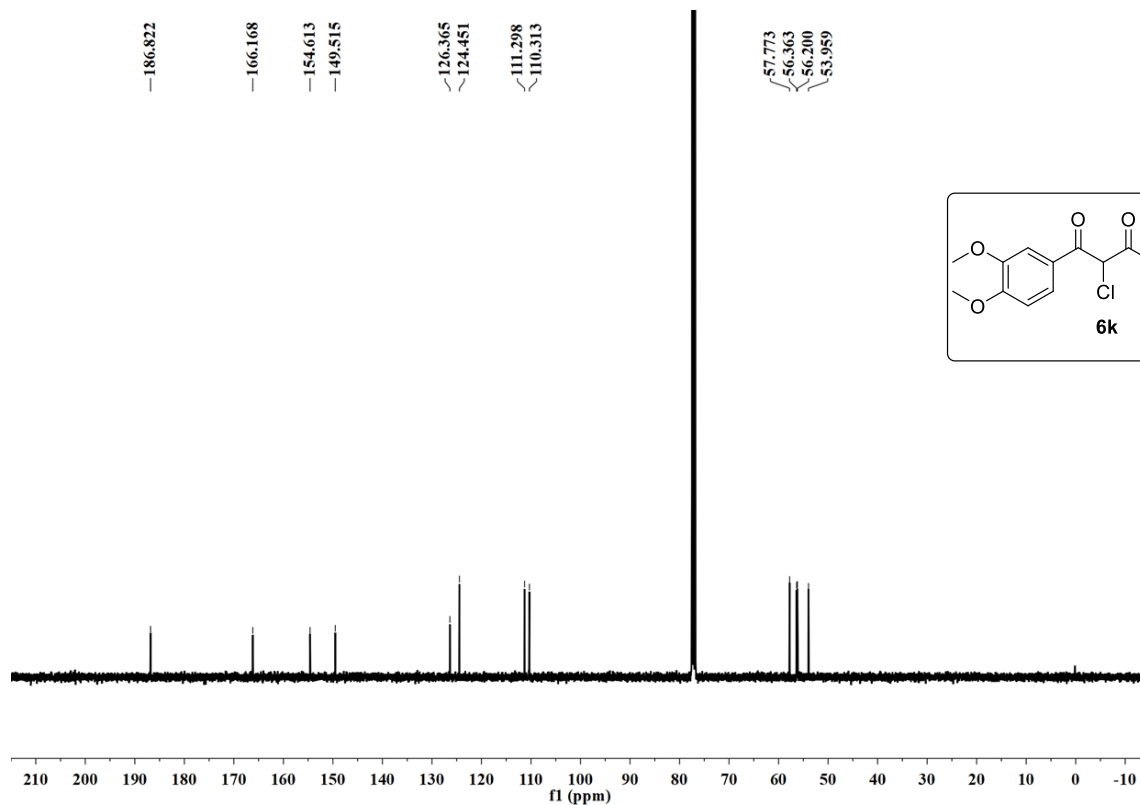

The  $^1\text{H}$  NMR (400 MHz,  $\text{CDCl}_3$ ) Spectrum of **6l**

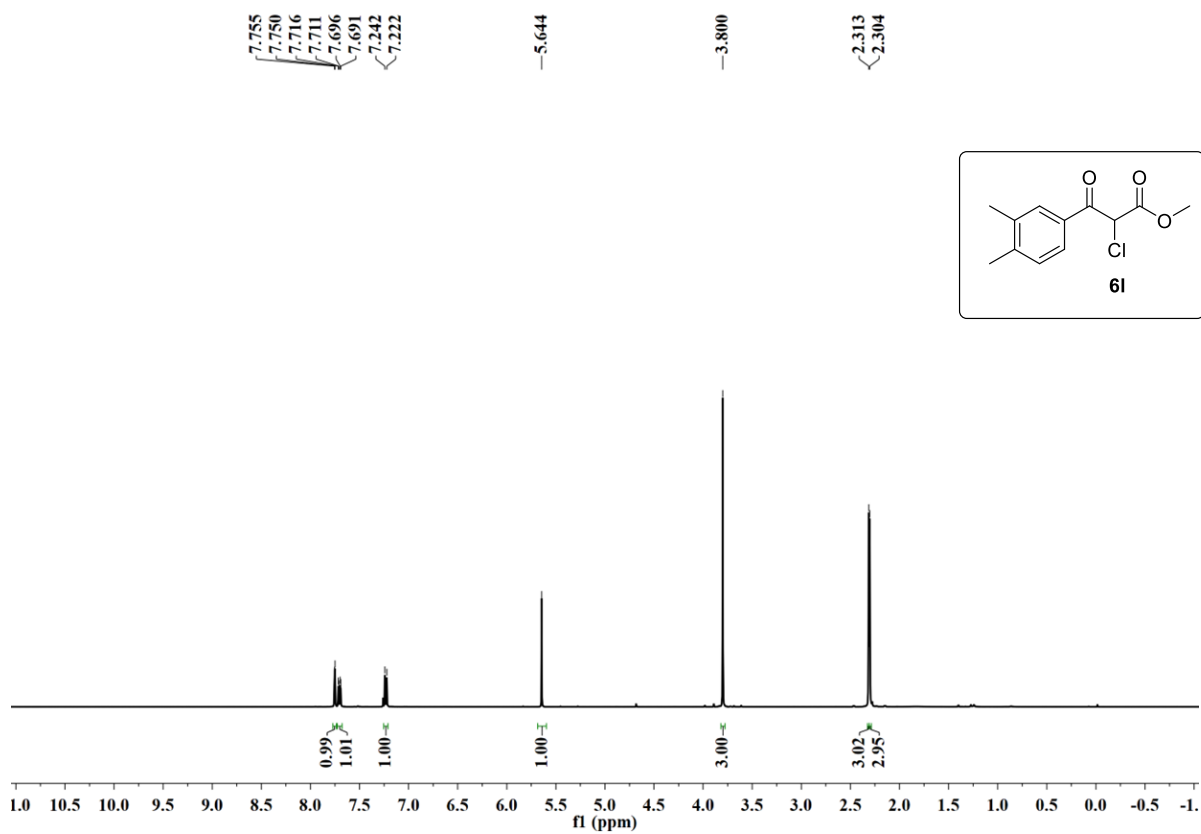

The  $^{13}\text{C}$  NMR (100 MHz,  $\text{CDCl}_3$ ) Spectrum of **6l**

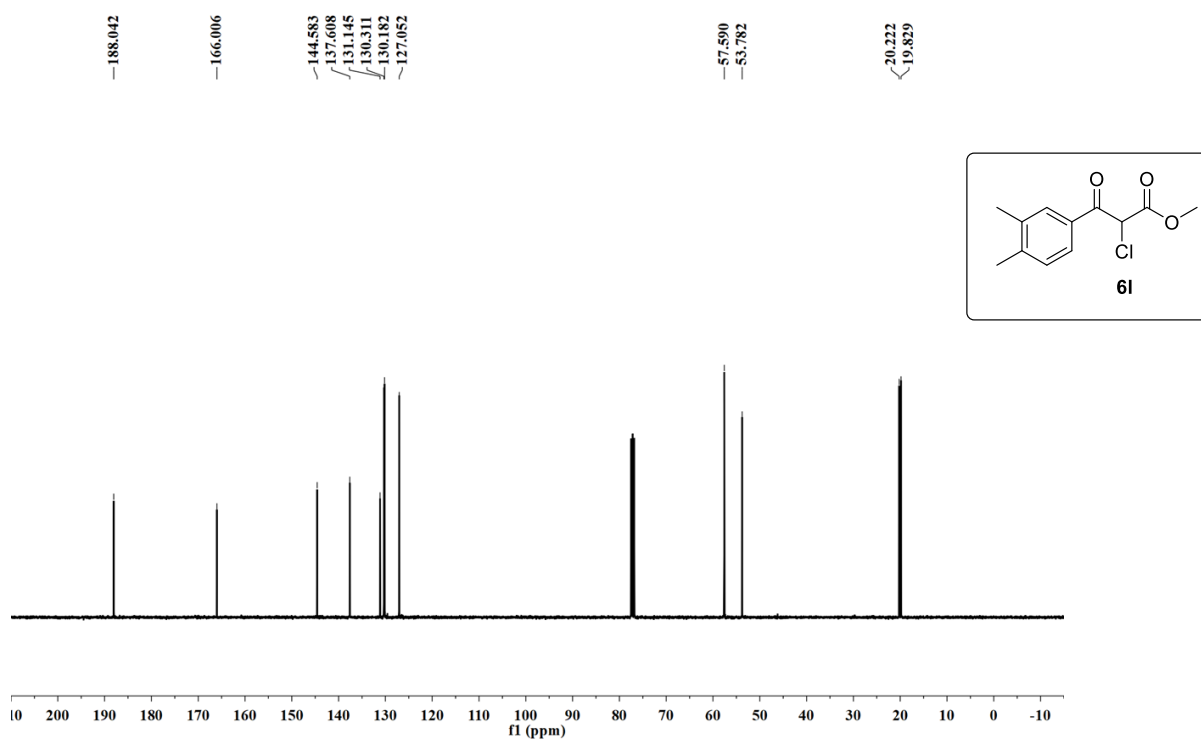

The  $^1\text{H}$  NMR (400 MHz,  $\text{CDCl}_3$ ) Spectrum of **6m**

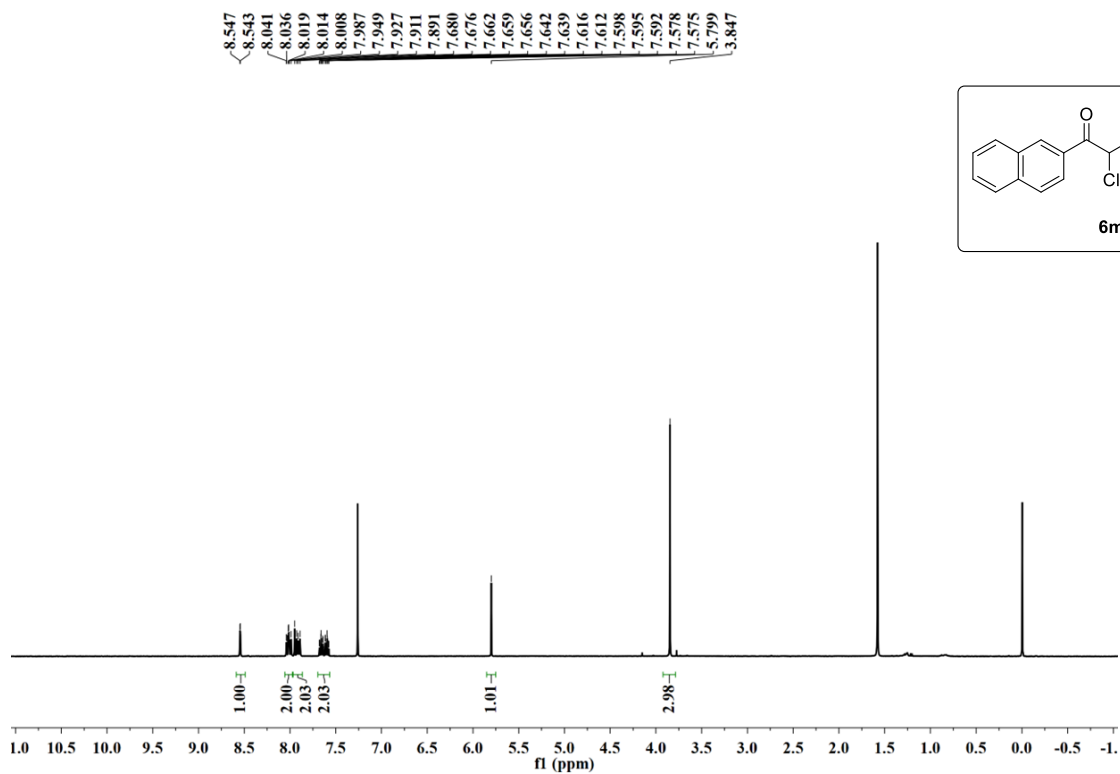

The  $^{13}\text{C}$  NMR (100 MHz,  $\text{CDCl}_3$ ) Spectrum of **6m**

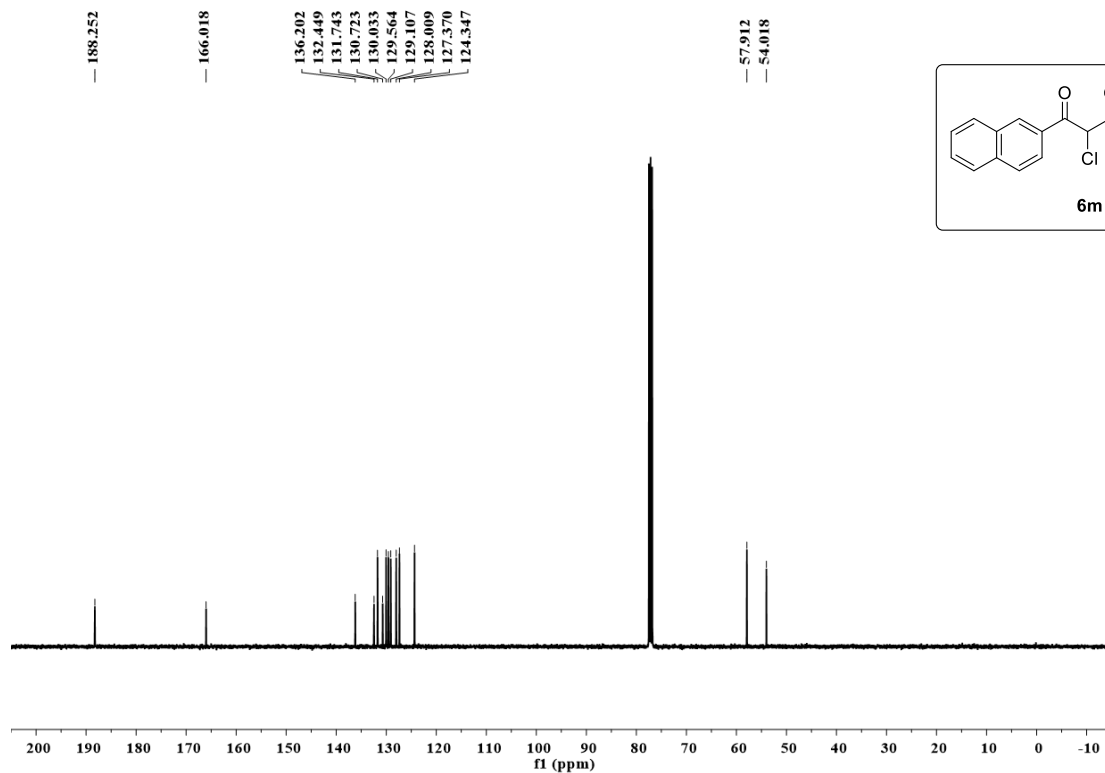

The  $^1\text{H}$  NMR (400 MHz,  $\text{CDCl}_3$ ) Spectrum of **6n**

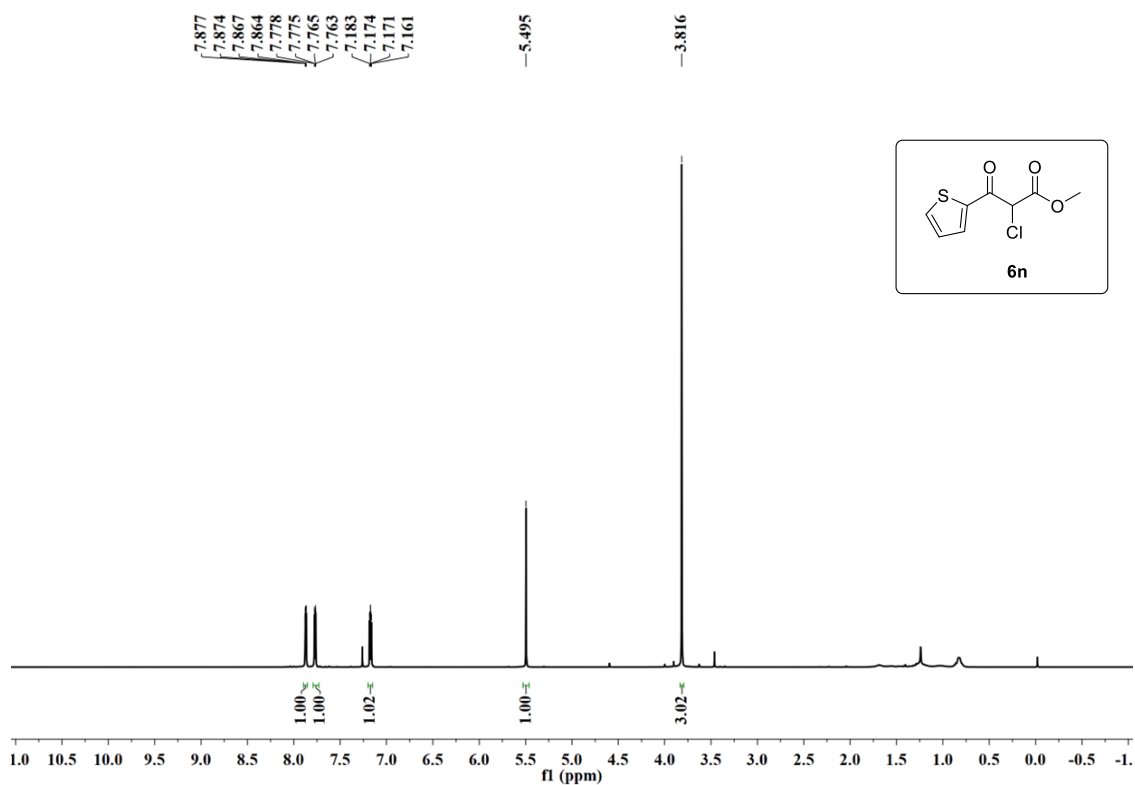

The  $^{13}\text{C}$  NMR (100 MHz,  $\text{CDCl}_3$ ) Spectrum of **6n**

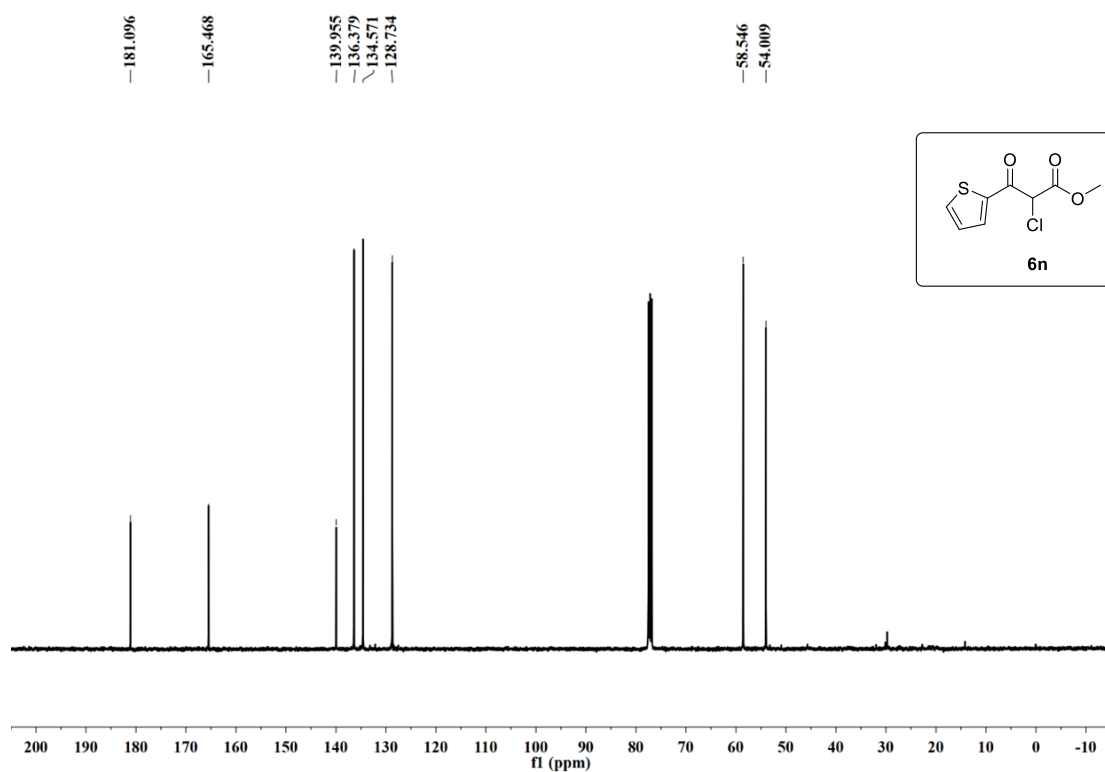

The  $^1\text{H}$  NMR (400 MHz,  $\text{CDCl}_3$ ) Spectrum of **6o**

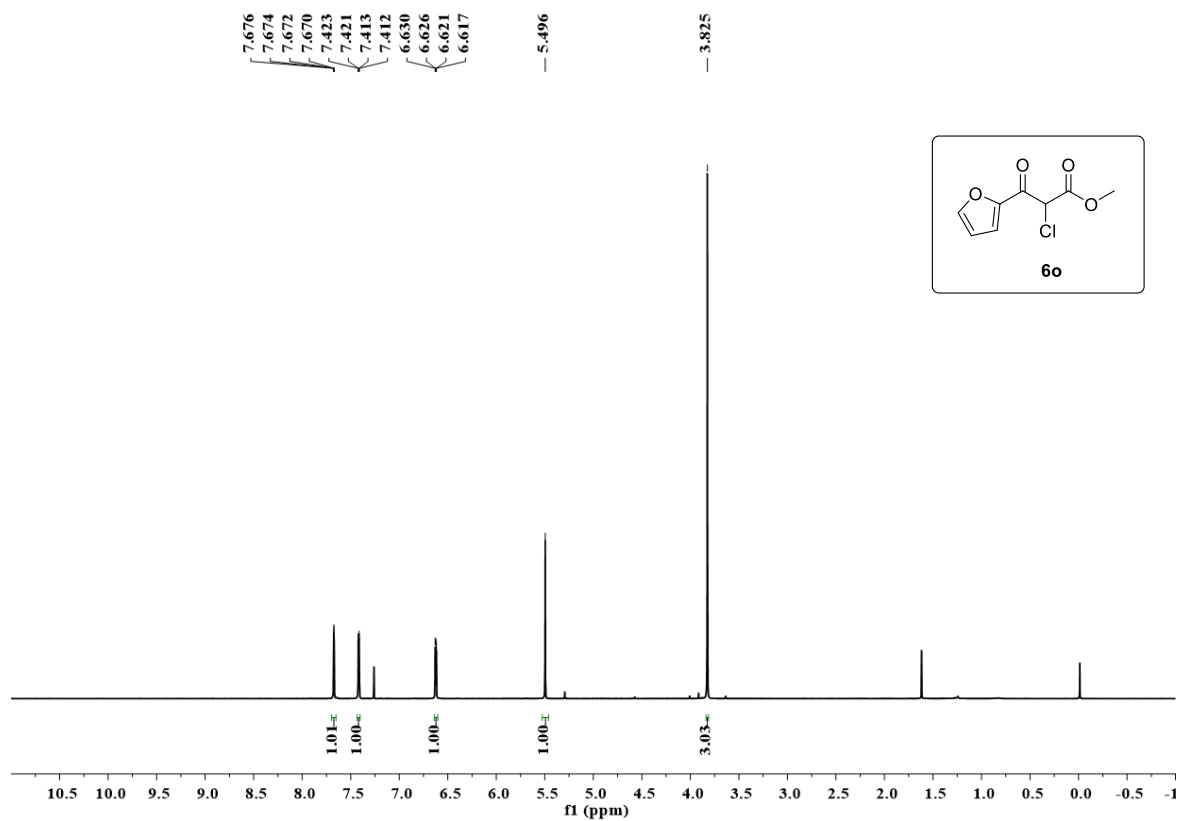

The  $^{13}\text{C}$  NMR (100 MHz,  $\text{CDCl}_3$ ) Spectrum of **6o**

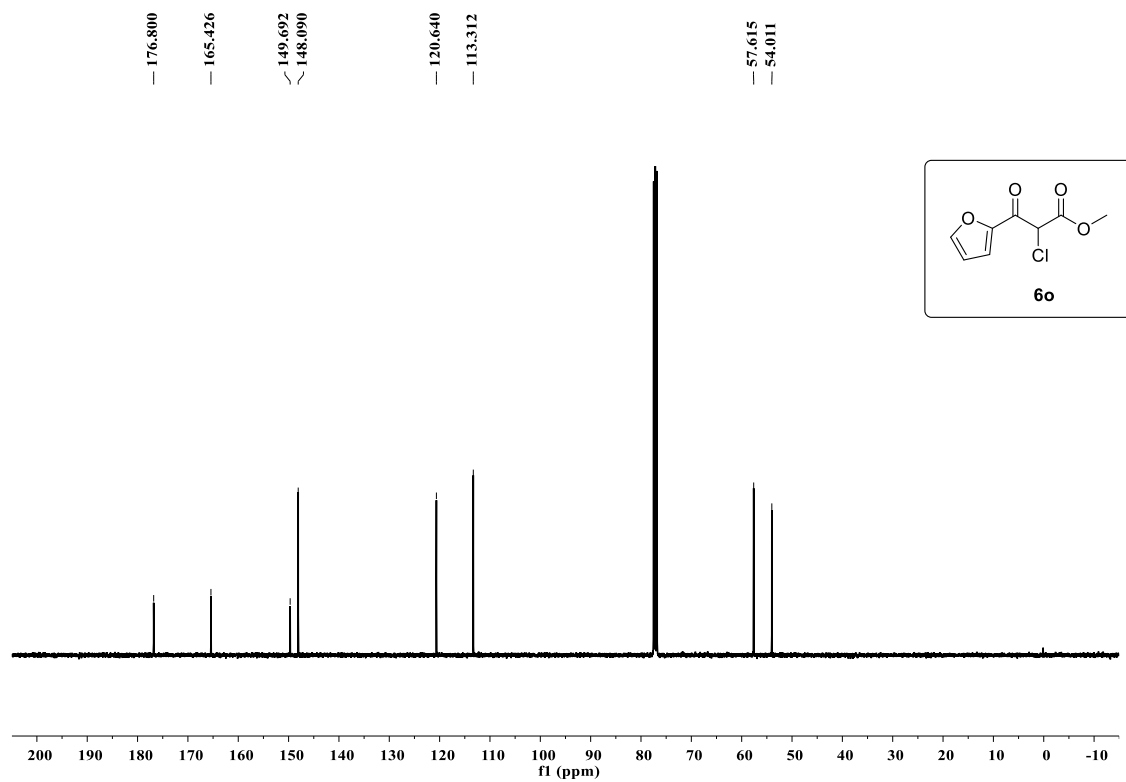

The  $^1\text{H}$  NMR (400 MHz,  $\text{CDCl}_3$ ) Spectrum of **1a**

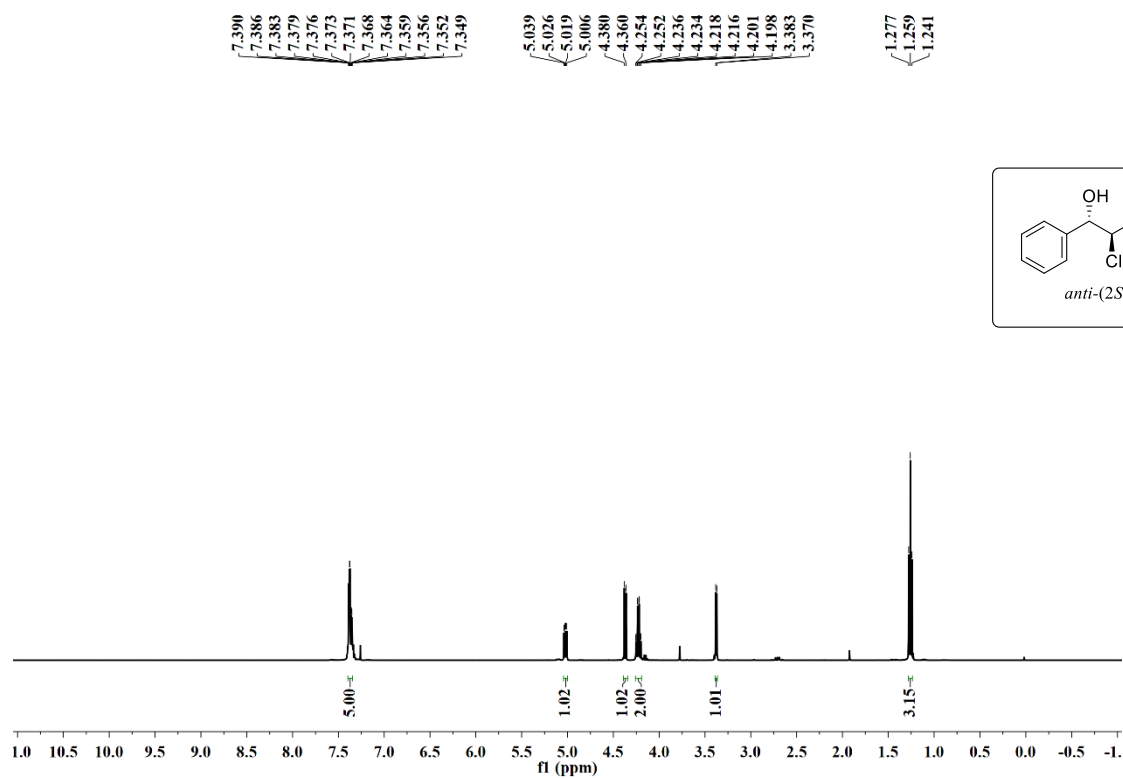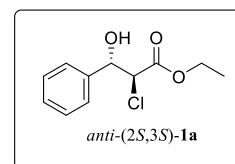

The  $^{13}\text{C}$  NMR (100 MHz,  $\text{CDCl}_3$ ) Spectrum of **1a**

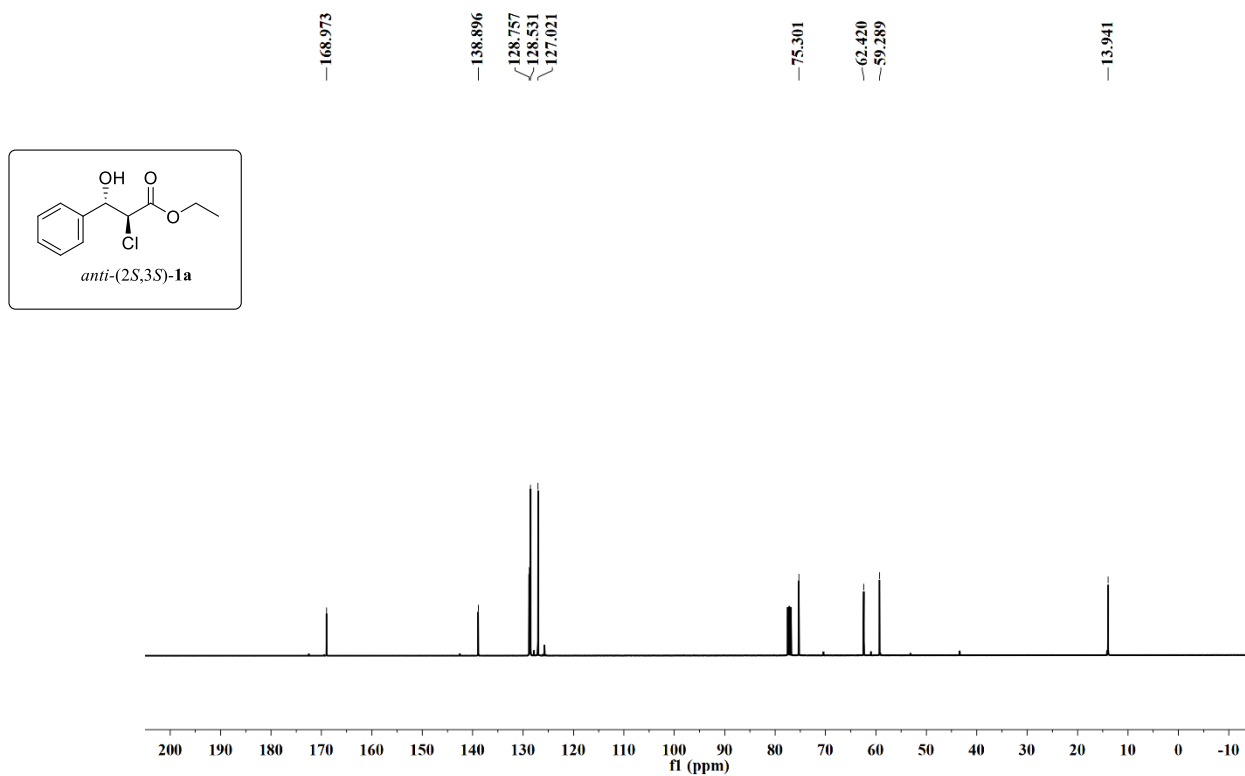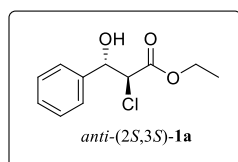

The  $^1\text{H}$  NMR (400 MHz,  $\text{CDCl}_3$ ) Spectrum of **1b**

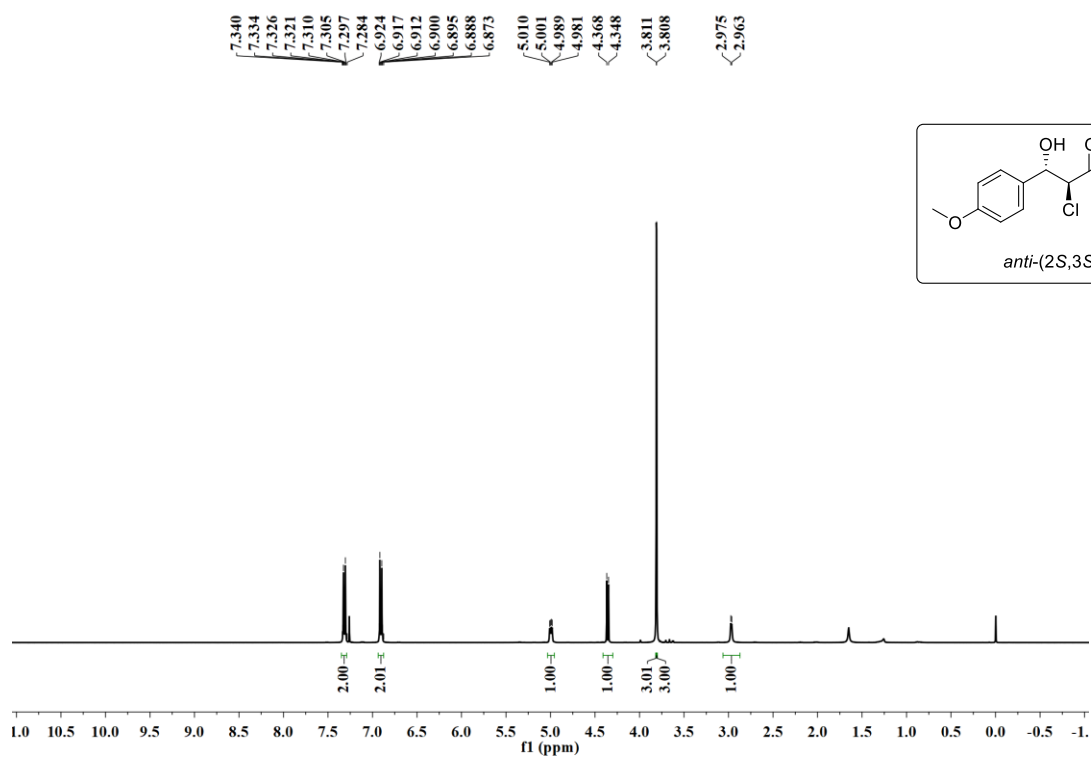

The  $^{13}\text{C}$  NMR (100 MHz,  $\text{CDCl}_3$ ) Spectrum of **1b**

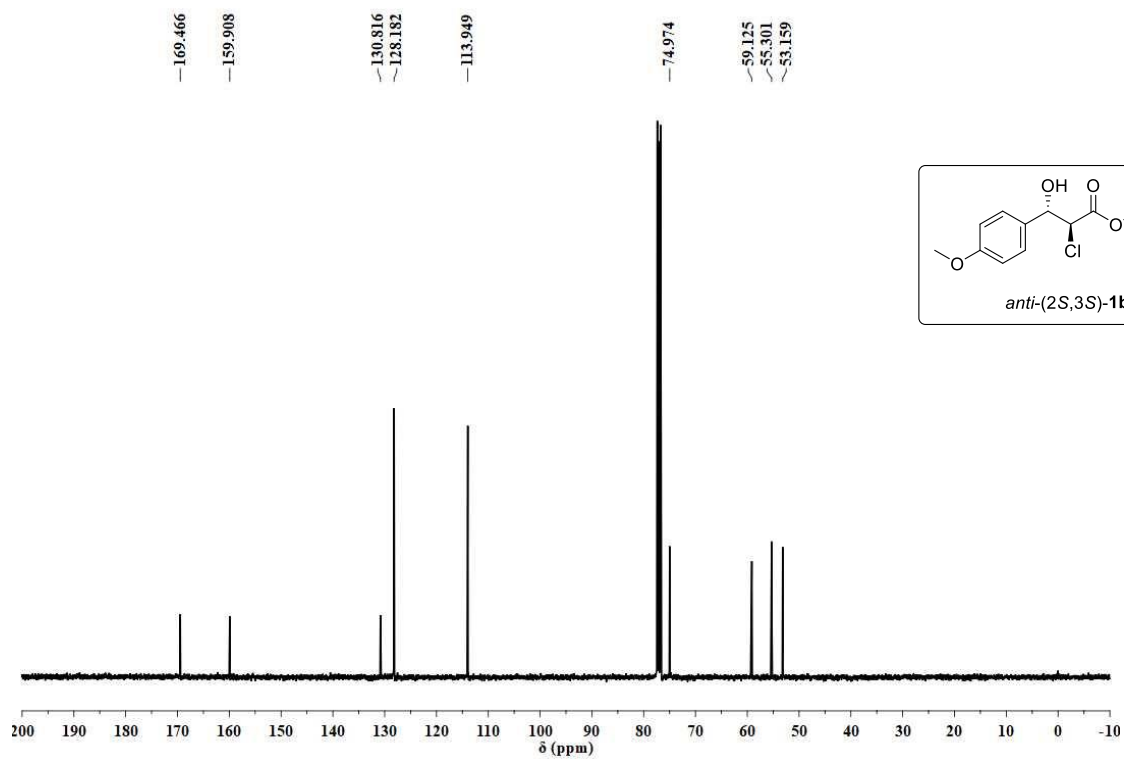

The  $^1\text{H}$  NMR (400 MHz,  $\text{CDCl}_3$ ) Spectrum of **1c**

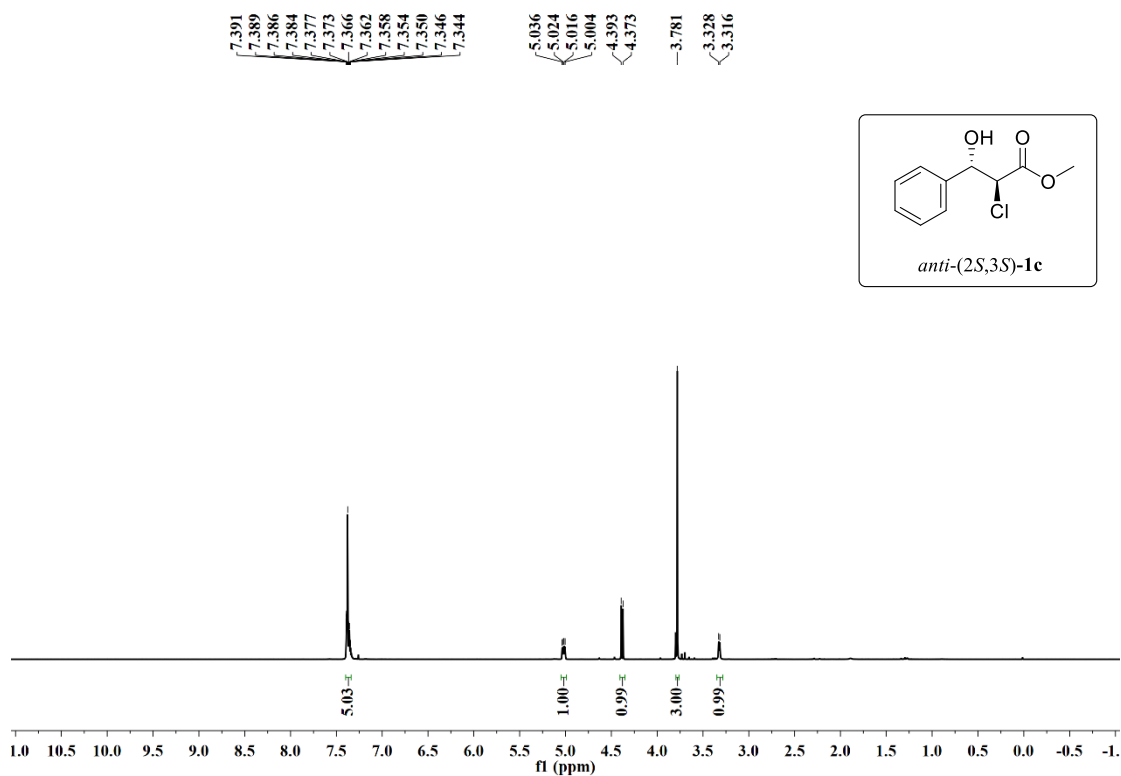

The  $^{13}\text{C}$  NMR (100 MHz,  $\text{CDCl}_3$ ) Spectrum of **1c**

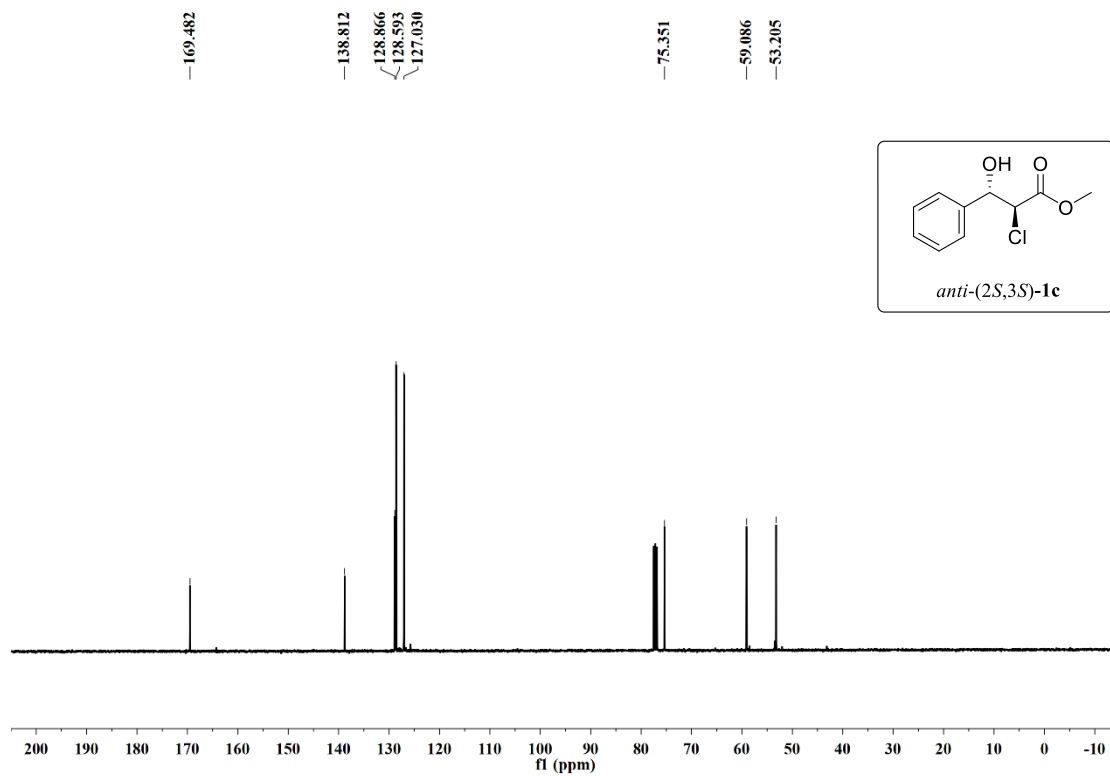



The  $^1\text{H}$  NMR (400 MHz,  $\text{CDCl}_3$ ) Spectrum of **1d**

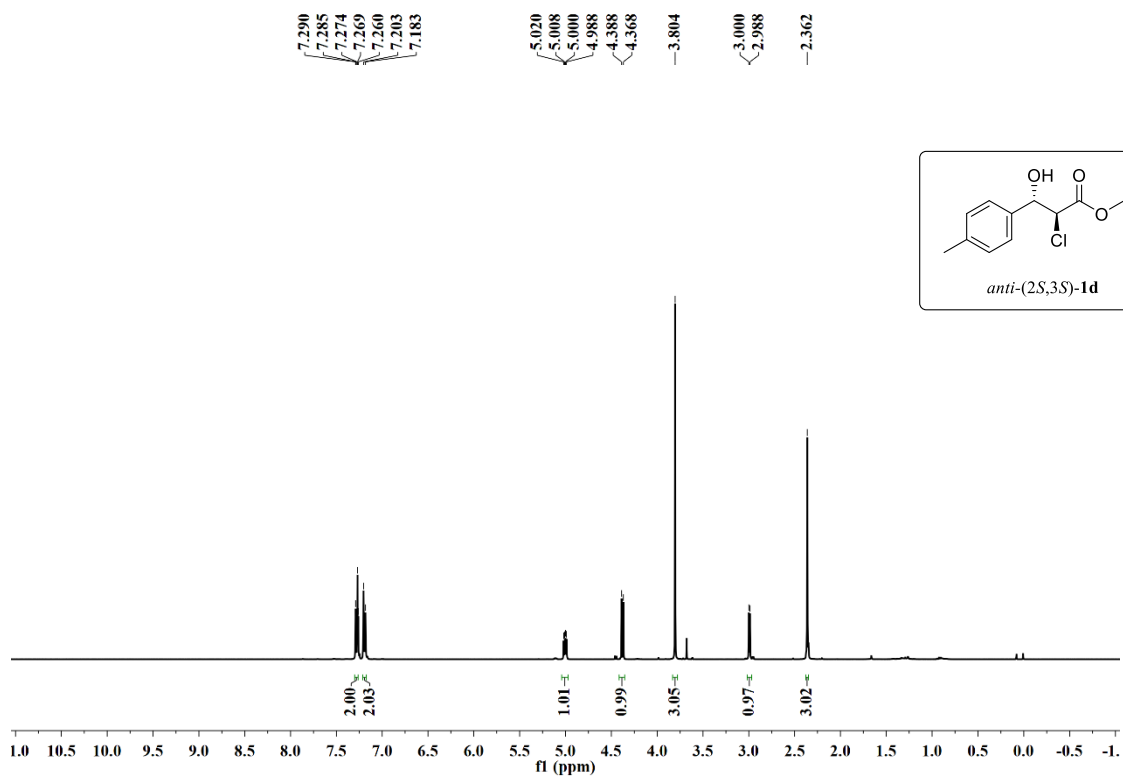

The  $^{13}\text{C}$  NMR (100 MHz,  $\text{CDCl}_3$ ) Spectrum of **1d**

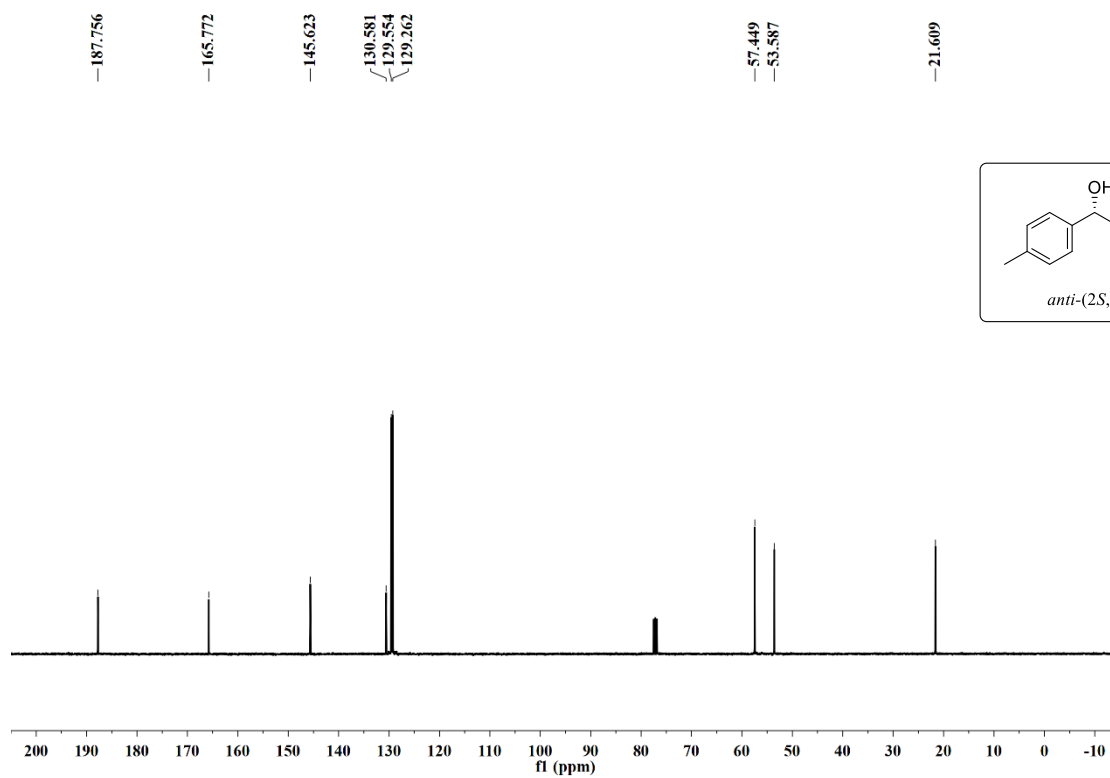

The  $^1\text{H}$  NMR (400 MHz,  $\text{CDCl}_3$ ) Spectrum of **1e**

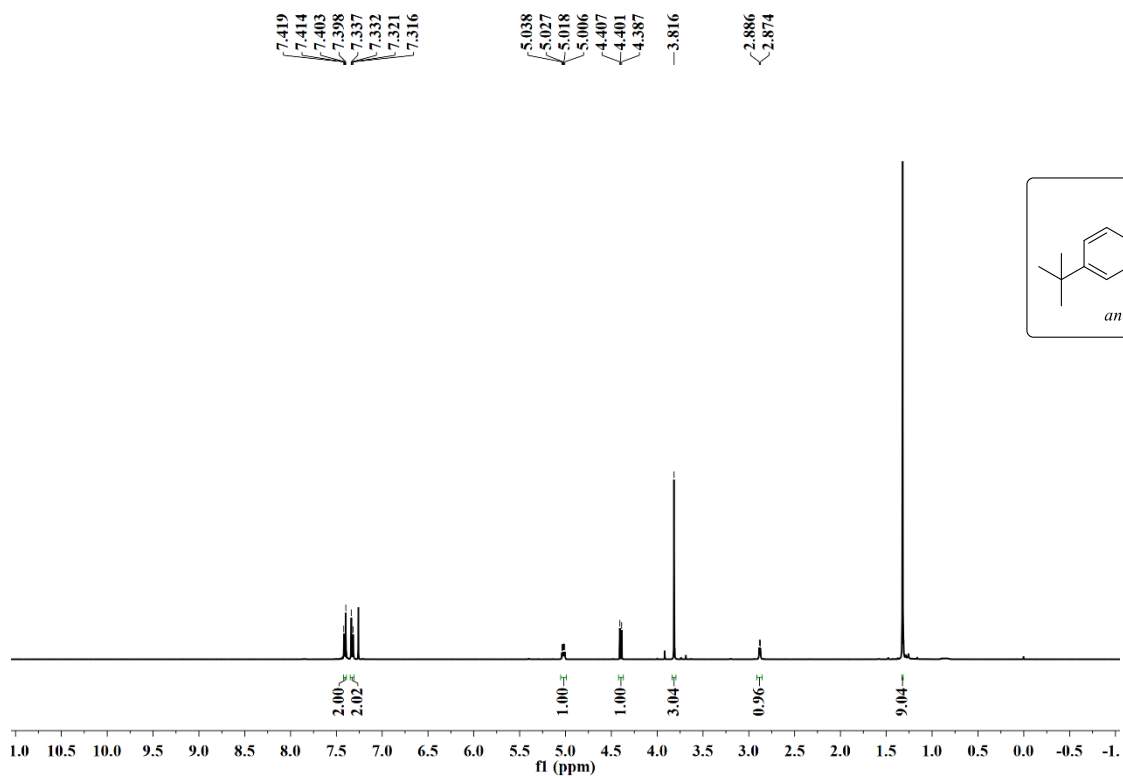

The  $^{13}\text{C}$  NMR (100 MHz,  $\text{CDCl}_3$ ) Spectrum of **1e**

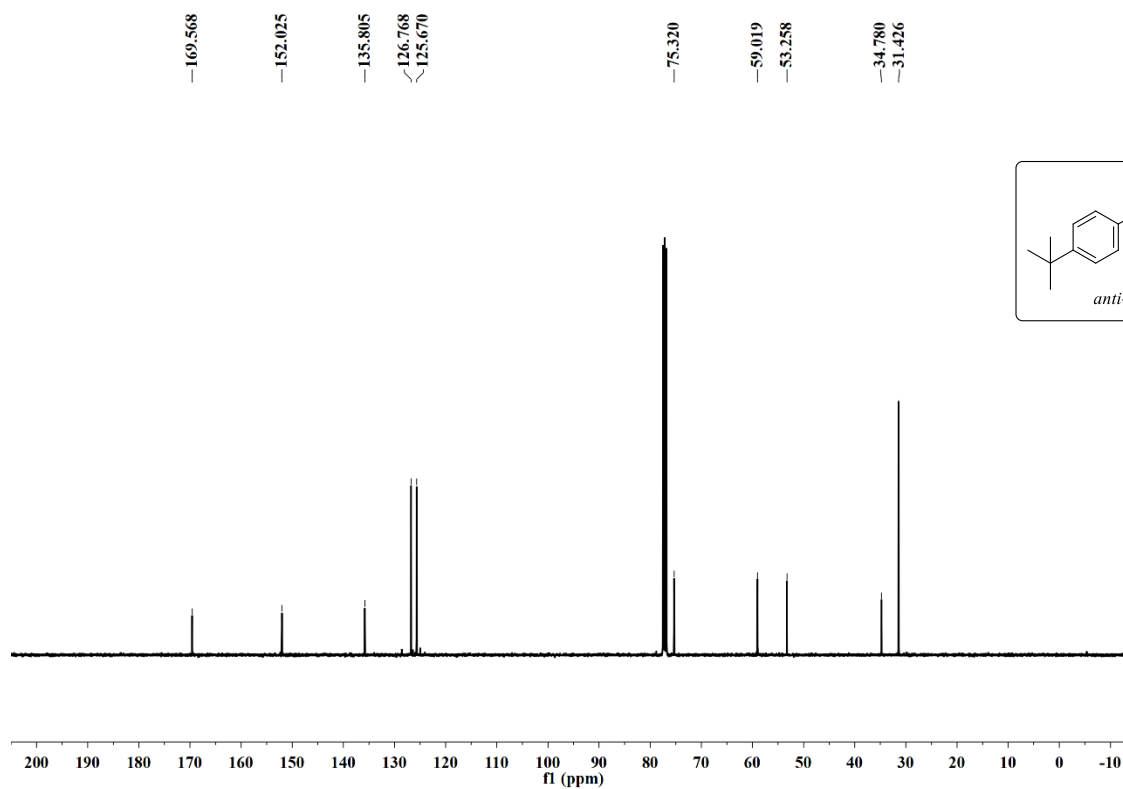

The  $^1\text{H}$  NMR (400 MHz,  $\text{CDCl}_3$ ) Spectrum of **1f**

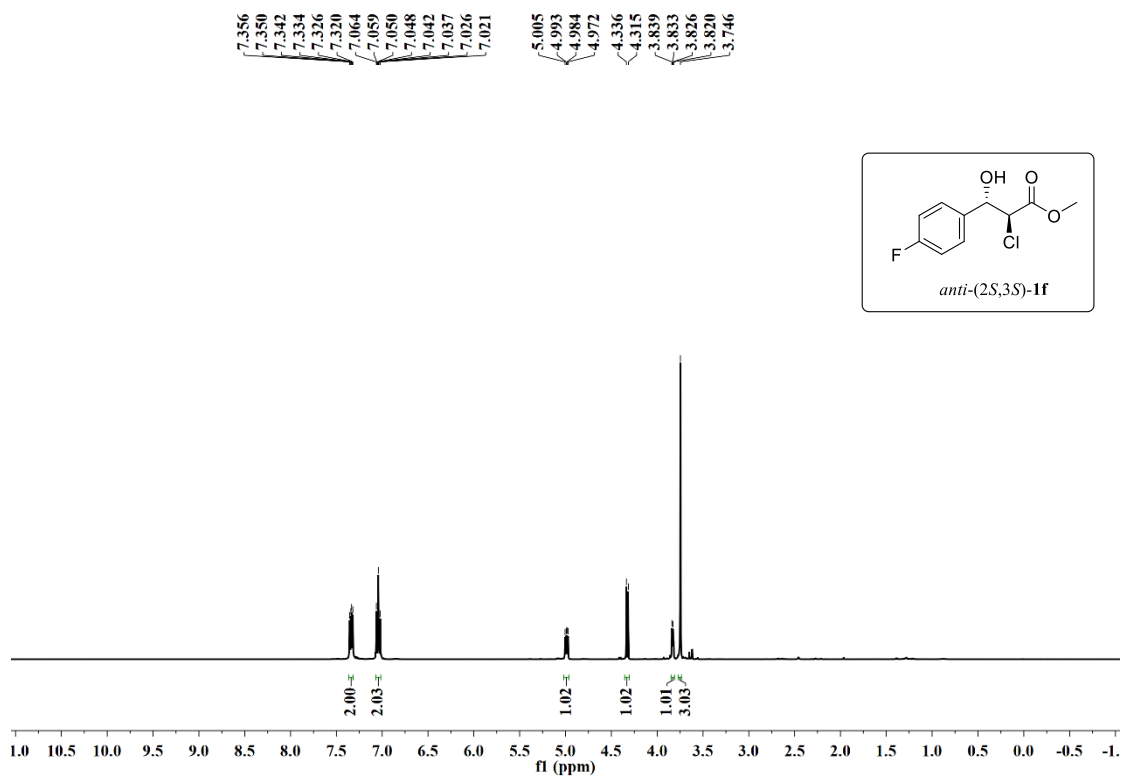

The  $^{13}\text{C}$  NMR (100 MHz,  $\text{CDCl}_3$ ) Spectrum of **1f**

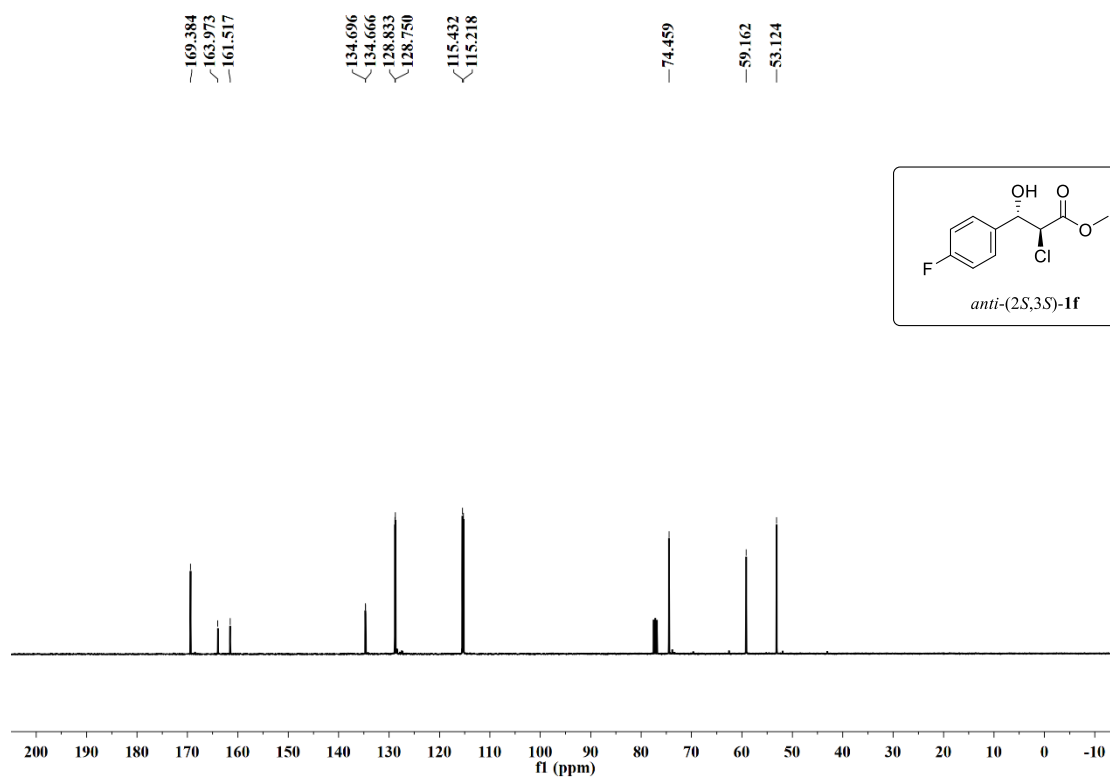

The  $^1\text{H}$  NMR (400 MHz,  $\text{CDCl}_3$ ) Spectrum of **1g**

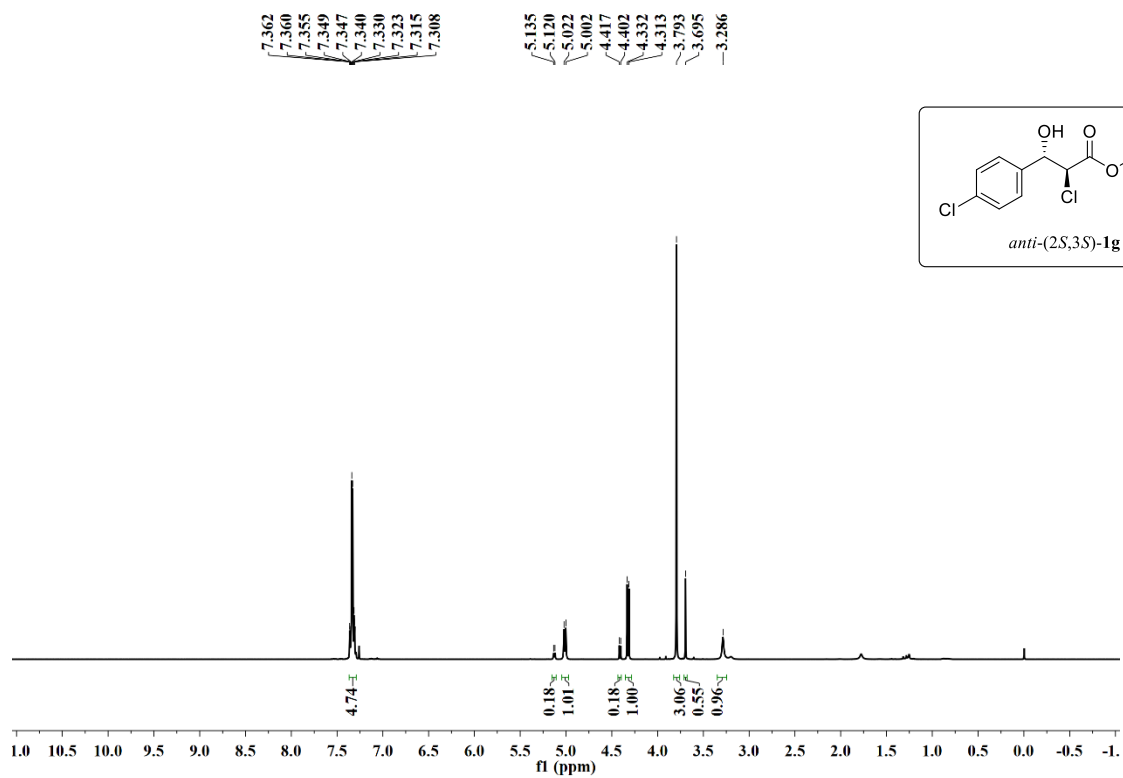

The  $^{13}\text{C}$  NMR (100 MHz,  $\text{CDCl}_3$ ) Spectrum of **1g**

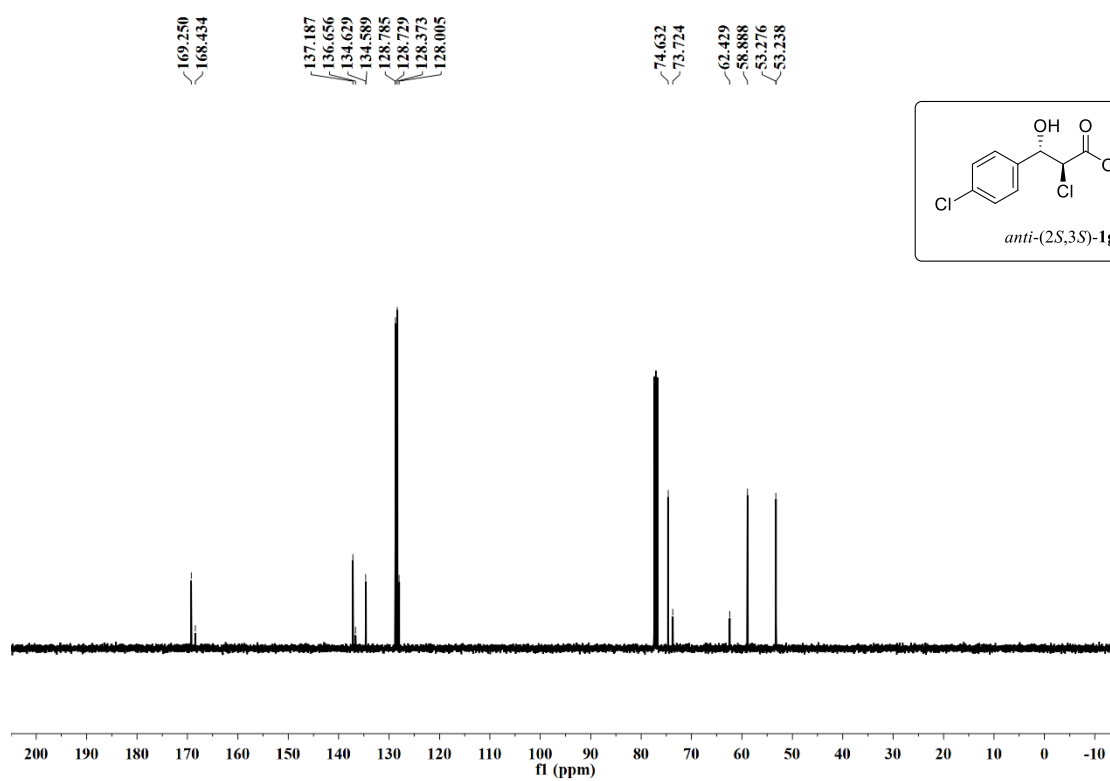

The  $^1\text{H}$  NMR (400 MHz,  $\text{CDCl}_3$ ) Spectrum of **1h**

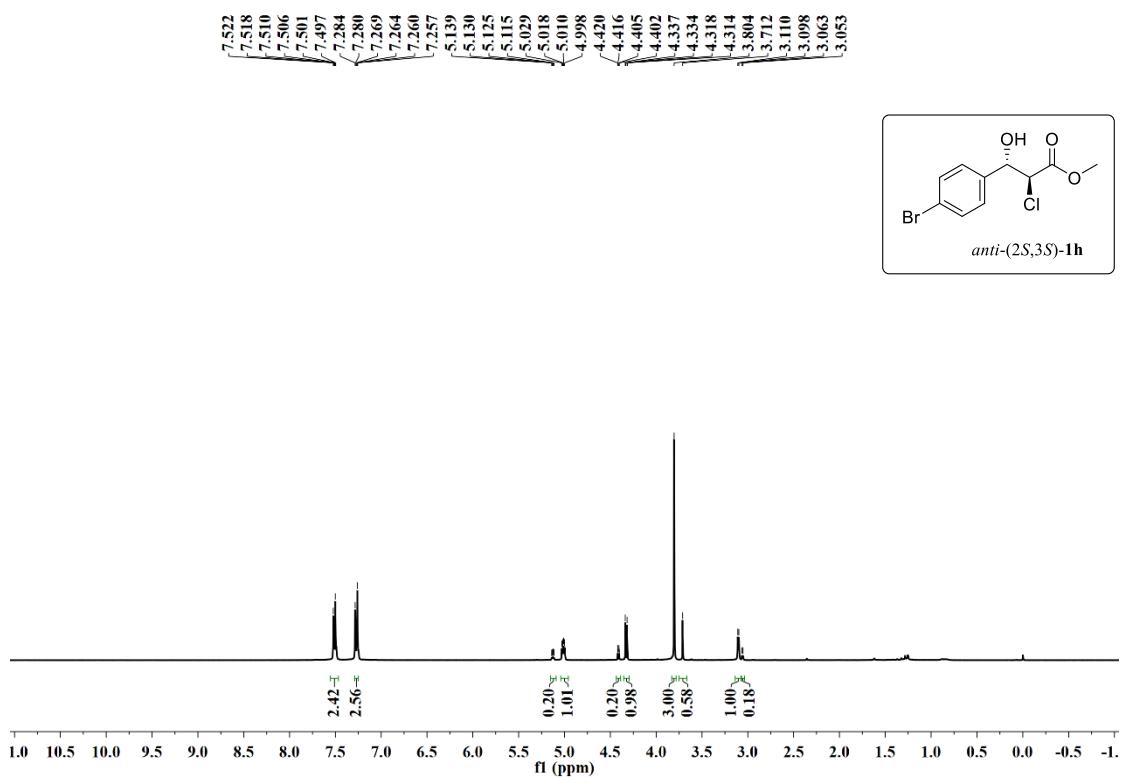

The  $^{13}\text{C}$  NMR (100 MHz,  $\text{CDCl}_3$ ) Spectrum of **1h**

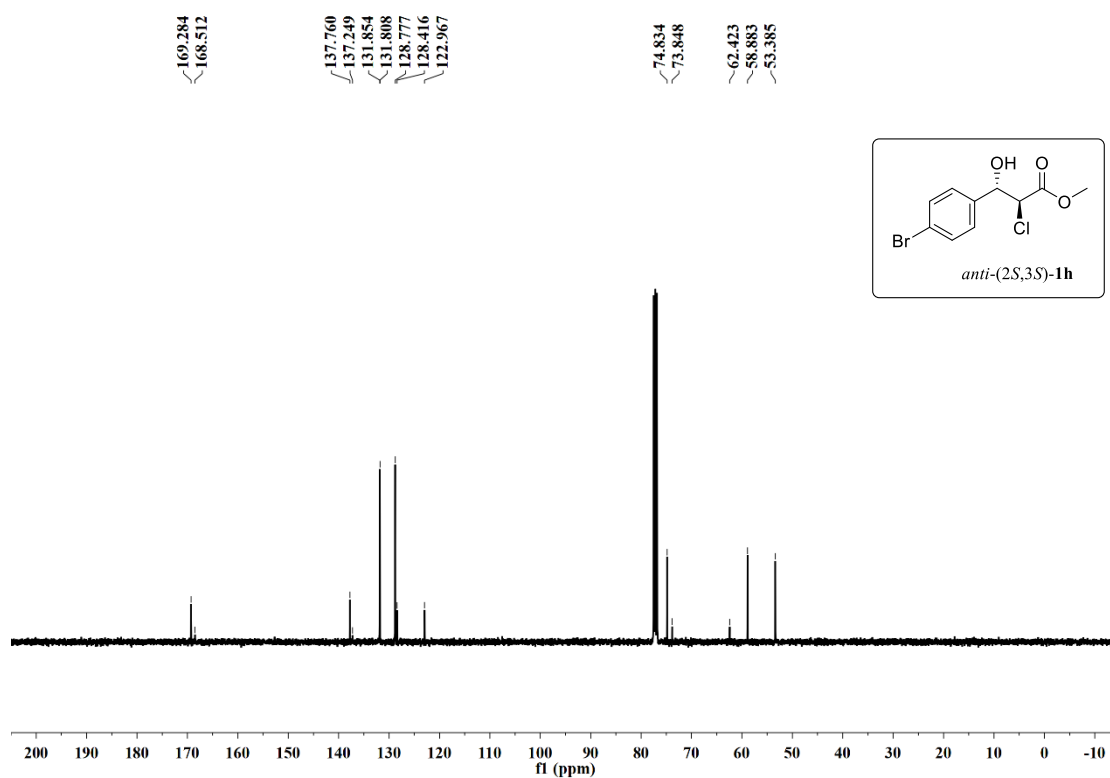

The  $^1\text{H}$  NMR (400 MHz,  $\text{CDCl}_3$ ) Spectrum of **1i**

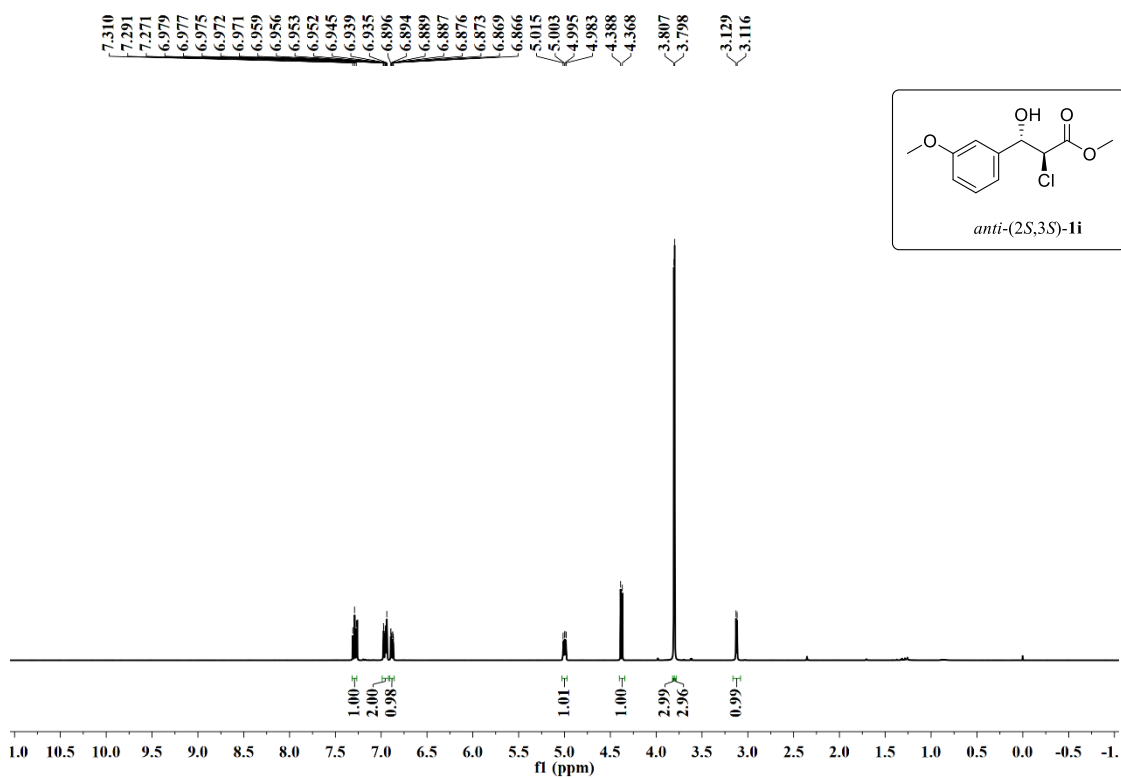

The  $^{13}\text{C}$  NMR (100 MHz,  $\text{CDCl}_3$ ) Spectrum of **1i**

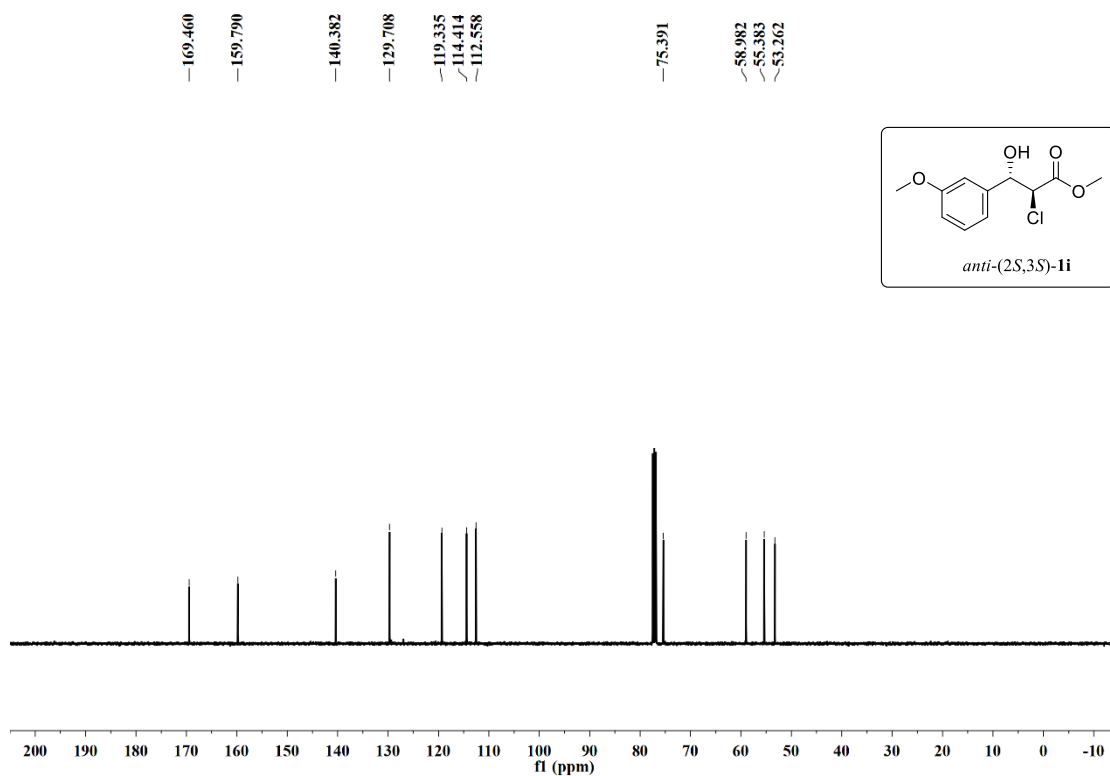

The  $^1\text{H}$  NMR (400 MHz,  $\text{CDCl}_3$ ) Spectrum of **1j**

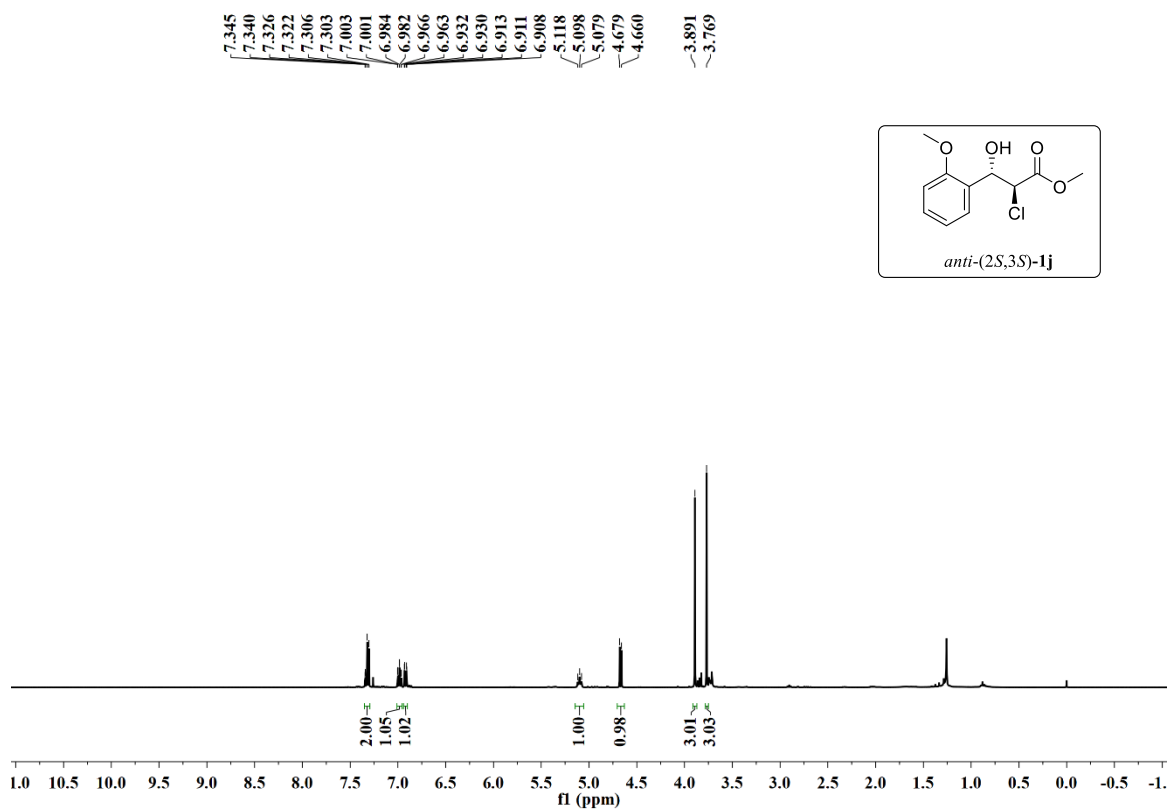

The  $^{13}\text{C}$  NMR (100 MHz,  $\text{CDCl}_3$ ) Spectrum of **1j**

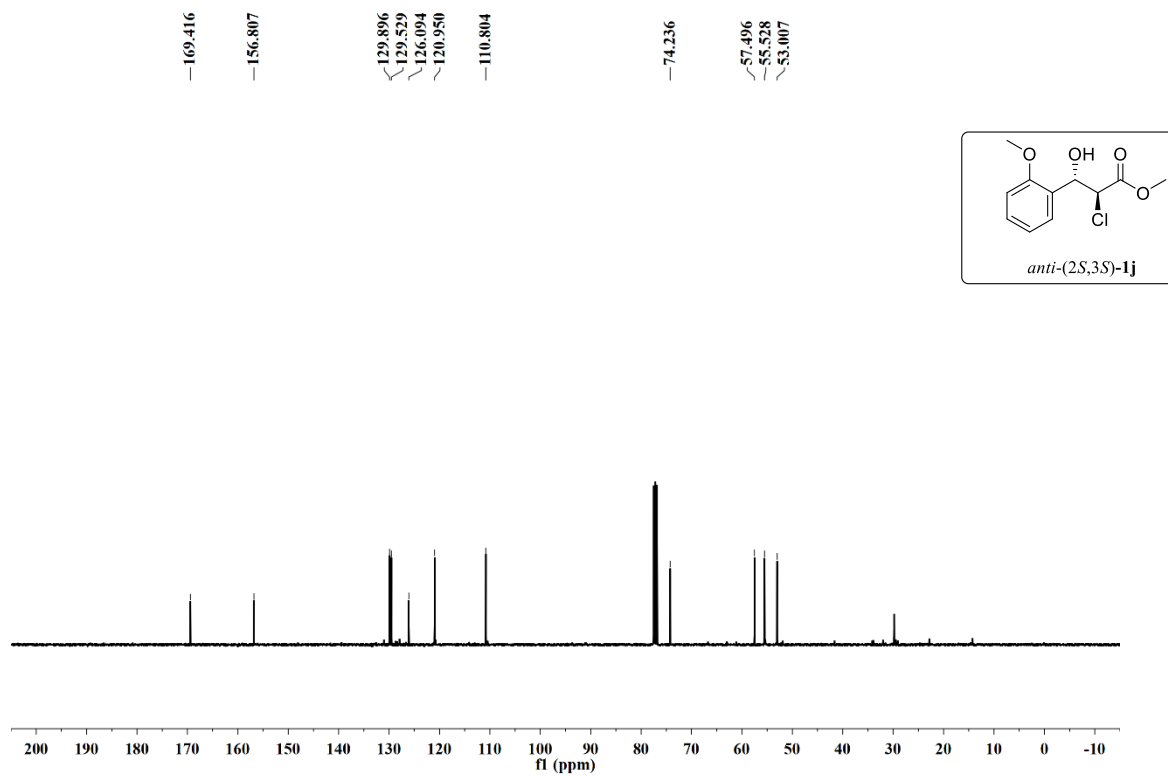

The  $^1\text{H}$  NMR (400 MHz,  $\text{CDCl}_3$ ) Spectrum of **1k**

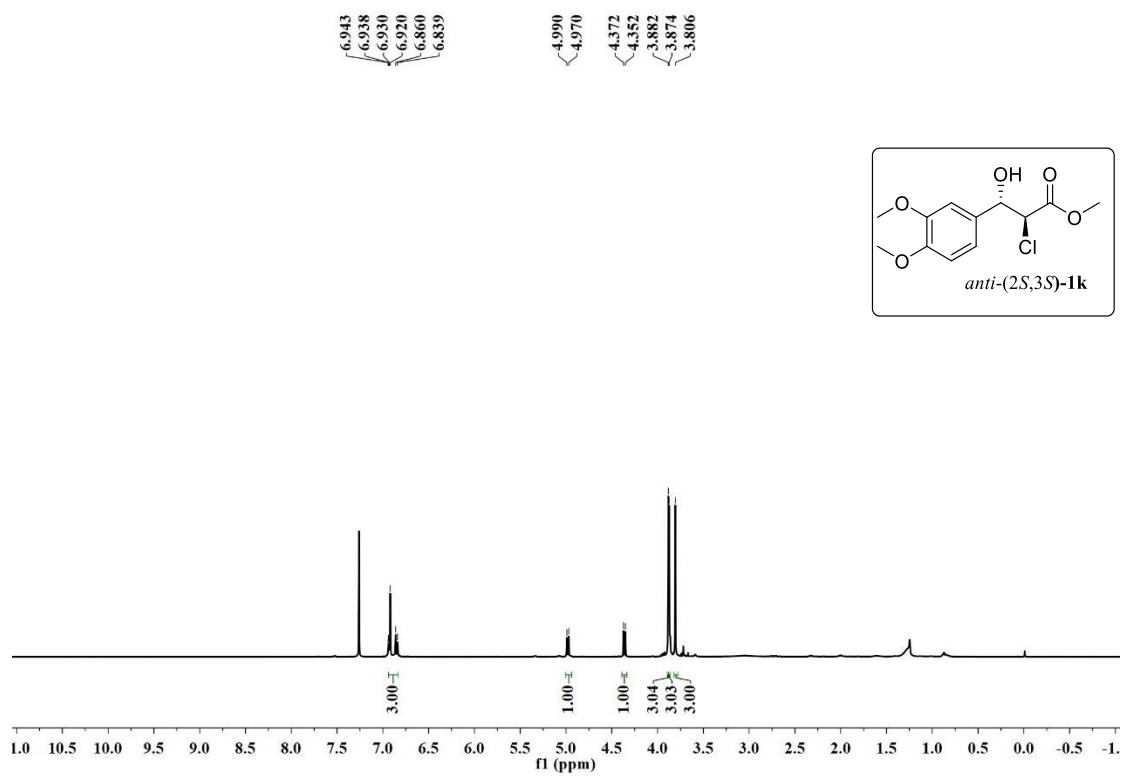

The  $^{13}\text{C}$  NMR (100 MHz,  $\text{CDCl}_3$ ) Spectrum of **1k**

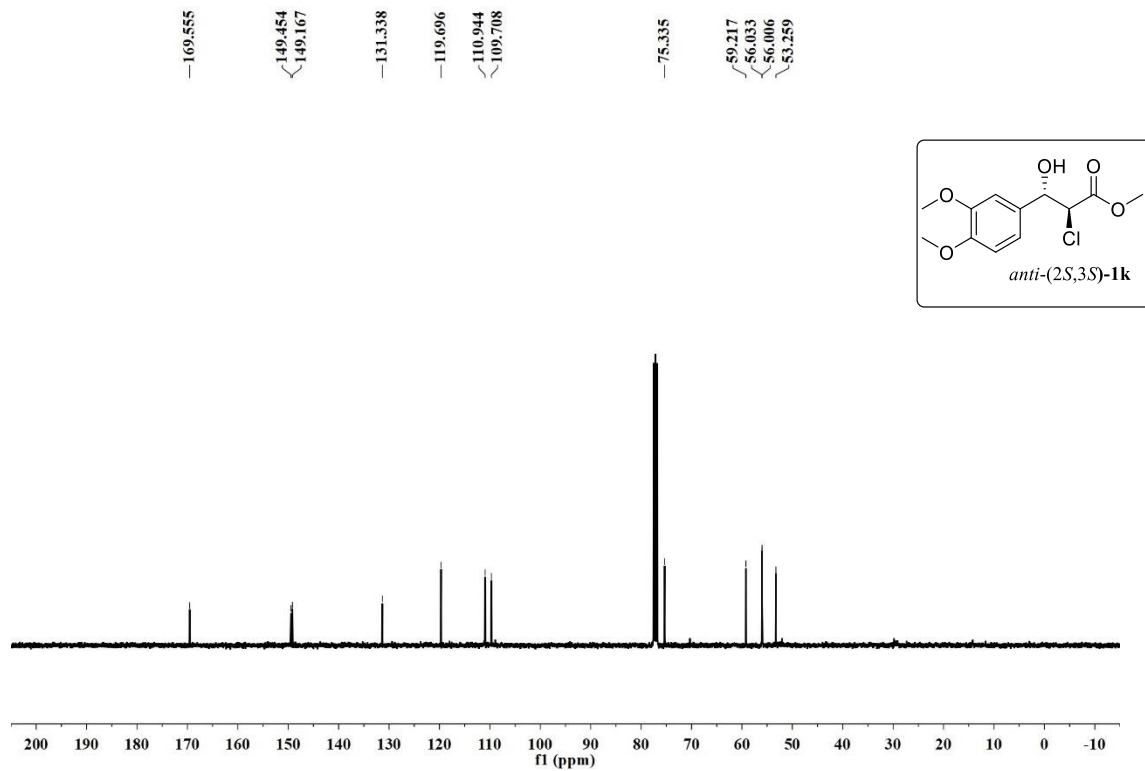



The  $^1\text{H}$  NMR (400 MHz,  $\text{CDCl}_3$ ) Spectrum of **11**

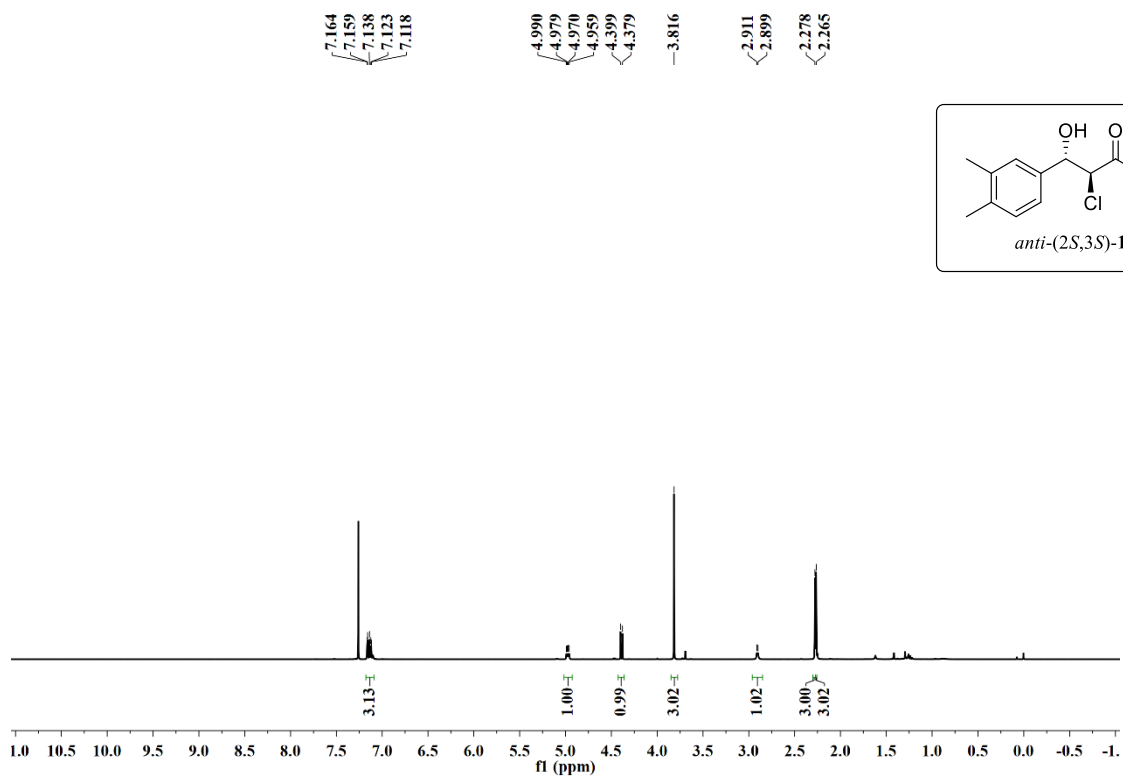

The  $^{13}\text{C}$  NMR (100 MHz,  $\text{CDCl}_3$ ) Spectrum of **11**

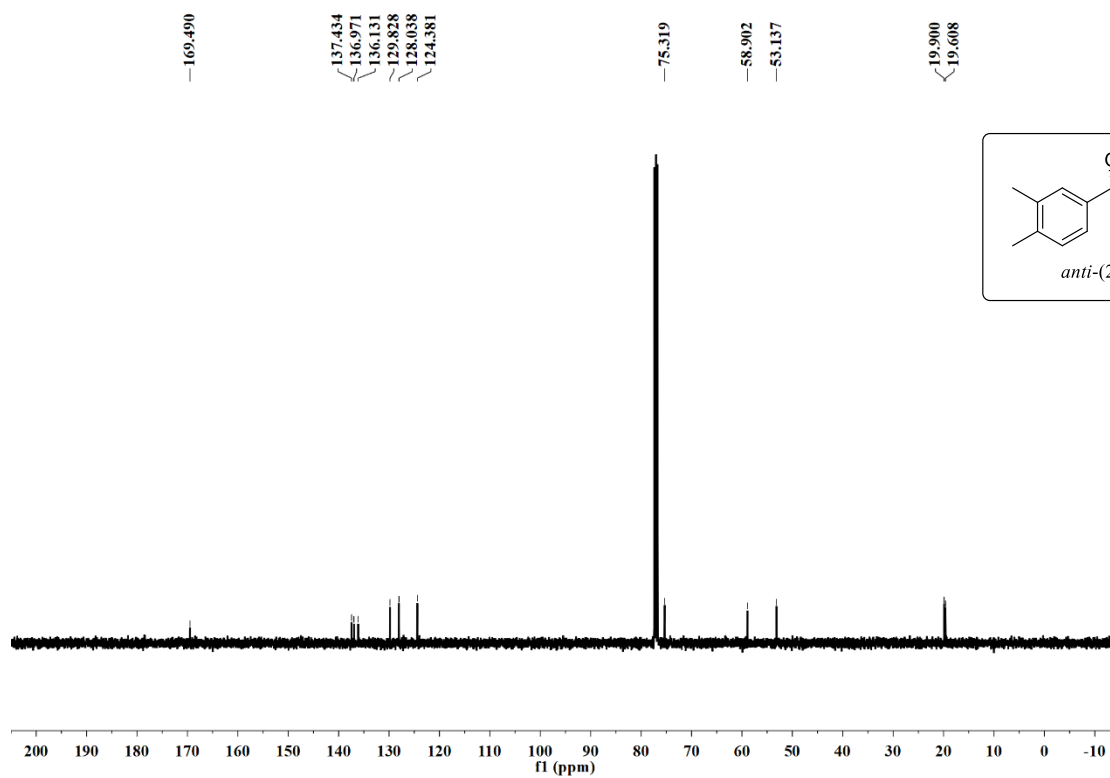

The  $^1\text{H}$  NMR (400 MHz,  $\text{CDCl}_3$ ) Spectrum of **1m**

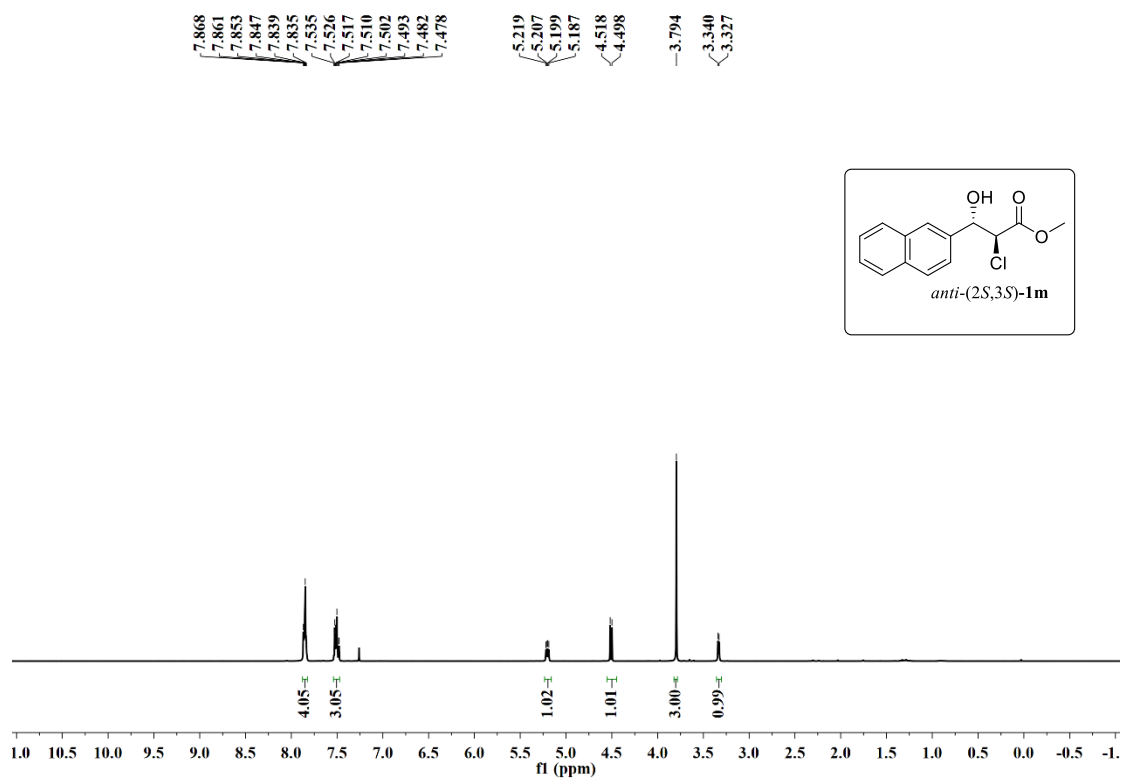

The  $^{13}\text{C}$  NMR (100 MHz,  $\text{CDCl}_3$ ) Spectrum of **1m**

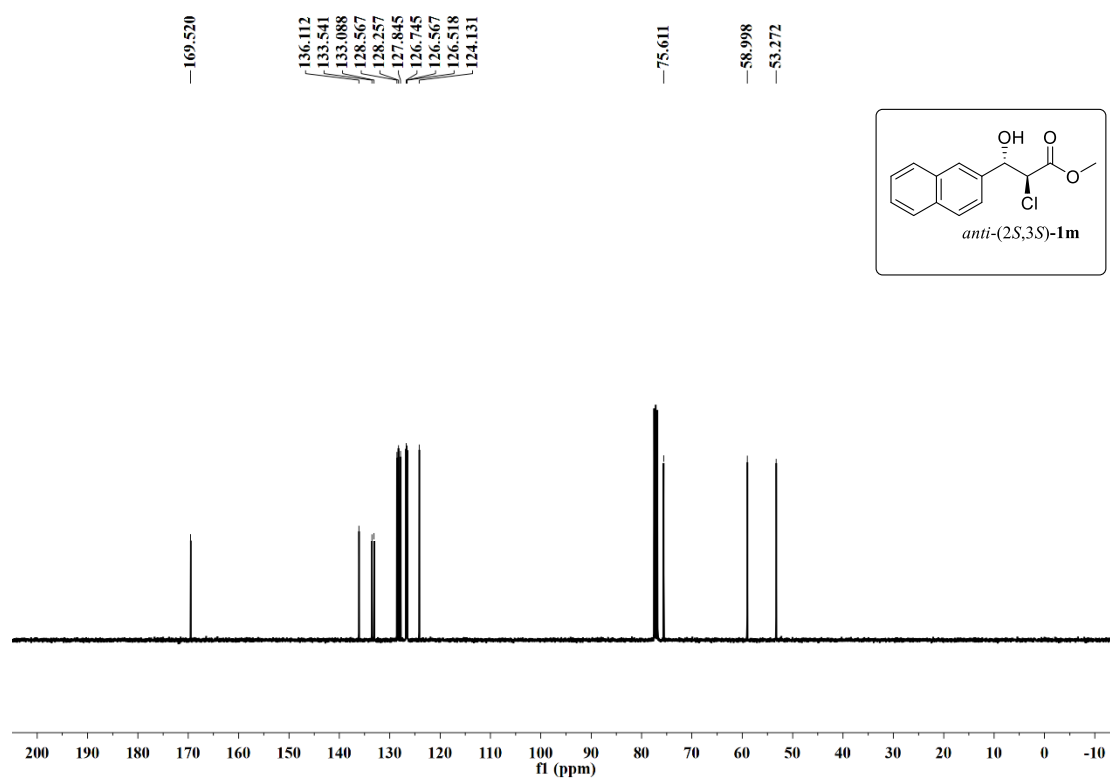

The  $^1\text{H}$  NMR (400 MHz,  $\text{CDCl}_3$ ) Spectrum of **1n**

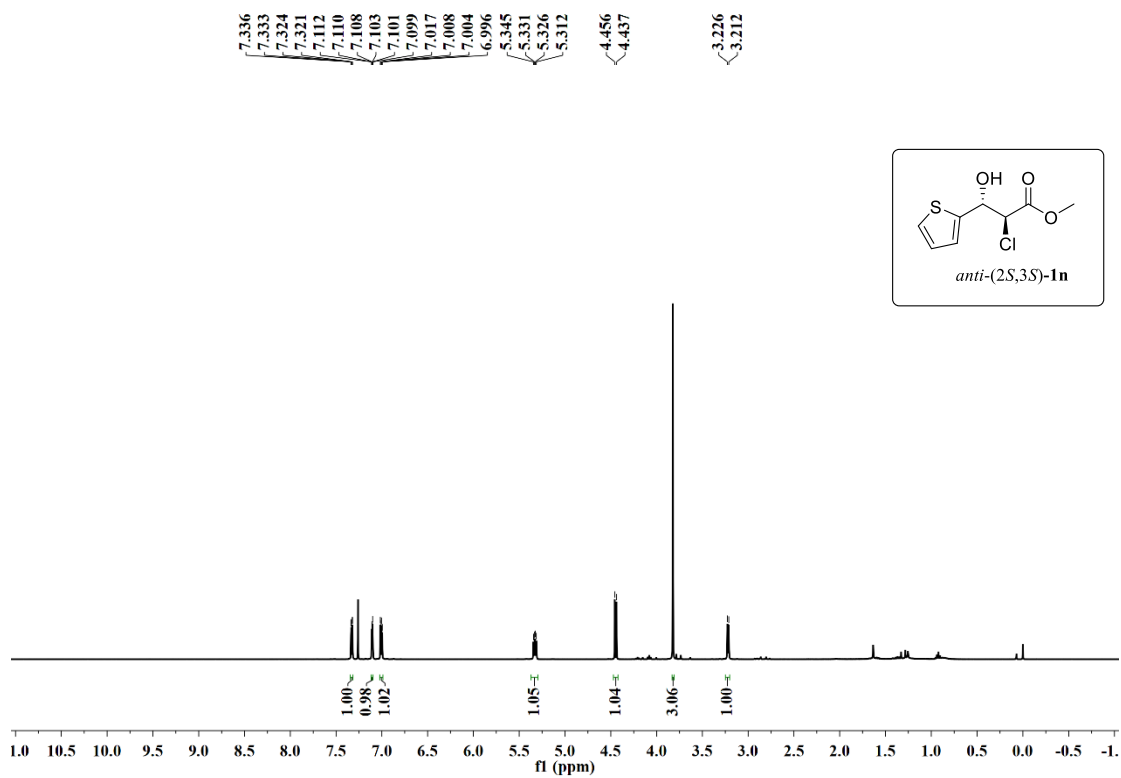

The  $^{13}\text{C}$  NMR (100 MHz,  $\text{CDCl}_3$ ) Spectrum of **1n**

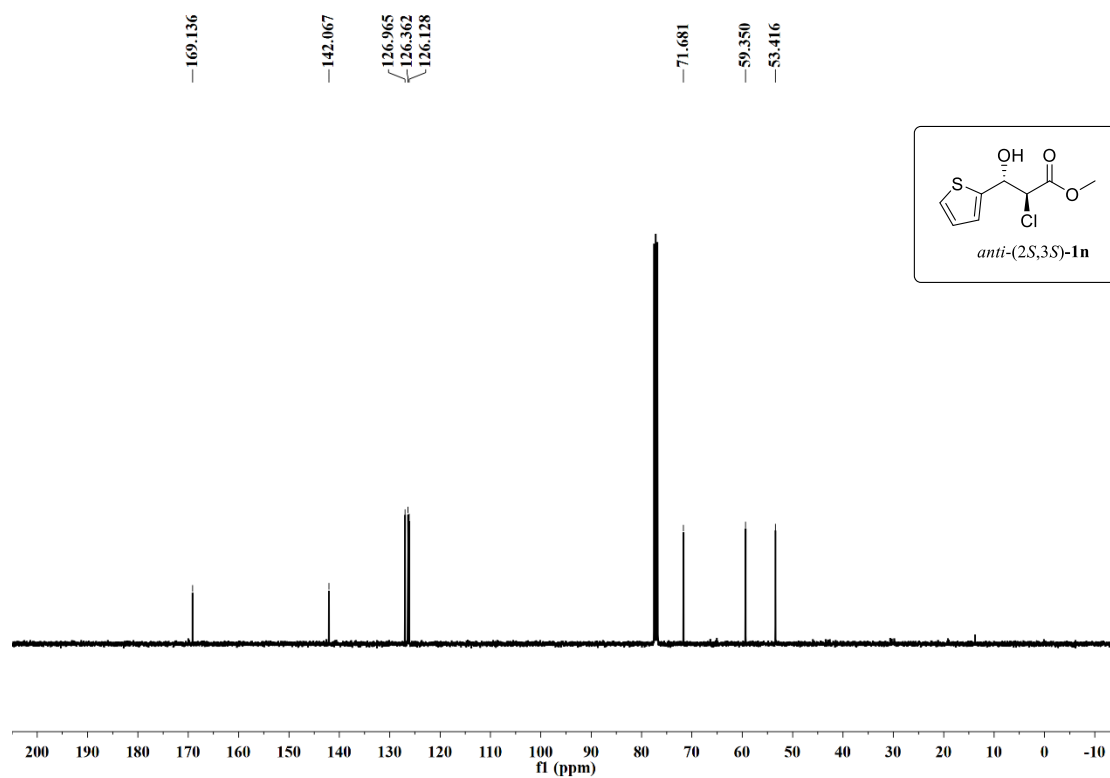

The  $^1\text{H}$  NMR (400 MHz,  $\text{CDCl}_3$ ) Spectrum of **1o**

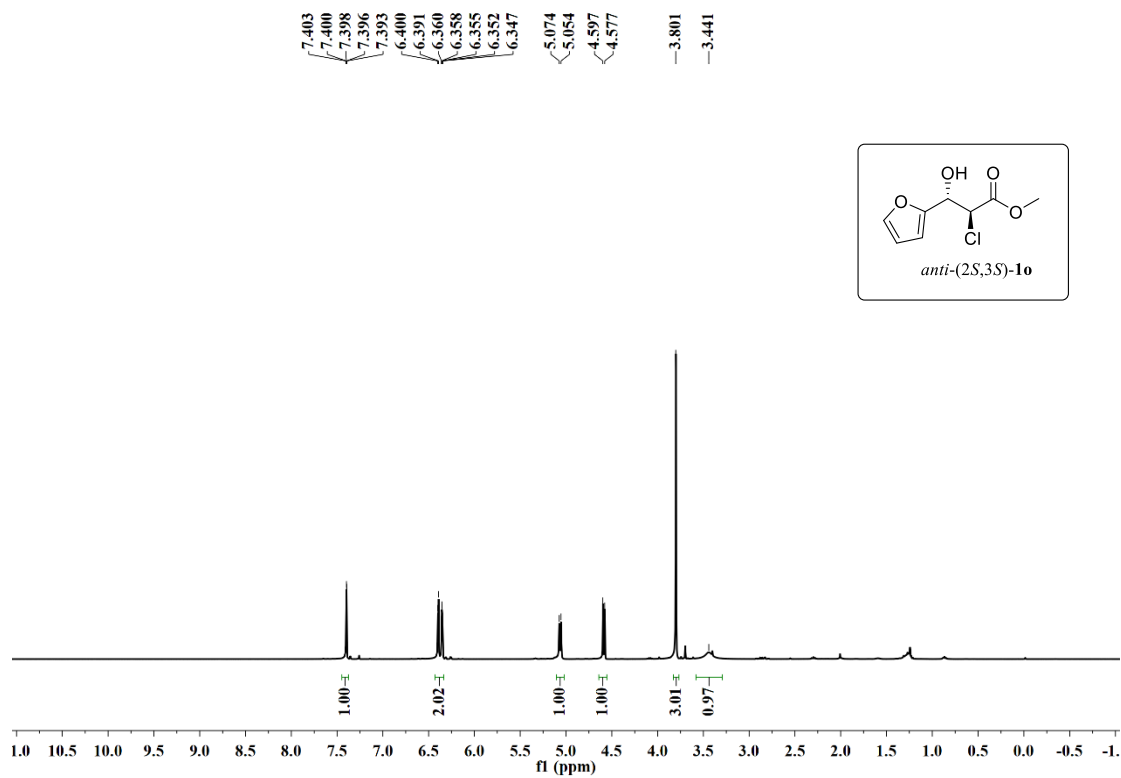

The  $^{13}\text{C}$  NMR (100 MHz,  $\text{CDCl}_3$ ) Spectrum of **1o**

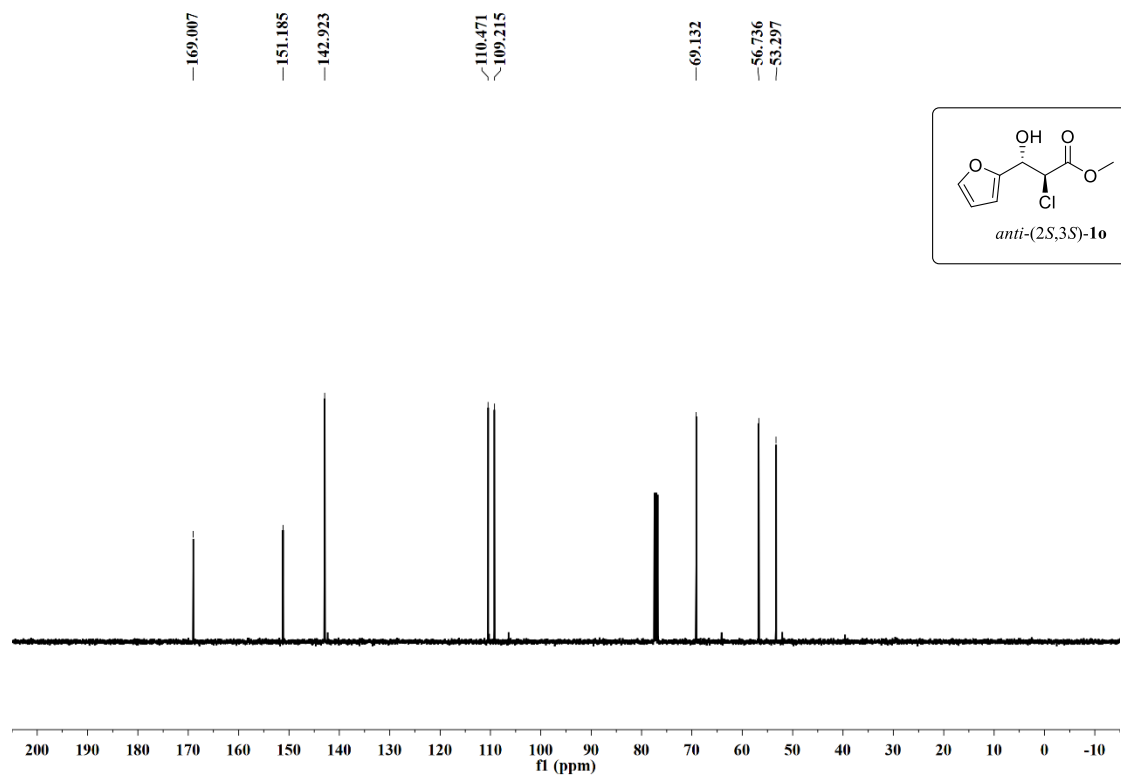

The  $^1\text{H}$  NMR (400 MHz,  $\text{CDCl}_3$ ) Spectrum of **9**

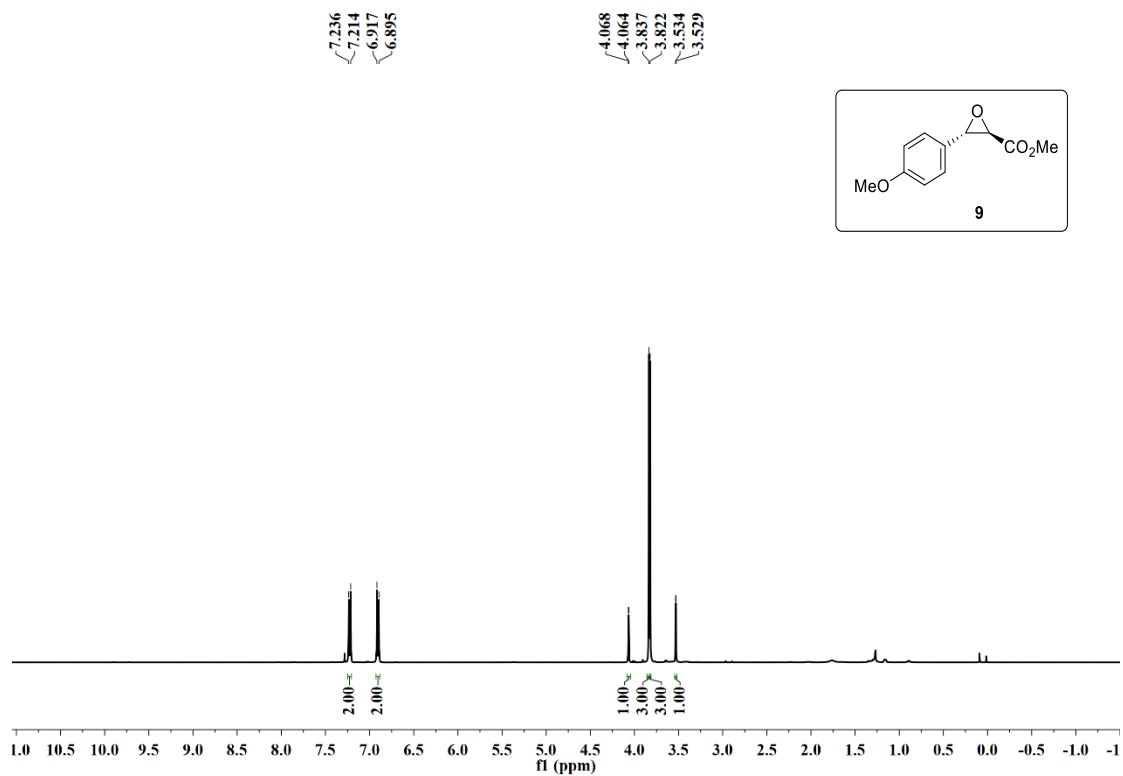

The  $^{13}\text{C}$  NMR (100 MHz,  $\text{CDCl}_3$ ) Spectrum of **9**

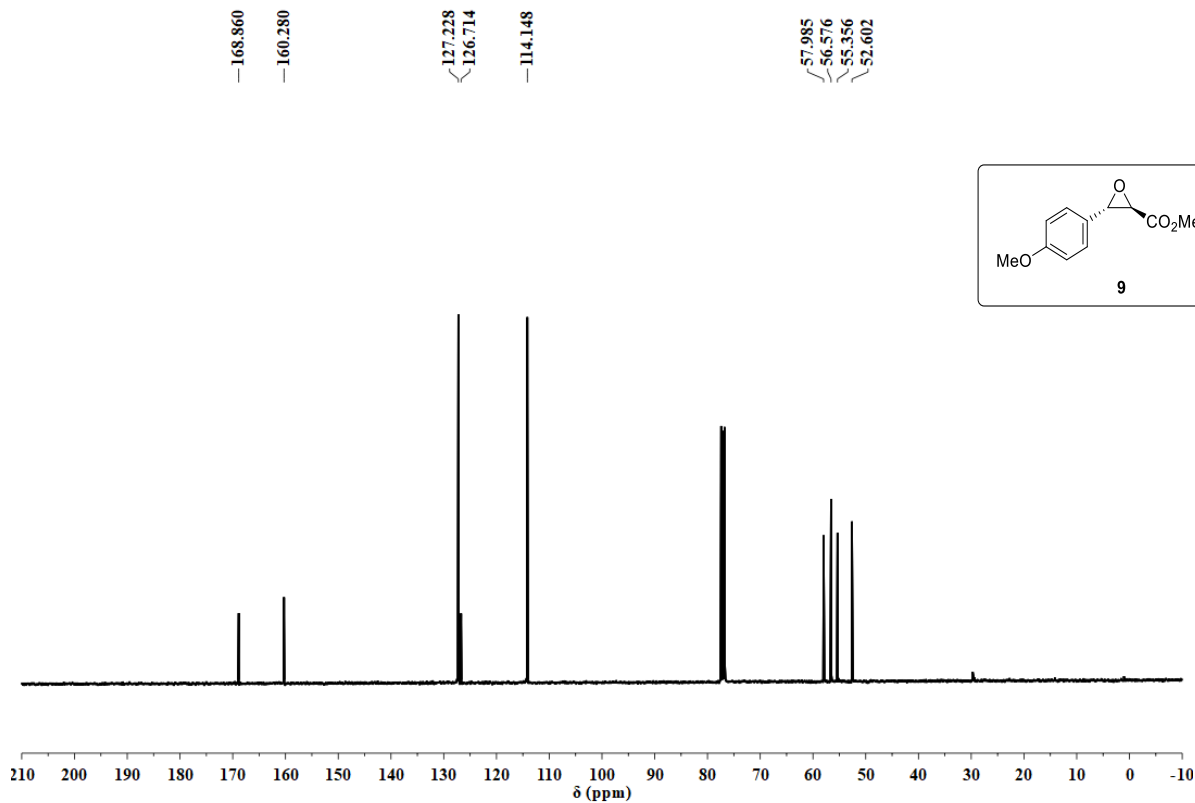

The  $^1\text{H}$  NMR (400 MHz,  $\text{DMSO-d}_6$ ) Spectrum of **12a**

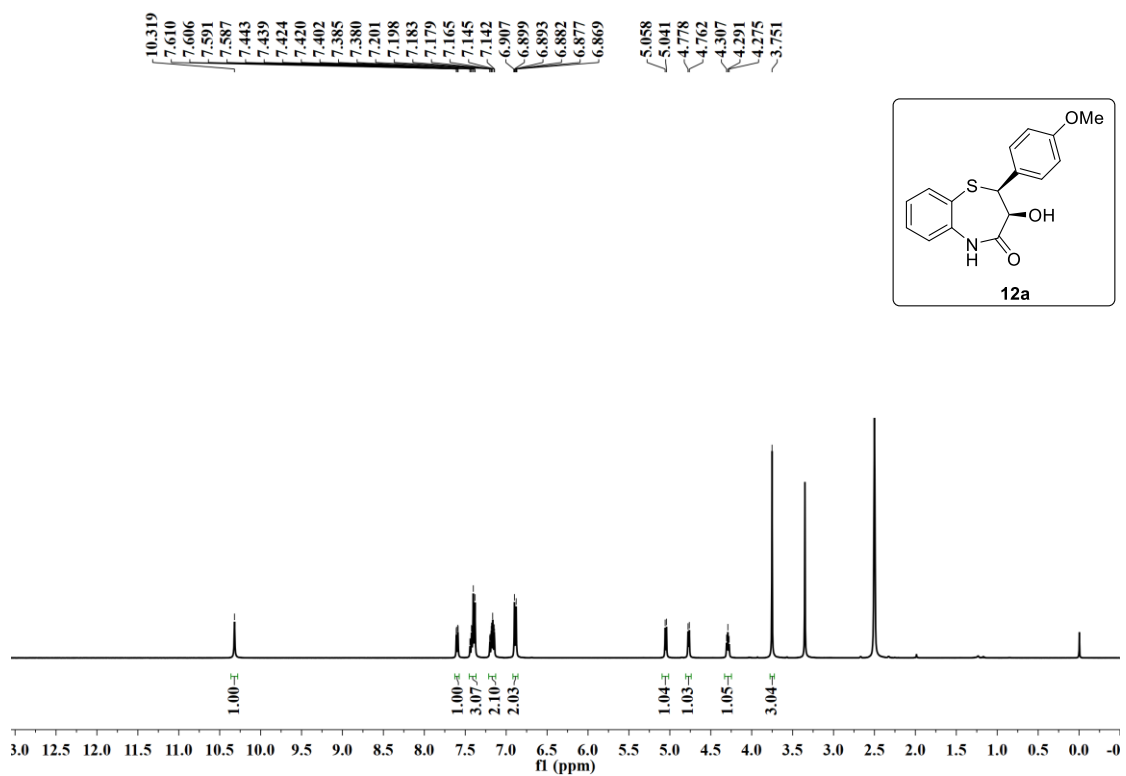

The  $^{13}\text{C}$  NMR (100 MHz,  $\text{DMSO-d}_6$ ) Spectrum of **12a**

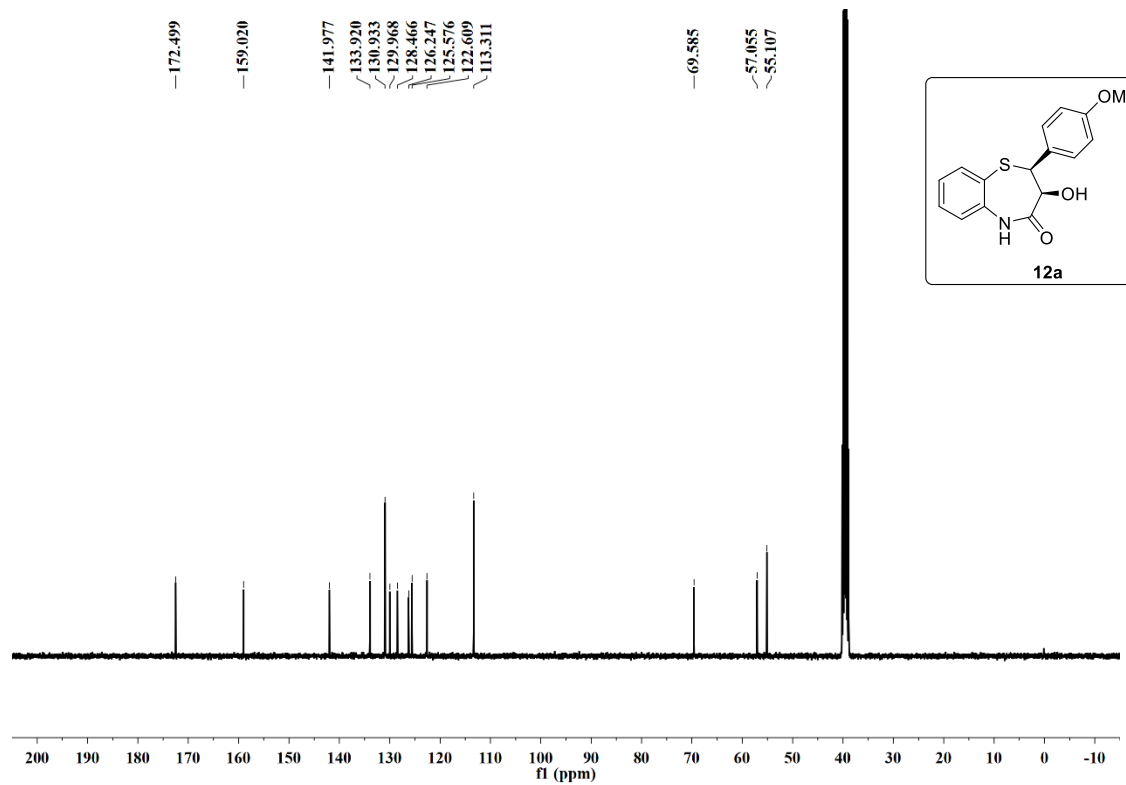

The  $^1\text{H}$  NMR (400 MHz,  $\text{CDCl}_3$ ) Spectrum of **13a**

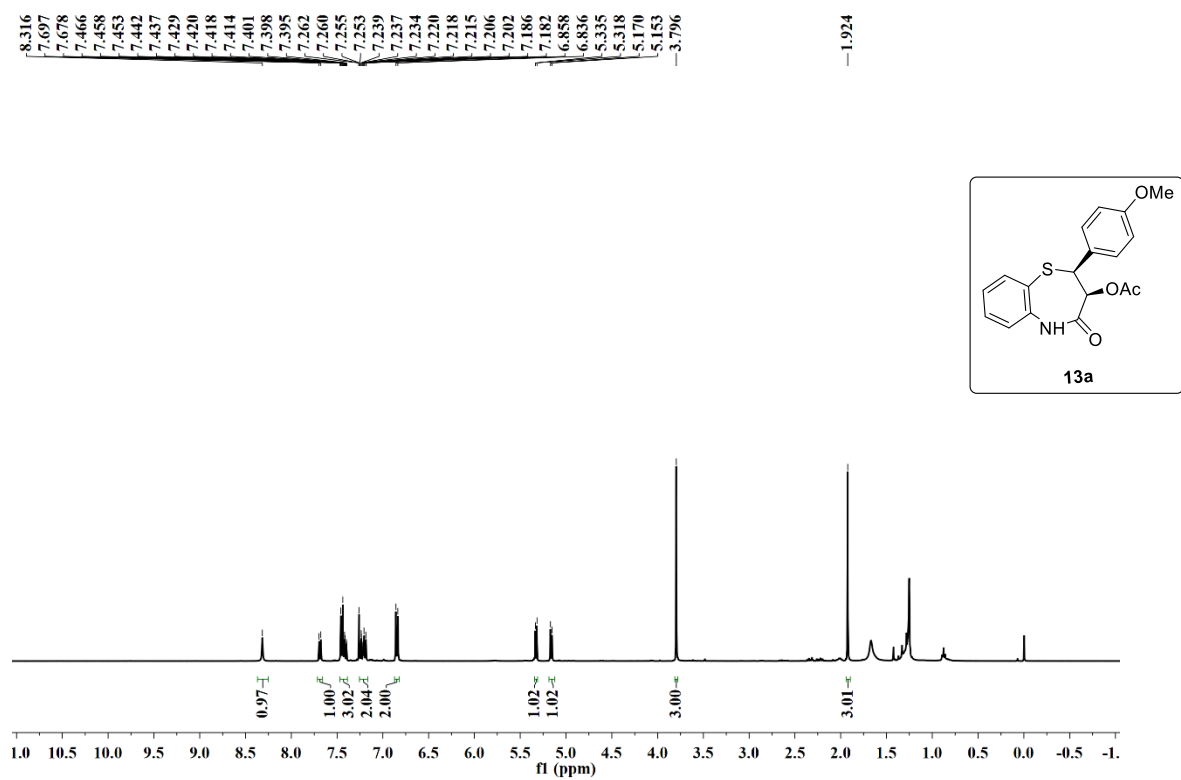

The  $^{13}\text{C}$  NMR (100 MHz,  $\text{CDCl}_3$ ) Spectrum of **13a**

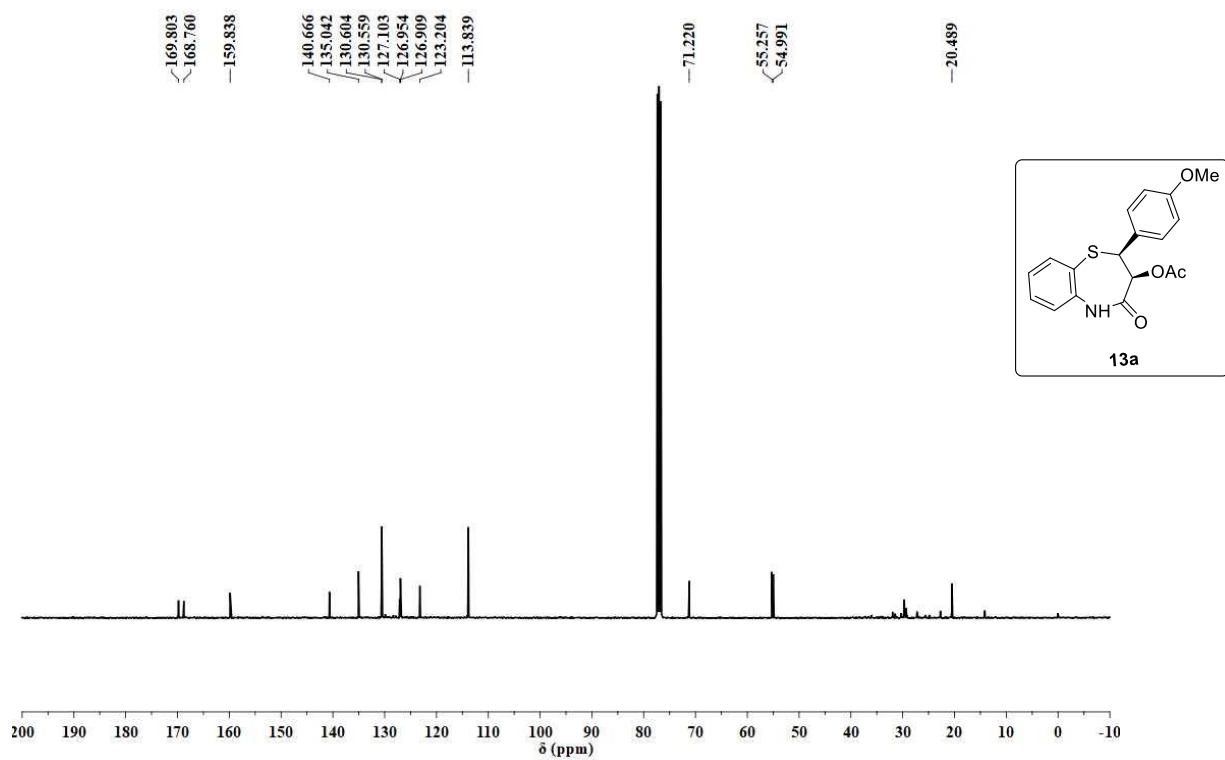

The  $^1\text{H}$  NMR (400 MHz,  $\text{CDCl}_3$ ) Spectrum of **3**

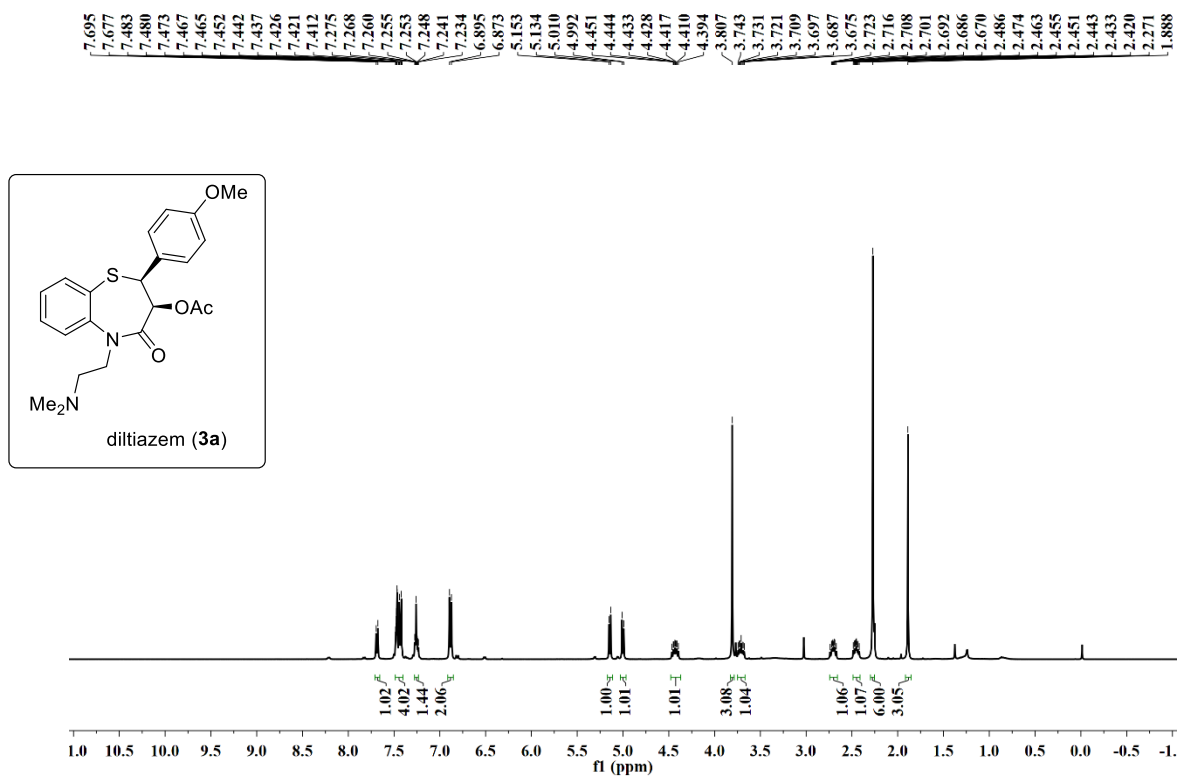

The  $^{13}\text{C}$  NMR (100 MHz,  $\text{CDCl}_3$ ) Spectrum of **3**

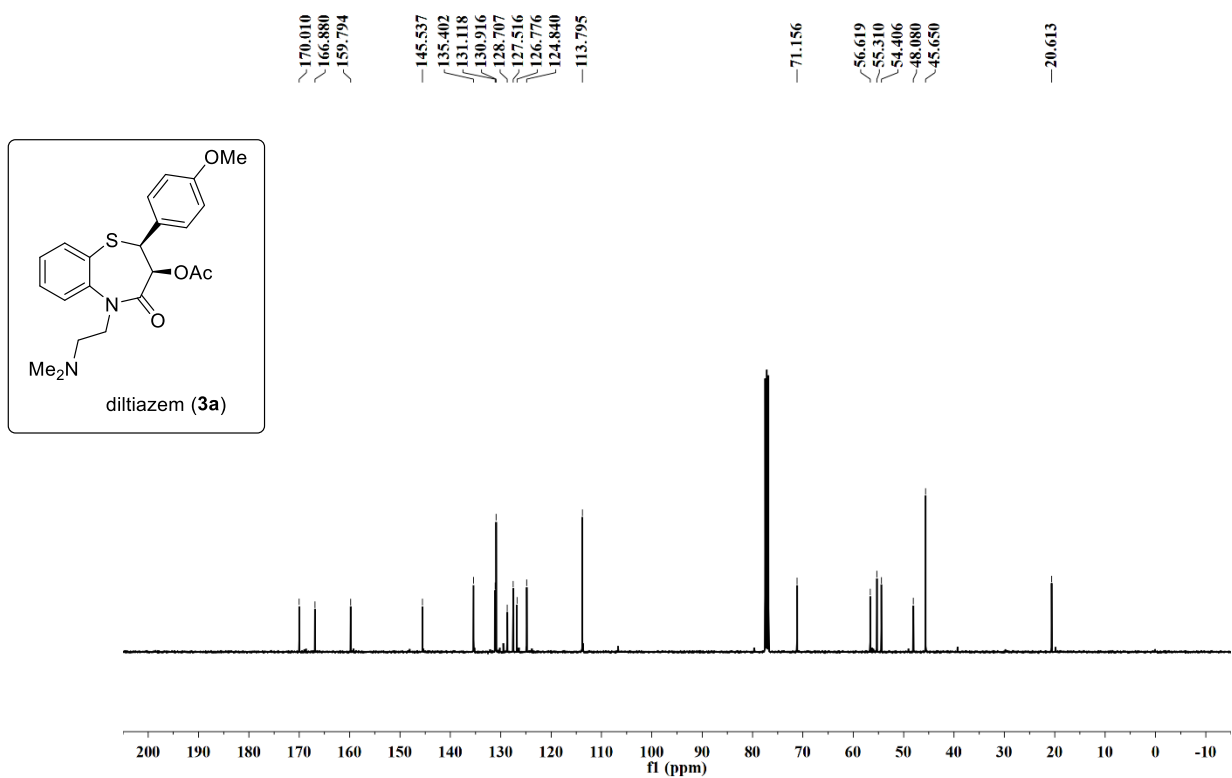



The  $^1\text{H}$  NMR (400 MHz,  $\text{CDCl}_3$ ) Spectrum of **10a**

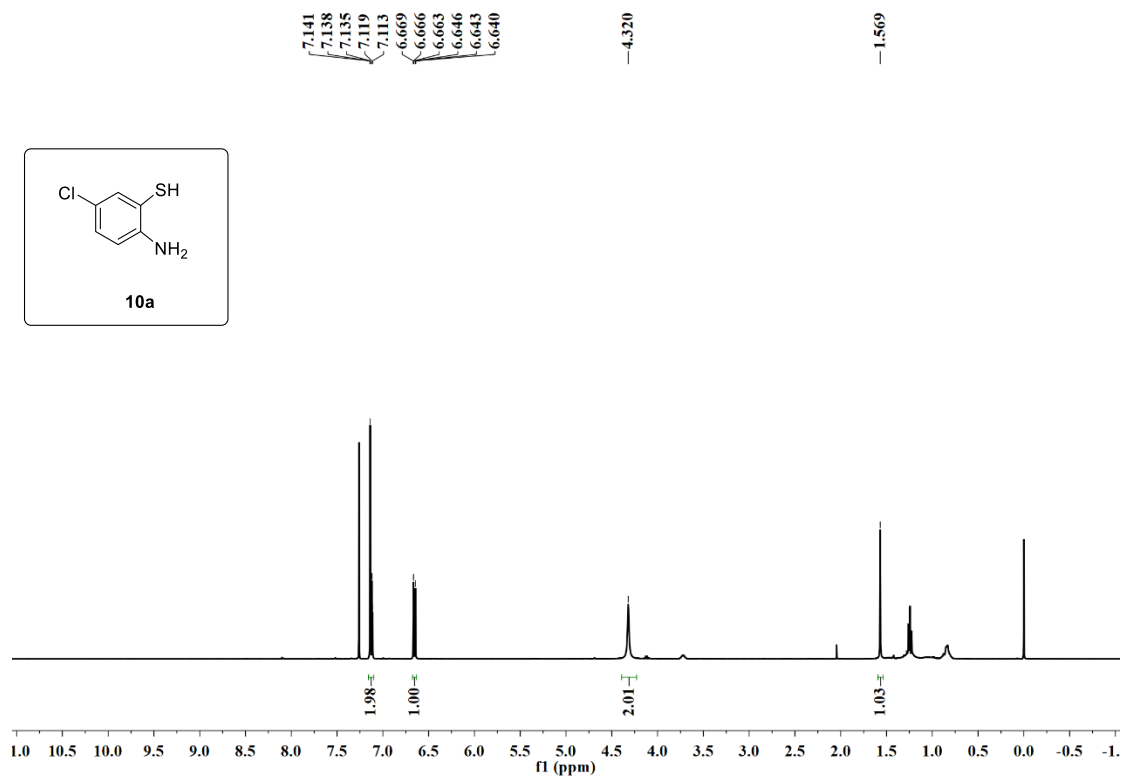

The  $^{13}\text{C}$  NMR (100 MHz,  $\text{CDCl}_3$ ) Spectrum of **10a**

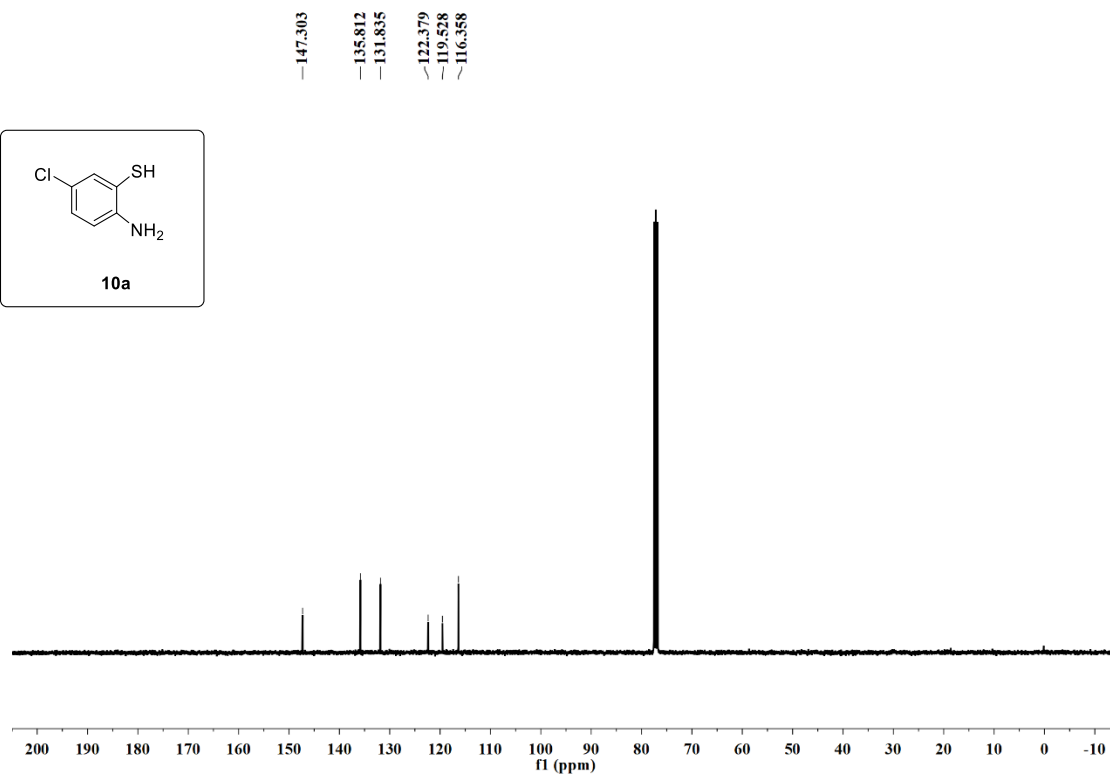

The  $^1\text{H}$  NMR (400 MHz,  $\text{DMSO-d}_6$ ) Spectrum of **12b**

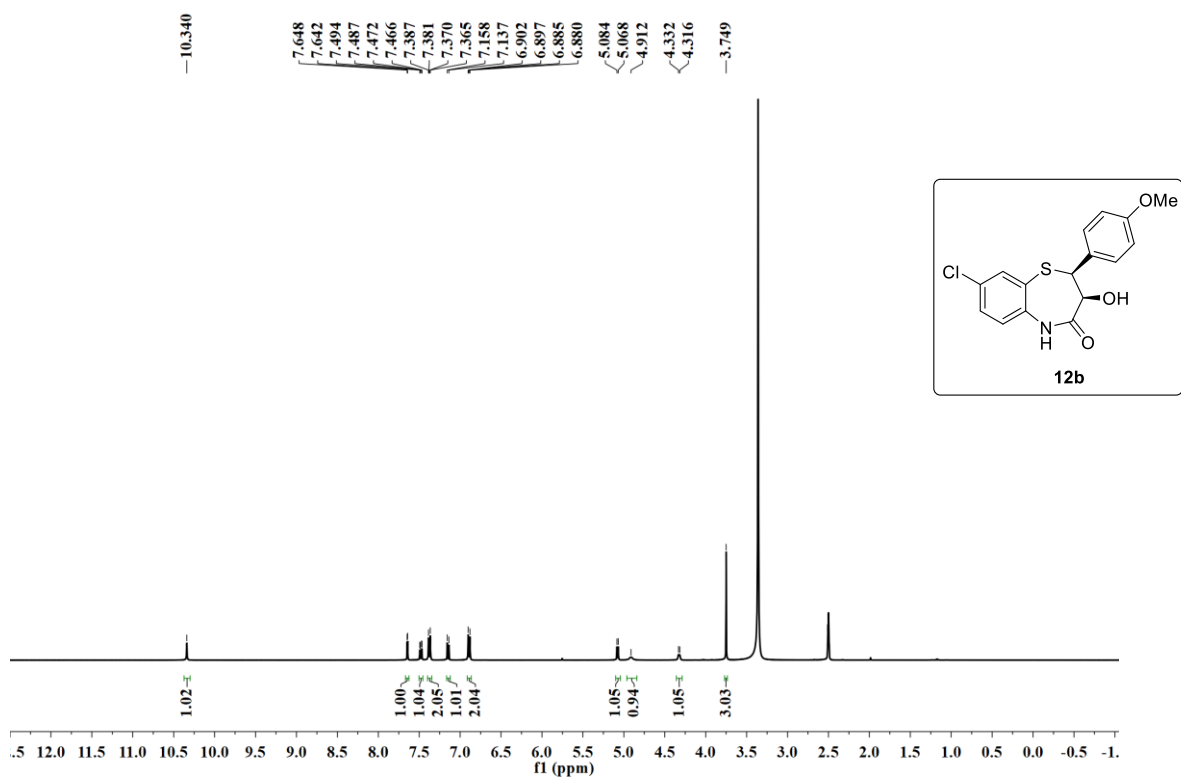

The  $^{13}\text{C}$  NMR (100 MHz,  $\text{DMSO-d}_6$ ) Spectrum of **12b**

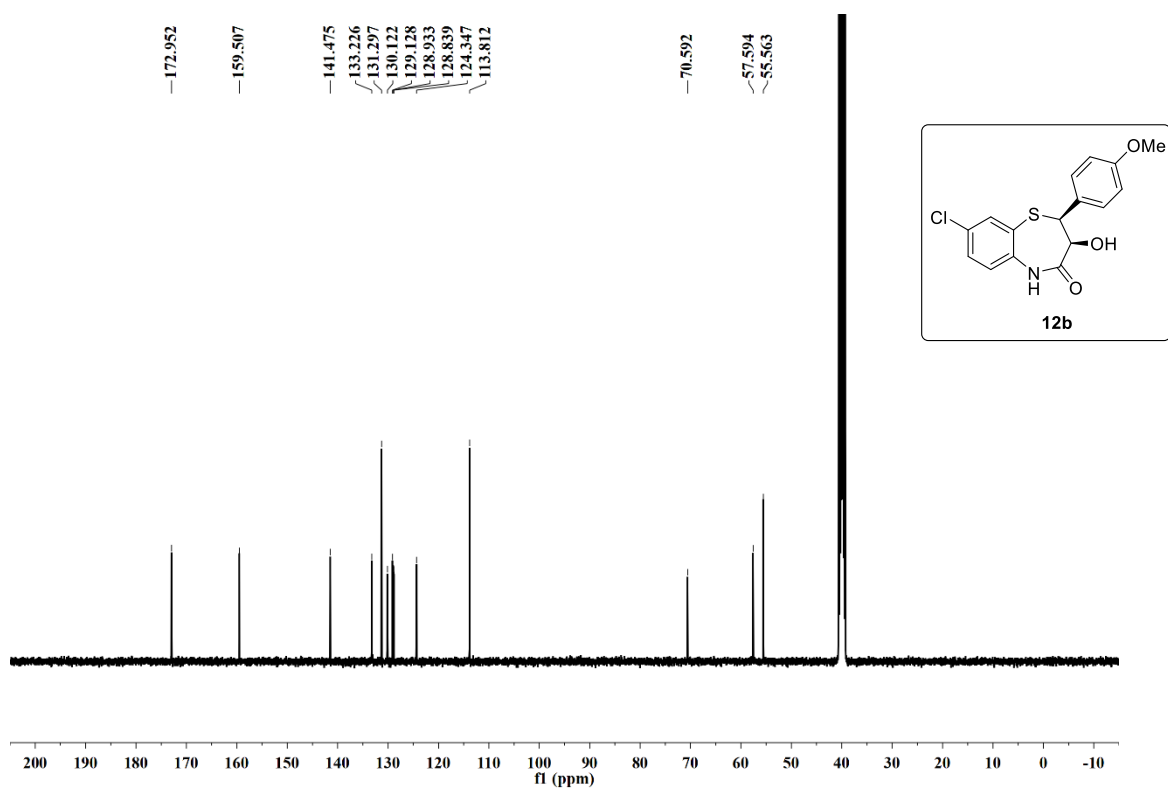

The  $^1\text{H}$  NMR (400 MHz,  $\text{CDCl}_3$ ) Spectrum of **13b**

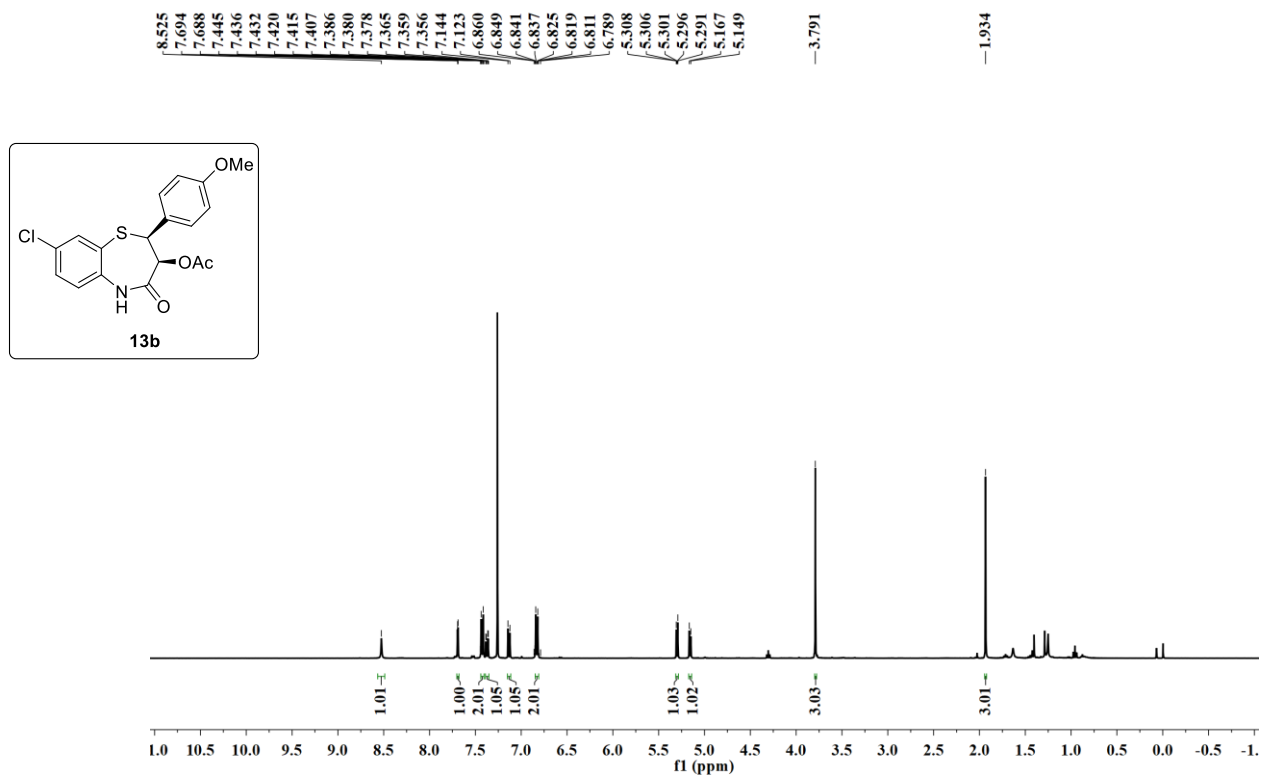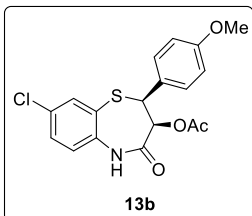

The  $^{13}\text{C}$  NMR (100 MHz,  $\text{CDCl}_3$ ) Spectrum of **13b**

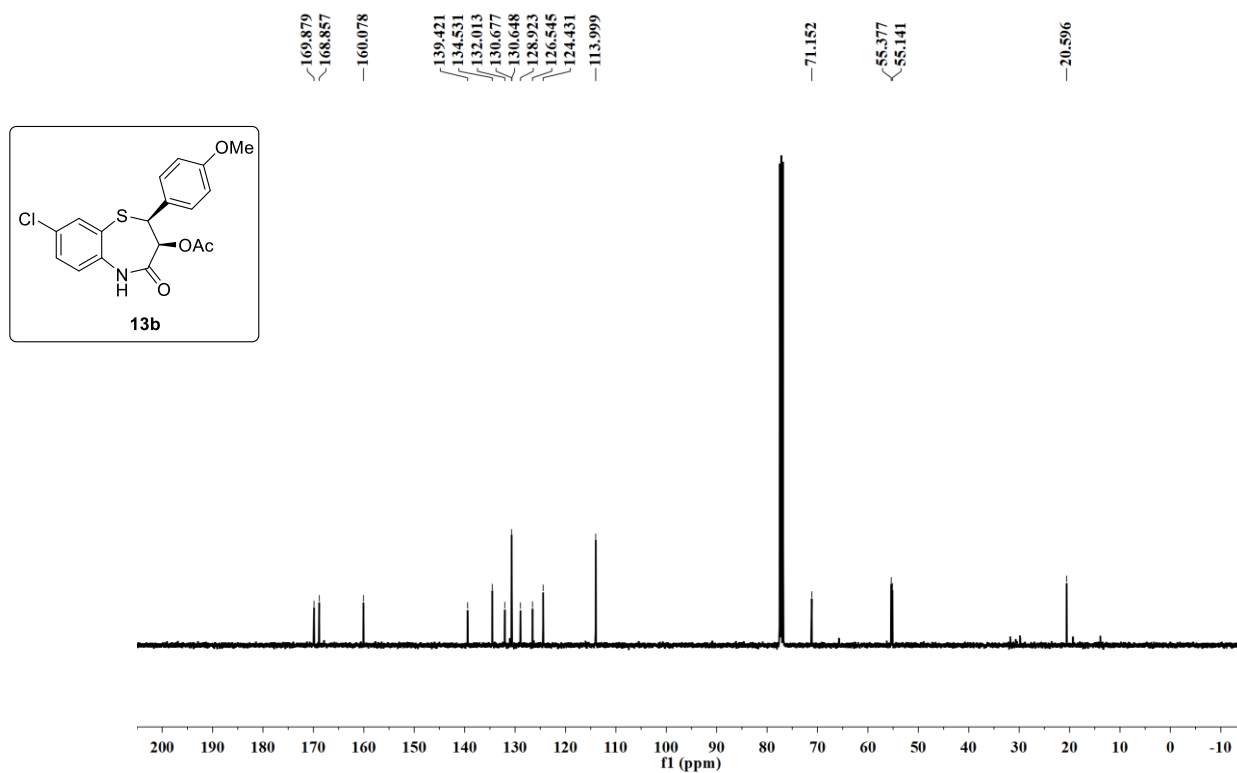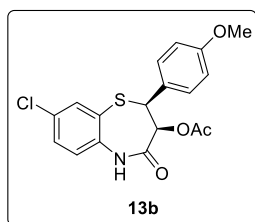

The  $^1\text{H}$  NMR (400 MHz,  $\text{CDCl}_3$ ) Spectrum of **15**

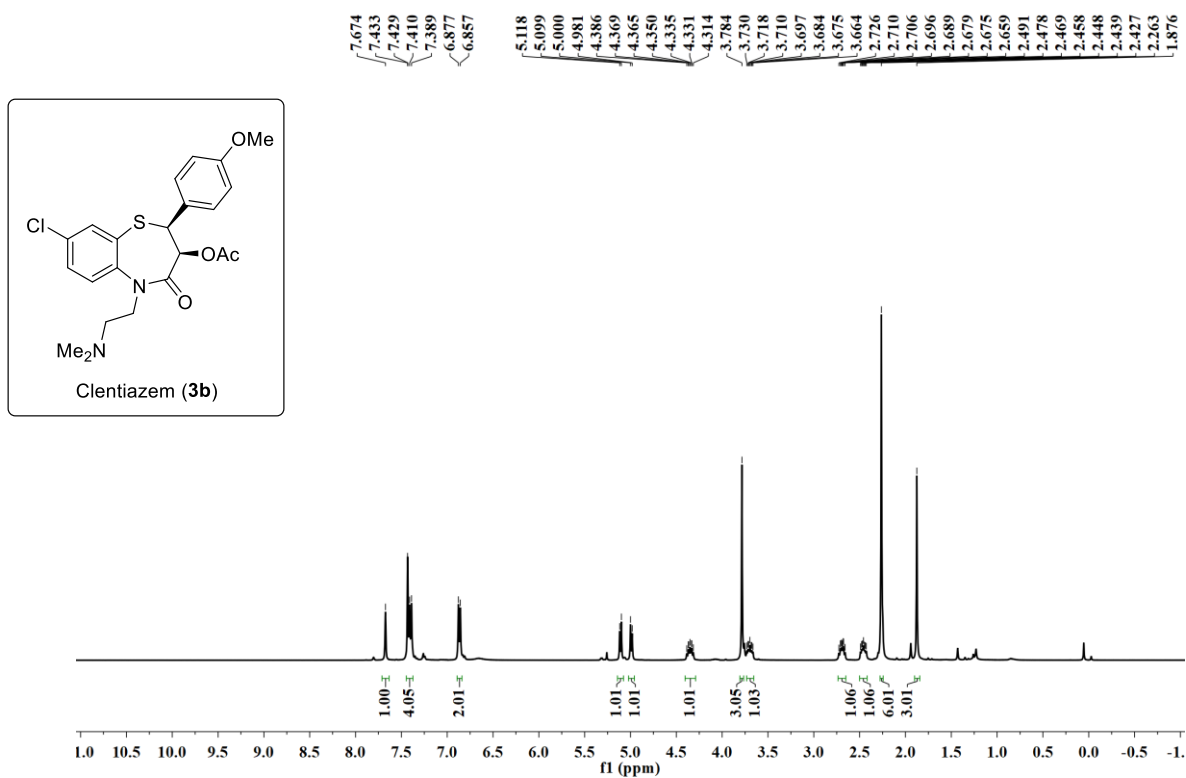

The  $^{13}\text{C}$  NMR (100 MHz,  $\text{CDCl}_3$ ) Spectrum of **15**

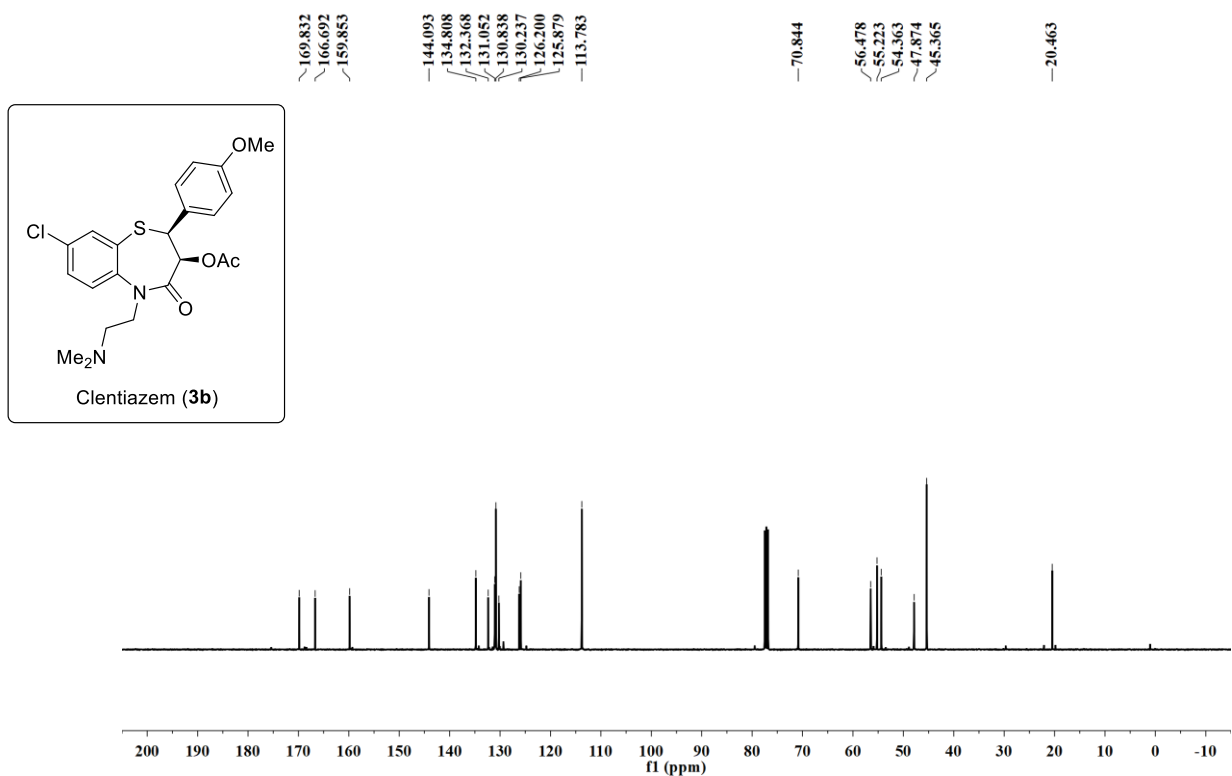

The  $^1\text{H}$  NMR (400 MHz,  $\text{CDCl}_3$ ) Spectrum of **16**

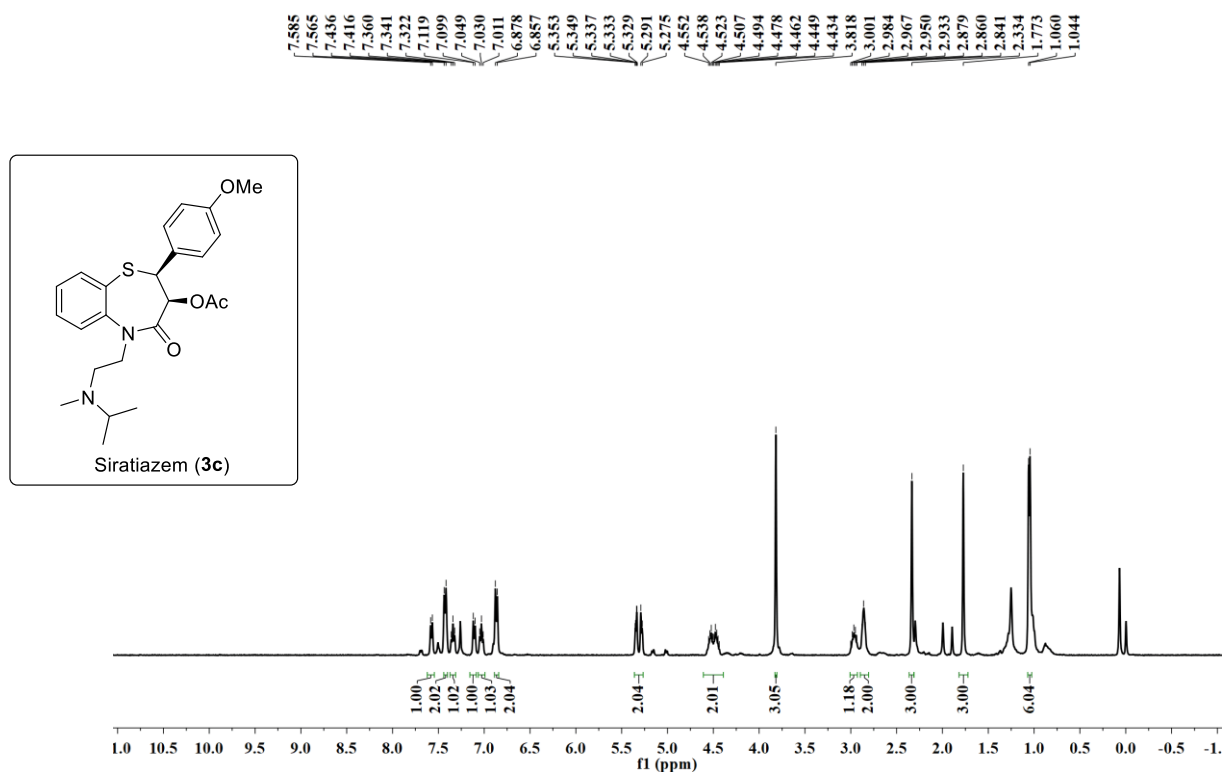

The  $^{13}\text{C}$  NMR (100 MHz,  $\text{CDCl}_3$ ) Spectrum of **16**

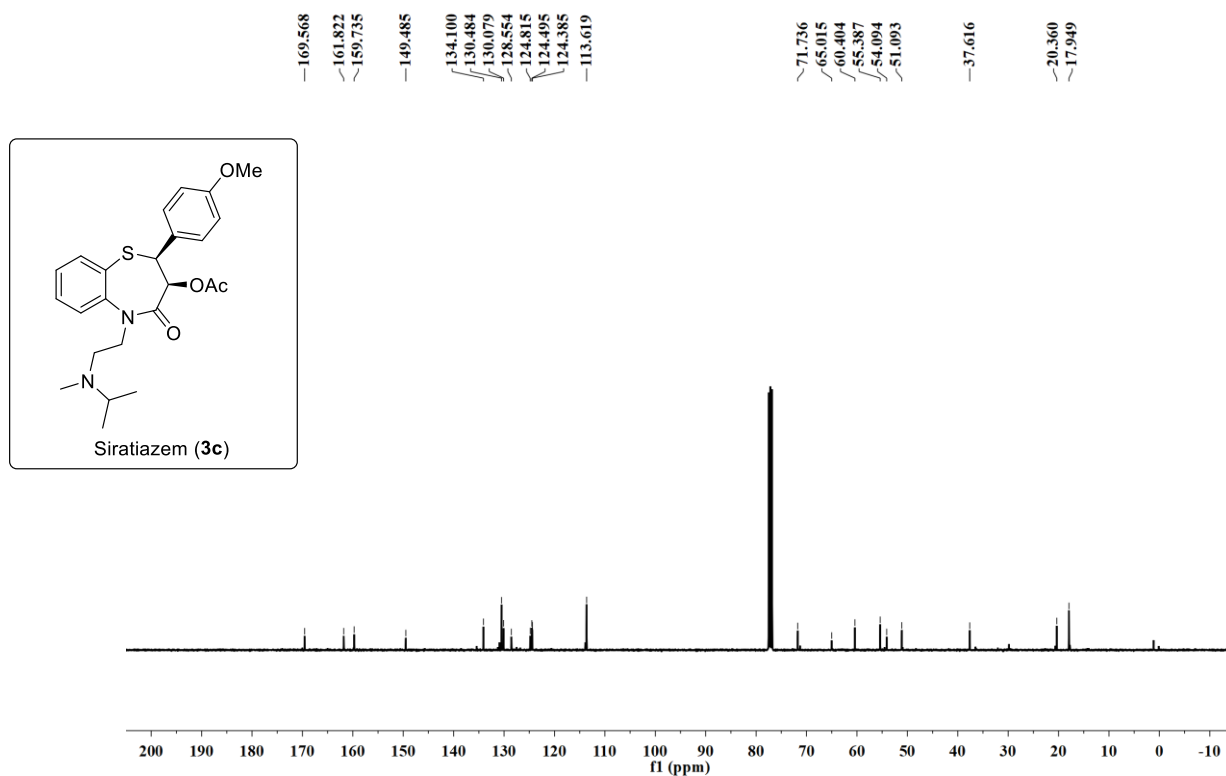

### Reduction of 6a with NaBH<sub>4</sub>

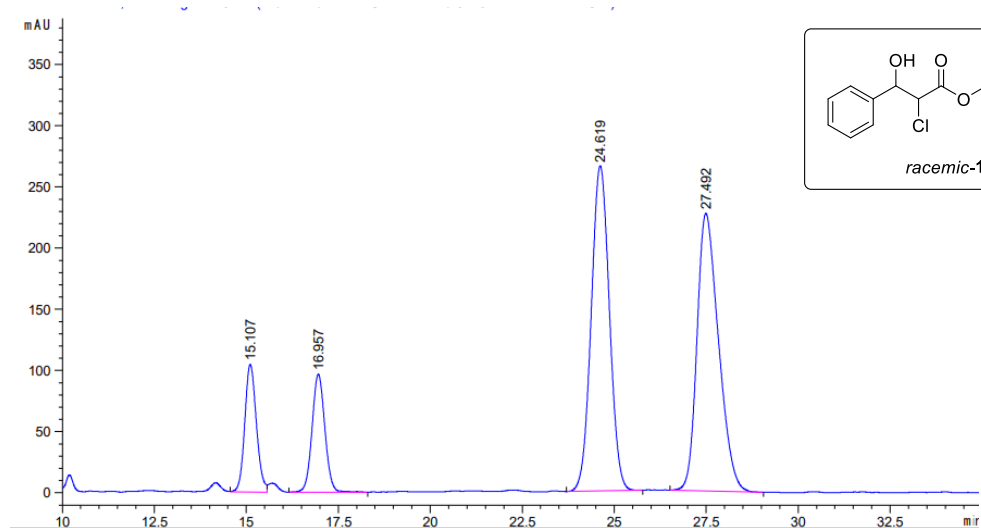

| peak # | retention time [min] | type | peak width [min] | peak area [mAU*s] | peak height [mAU] | peak area % |
|--------|----------------------|------|------------------|-------------------|-------------------|-------------|
| 1      | 15.106               | VV   | 0.3396           | 2296.13257        | 104.39244         | 10.0074     |
| 2      | 16.956               | BB   | 0.3720           | 2308.53882        | 96.18604          | 10.0615     |
| 3      | 24.619               | BB   | 0.5349           | 9109.49902        | 265.78278         | 39.7025     |
| 4      | 27.492               | BB   | 0.6143           | 9230.21973        | 227.03760         | 40.2287     |

### Bioreduction of 6a with LfSDR1

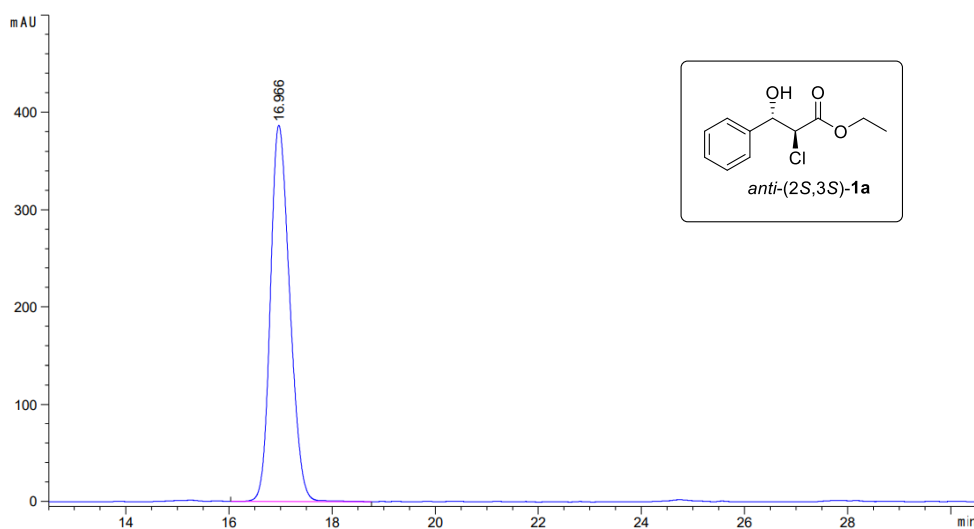

| peak # | retention time [min] | type | peak width [min] | peak area [mAU*s] | peak height [mAU] | peak area % |
|--------|----------------------|------|------------------|-------------------|-------------------|-------------|
| 1      | 16.966               | BB   | 0.4052           | 1.01099e4         | 386.51373         | 100.0000    |

### Reduction of **6b** with NaBH<sub>4</sub>

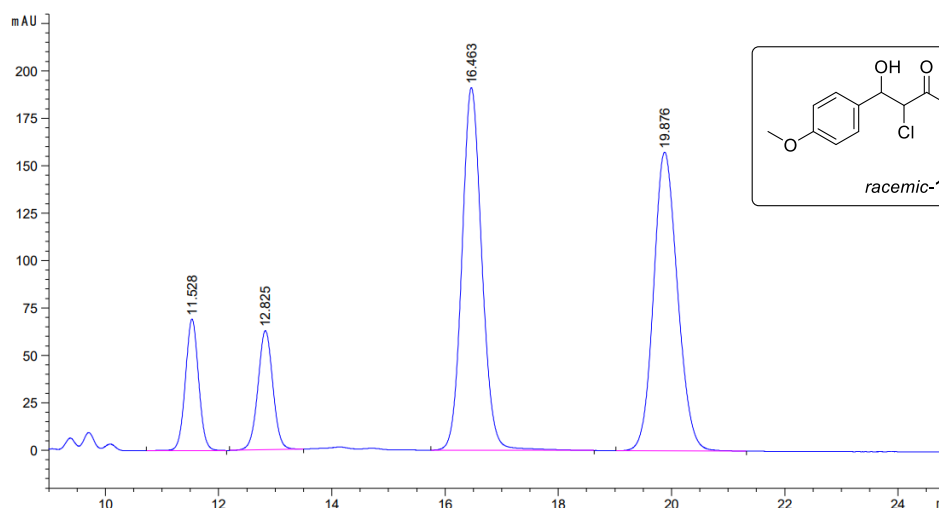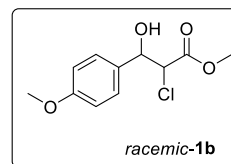

| peak # | retention time [min] | type | peak width [min] | peak area [mAU*s] | peak height [mAU] | peak area % |
|--------|----------------------|------|------------------|-------------------|-------------------|-------------|
| 峰 #    | 保留时间 [min]           | 类型   | 峰宽 [min]         | 峰面积 [mAU*s]       | 峰高 [mAU]          | 峰面积 %       |
| 1      | 11.528               | BB   | 0.2505           | 1126.33936        | 69.39761          | 9.7299      |
| 2      | 12.825               | BB   | 0.2834           | 1149.53467        | 62.82388          | 9.9303      |
| 3      | 16.463               | BB   | 0.3753           | 4673.19043        | 191.25017         | 40.3694     |
| 4      | 19.876               | BB   | 0.4518           | 4627.00781        | 157.54982         | 39.9704     |

### Bioreduction of **6b** with LfSDR1

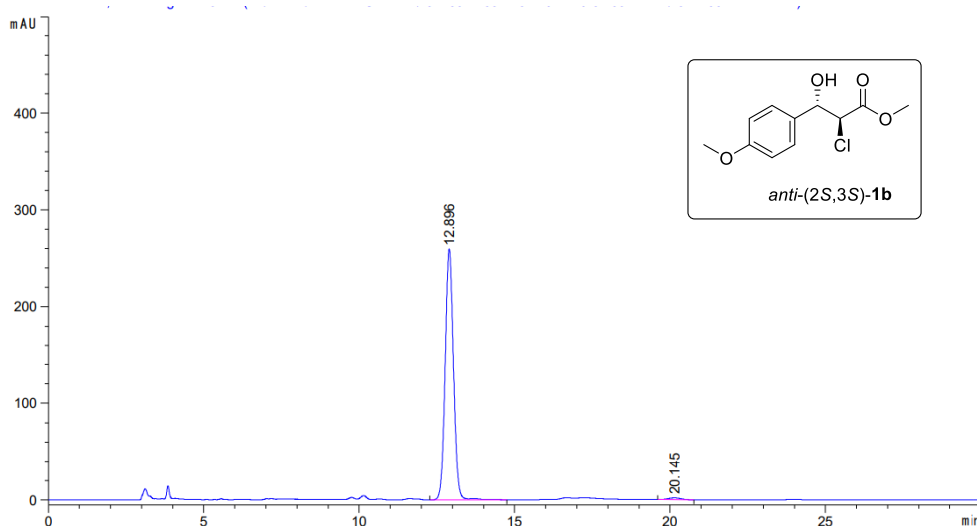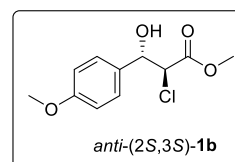

| peak # | retention time [min] | type | peak width [min] | peak area [mAU*s] | peak height [mAU] | peak area % |
|--------|----------------------|------|------------------|-------------------|-------------------|-------------|
| 峰 #    | 保留时间 [min]           | 类型   | 峰宽 [min]         | 峰面积 [mAU*s]       | 峰高 [mAU]          | 峰面积 %       |
| 1      | 12.896               | BV R | 0.2865           | 4818.60742        | 259.58603         | 98.9218     |
| 2      | 20.145               | BB   | 0.3807           | 52.52224          | 1.89147           | 1.0782      |

### Reduction of **6c** with NaBH<sub>4</sub>

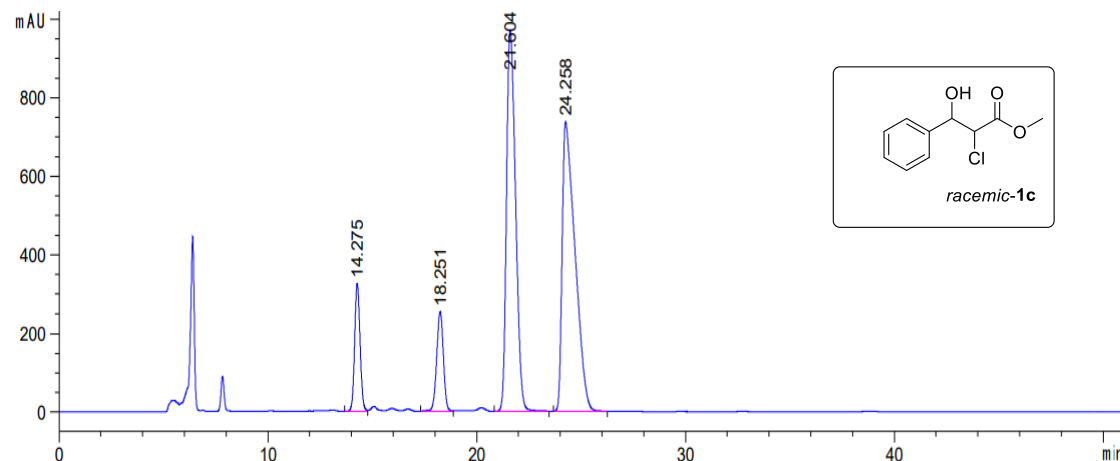

| peak # | retention time [min] | type | peak width [min] | peak area [mAU*s] | peak height [mAU] | peak area % |
|--------|----------------------|------|------------------|-------------------|-------------------|-------------|
| 峰 #    | 保留时间 [min]           | 类型   | 峰宽 [min]         | 峰面积 [mAU*s]       | 峰高 [mAU]          | 峰面积 %       |
| 1      | 14.275               | BV   | 0.2834           | 5929.38086        | 326.23514         | 8.1889      |
| 2      | 18.251               | BB   | 0.3545           | 5748.37305        | 253.83910         | 7.9389      |
| 3      | 21.604               | VB   | 0.4801           | 2.93168e4         | 971.87659         | 40.4885     |
| 4      | 24.258               | BB   | 0.6423           | 3.14131e4         | 737.81470         | 43.3837     |

### Bioreduction of **6c** with LfSDR1

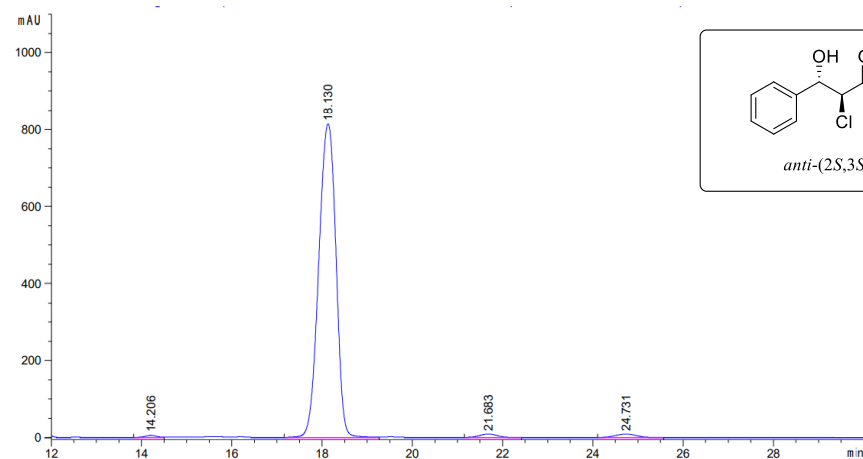

| peak # | retention time [min] | type | peak width [min] | peak area [mAU*s] | peak height [mAU] | peak area % |
|--------|----------------------|------|------------------|-------------------|-------------------|-------------|
| 峰 #    | 保留时间 [min]           | 类型   | 峰宽 [min]         | 峰面积 [mAU*s]       | 峰高 [mAU]          | 峰面积 %       |
| 1      | 14.206               | BV   | 0.2794           | 96.30255          | 5.36230           | 0.4355      |
| 2      | 18.130               | BB   | 0.4273           | 2.15045e4         | 814.81421         | 97.2451     |
| 3      | 21.683               | BB   | 0.4066           | 231.82509         | 8.87759           | 1.0483      |
| 4      | 24.731               | BB   | 0.4877           | 281.08383         | 8.97549           | 1.2711      |



### Reduction of **6d** with NaBH<sub>4</sub>

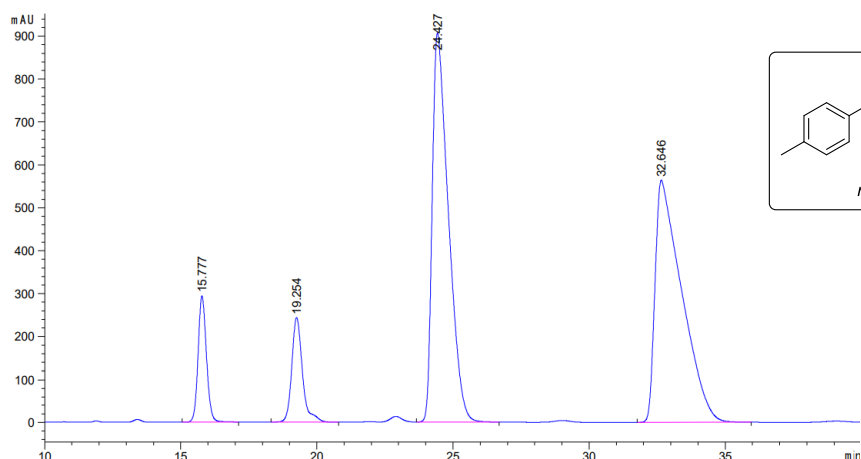

| peak # | retention time [min] | type | peak width [min] | peak area [mAU*s] | peak height [mAU] | peak area % |
|--------|----------------------|------|------------------|-------------------|-------------------|-------------|
| 峰 #    | 保留时间 [min]           | 类型   | 峰宽 [min]         | 峰面积 [mAU*s]       | 峰高 [mAU]          | 峰面积 %       |
| 1      | 15.777               | BB   | 0.3279           | 6287.93311        | 294.29660         | 7.0803      |
| 2      | 19.254               | BB   | 0.4154           | 6667.75391        | 243.65475         | 7.5080      |
| 3      | 24.427               | BB   | 0.6243           | 3.74342e4         | 906.87238         | 42.1518     |
| 4      | 32.646               | BB   | 0.9442           | 3.84183e4         | 564.30450         | 43.2599     |

### Bioreduction of **6d** with LfSDR1

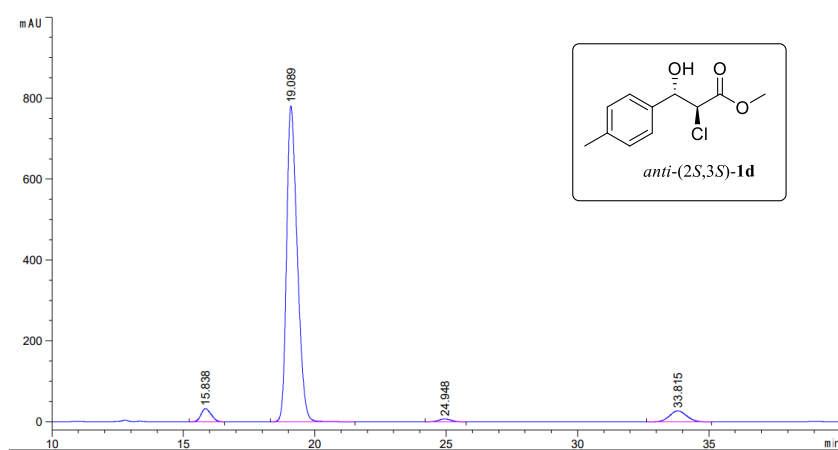

| peak # | retention time [min] | type | peak width [min] | peak area [mAU*s] | peak height [mAU] | peak area % |
|--------|----------------------|------|------------------|-------------------|-------------------|-------------|
| 峰 #    | 保留时间 [min]           | 类型   | 峰宽 [min]         | 峰面积 [mAU*s]       | 峰高 [mAU]          | 峰面积 %       |
| 1      | 15.838               | BB   | 0.4274           | 865.11395         | 32.46219          | 3.5586      |
| 2      | 19.089               | BB   | 0.4331           | 2.19681e4         | 780.80920         | 90.3640     |
| 3      | 24.948               | BB   | 0.4818           | 237.19223         | 7.17468           | 0.9757      |
| 4      | 33.815               | BB   | 0.6899           | 1240.27795        | 27.31751          | 5.1018      |

### Reduction of **6e** with NaBH<sub>4</sub>

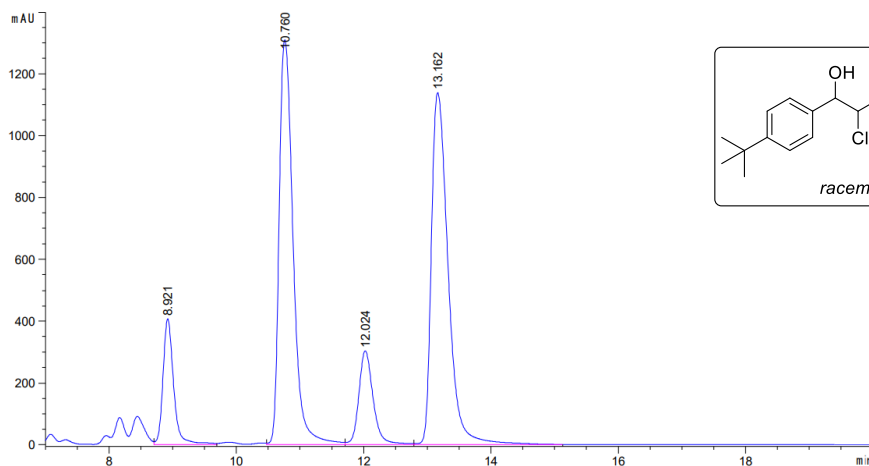

| peak # | retention time [min] | type | peak width [min] | peak area [mAU*s] | peak height [mAU] | peak area % |
|--------|----------------------|------|------------------|-------------------|-------------------|-------------|
| 峰 #    | 保留时间 [min]           | 类型   | 峰宽 [min]         | 峰面积 [mAU*s]       | 峰高 [mAU]          | 峰面积 %       |
| 1      | 8.921                | VV   | 0.1782           | 4743.37109        | 406.92874         | 9.4723      |
| 2      | 10.760               | VV   | 0.2369           | 1.98831e4         | 1309.03308        | 39.7054     |
| 3      | 12.024               | VV   | 0.2367           | 4714.09766        | 303.29465         | 9.4138      |
| 4      | 13.162               | VB   | 0.2824           | 2.07359e4         | 1138.20532        | 41.4085     |

### Bioreduction of **6e** with LfSDR1

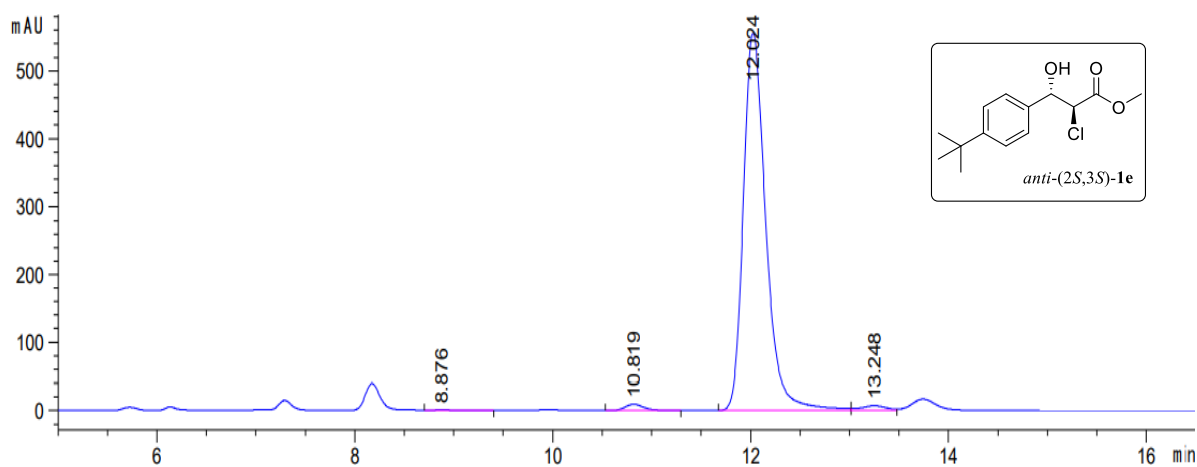

| peak # | retention time [min] | type | peak width [min] | peak area [mAU*s] | peak height [mAU] | peak area % |
|--------|----------------------|------|------------------|-------------------|-------------------|-------------|
| 峰 #    | 保留时间 [min]           | 类型   | 峰宽 [min]         | 峰面积 [mAU*s]       | 峰高 [mAU]          | 峰面积 %       |
| 1      | 8.876                | VB   | 0.2493           | 17.55627          | 1.05598           | 0.1944      |
| 2      | 10.819               | VB   | 0.2083           | 127.12845         | 9.33746           | 1.4079      |
| 3      | 12.024               | BV   | 0.2422           | 8757.90625        | 555.36810         | 96.9872     |
| 4      | 13.248               | VV   | 0.2650           | 127.37279         | 7.08786           | 1.4106      |

### Reduction of **6f** with NaBH<sub>4</sub>

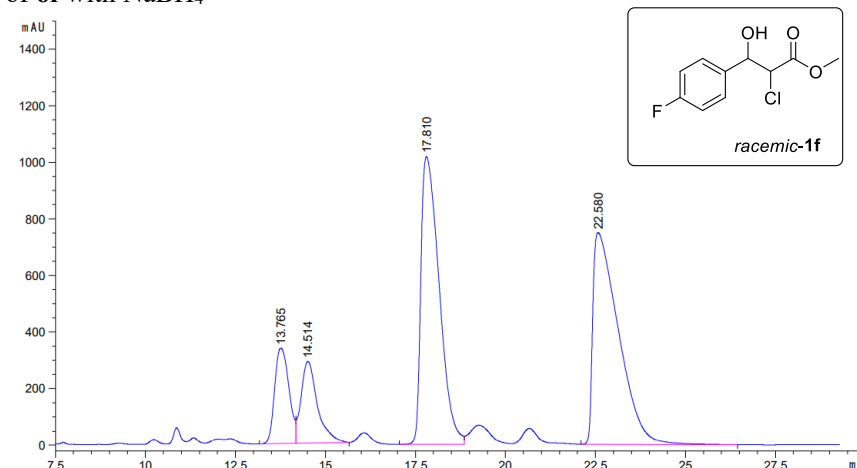

| peak # | retention time [min] | type | peak width [min] | peak area [mAU*s] | peak height [mAU] | peak area % |
|--------|----------------------|------|------------------|-------------------|-------------------|-------------|
| 峰 #    | 保留时间 [min]           | 类型   | 峰宽 [min]         | 峰面积 [mAU*s]       | 峰高 [mAU]          | 峰面积 %       |
| 1      | 13.765               | BV   | 0.4370           | 9295.65723        | 337.79834         | 10.1610     |
| 2      | 14.514               | VB   | 0.4742           | 9155.49609        | 288.51694         | 10.0078     |
| 3      | 17.810               | BV   | 0.5667           | 3.58153e4         | 1017.40430        | 39.1493     |
| 4      | 22.580               | BB   | 0.7759           | 3.72174e4         | 748.81421         | 40.6819     |

### Bioreduction of **6f** with LfSDR1

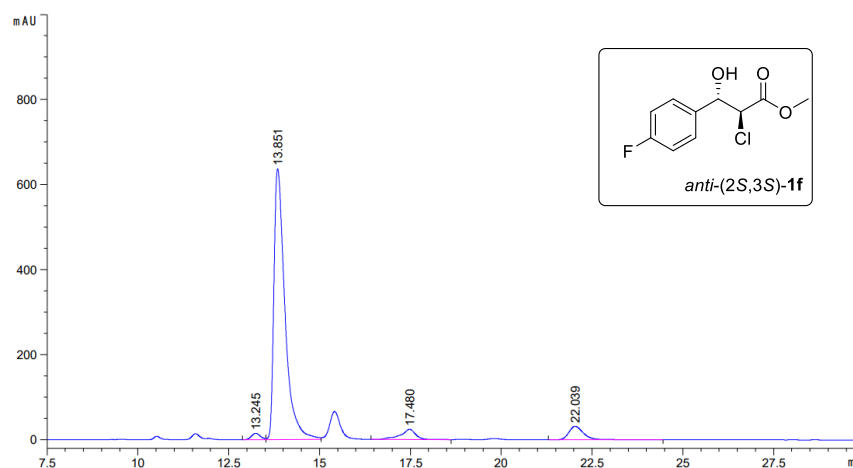

| peak # | retention time [min] | type | peak width [min] | peak area [mAU*s] | peak height [mAU] | peak area % |
|--------|----------------------|------|------------------|-------------------|-------------------|-------------|
| 峰 #    | 保留时间 [min]           | 类型   | 峰宽 [min]         | 峰面积 [mAU*s]       | 峰高 [mAU]          | 峰面积 %       |
| 1      | 13.245               | BV   | 0.2606           | 251.61391         | 14.93011          | 1.6402      |
| 2      | 13.851               | VV   | 0.3185           | 1.34673e4         | 637.52222         | 87.7877     |
| 3      | 17.480               | BB   | 0.4179           | 712.97198         | 24.04798          | 4.6476      |
| 4      | 22.039               | BB   | 0.4373           | 908.86371         | 31.81002          | 5.9245      |

### Reduction of **6g** with NaBH<sub>4</sub>

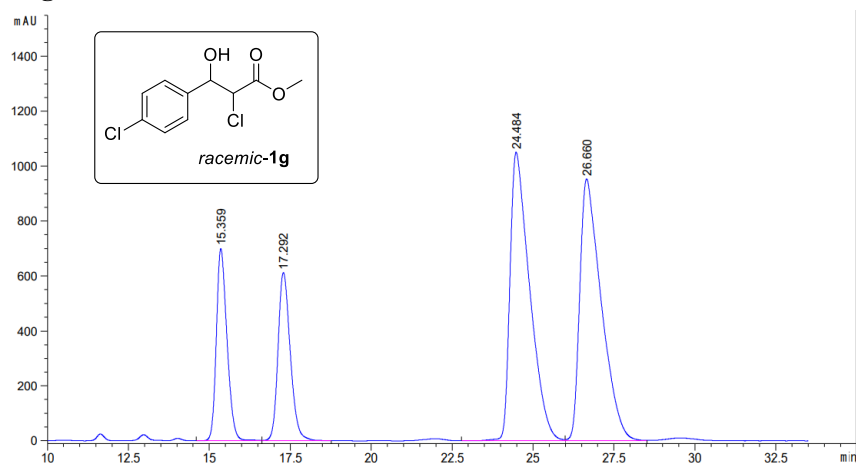

| peak # | retention time [min] | type | peak width [min] | peak area [mAU*s] | peak height [mAU] | peak area % |
|--------|----------------------|------|------------------|-------------------|-------------------|-------------|
| 峰 #    | 保留时间 [min]           | 类型   | 峰宽 [min]         | 峰面积 [mAU*s]       | 峰高 [mAU]          | 峰面积 %       |
| 1      | 15.358               | BV   | 0.3473           | 1.59259e4         | 700.38245         | 13.2333     |
| 2      | 17.291               | VB   | 0.4026           | 1.61540e4         | 612.73016         | 13.4229     |
| 3      | 24.481               | BV   | 0.6299           | 4.43037e4         | 1050.79602        | 36.8133     |
| 4      | 26.659               | VB   | 0.6470           | 4.39634e4         | 953.41357         | 36.5306     |

### Bioreduction of **6g** with LfSDR1

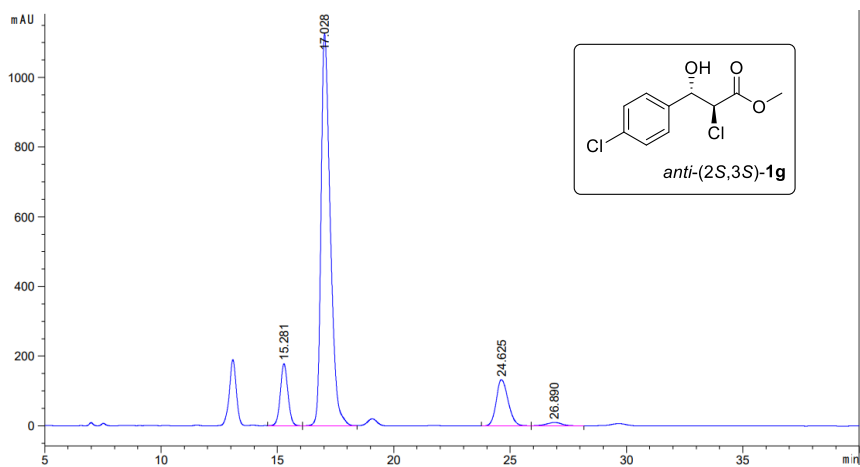

| peak # | retention time [min] | type | peak width [min] | peak area [mAU*s] | peak height [mAU] | peak area % |
|--------|----------------------|------|------------------|-------------------|-------------------|-------------|
| 峰 #    | 保留时间 [min]           | 类型   | 峰宽 [min]         | 峰面积 [mAU*s]       | 峰高 [mAU]          | 峰面积 %       |
| 1      | 15.281               | VB   | 0.3464           | 4014.33447        | 177.78088         | 9.9796      |
| 2      | 17.028               | BV   | 0.4173           | 3.10321e4         | 1126.63416        | 77.1455     |
| 3      | 24.624               | BB   | 0.5425           | 4721.07178        | 132.89282         | 11.7365     |
| 4      | 26.890               | BB   | 0.6722           | 457.92252         | 9.79846           | 1.1384      |

### Reduction of **6h** with NaBH<sub>4</sub>

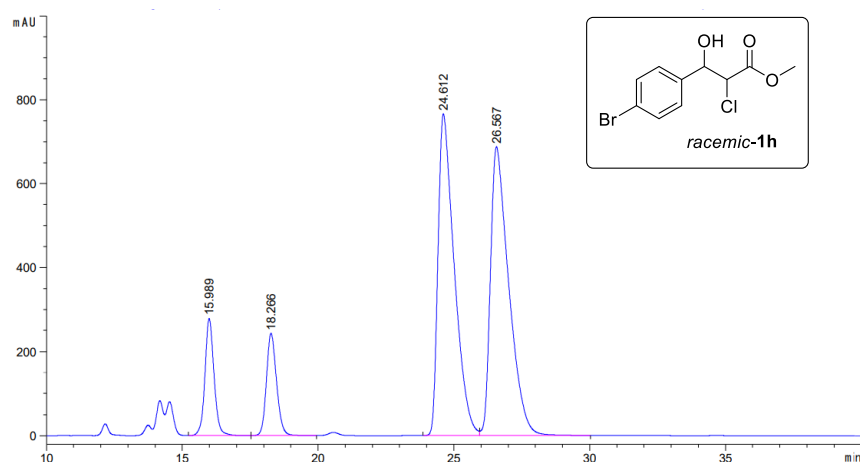

| peak # | retention time [min] | type | peak width [min] | peak area [mAU*s] | peak height [mAU] | peak area % |
|--------|----------------------|------|------------------|-------------------|-------------------|-------------|
| 峰 #    | 保留时间 [min]           | 类型   | 峰宽 [min]         | 峰面积 [mAU*s]       | 峰高 [mAU]          | 峰面积 %       |
| 1      | 15.989               | BB   | 0.3533           | 6470.24512        | 277.72186         | 8.4360      |
| 2      | 18.266               | BB   | 0.3961           | 6270.76123        | 242.68399         | 8.1759      |
| 3      | 24.612               | BV   | 0.6175           | 3.17420e4         | 765.91992         | 41.3857     |
| 4      | 26.567               | VB   | 0.6968           | 3.22148e4         | 687.32001         | 42.0023     |

### Bioreduction of **6h** with LfSDR1

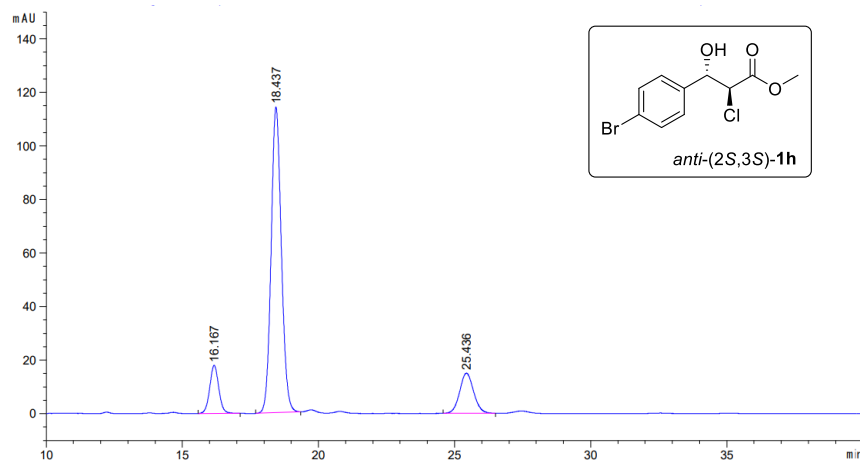

| peak # | retention time [min] | type | peak width [min] | peak area [mAU*s] | peak height [mAU] | peak area % |
|--------|----------------------|------|------------------|-------------------|-------------------|-------------|
| 峰 #    | 保留时间 [min]           | 类型   | 峰宽 [min]         | 峰面积 [mAU*s]       | 峰高 [mAU]          | 峰面积 %       |
| 1      | 16.167               | BV R | 0.3579           | 415.06476         | 17.99698          | 10.5842     |
| 2      | 18.437               | BB   | 0.4013           | 2972.17798        | 114.16785         | 75.7912     |
| 3      | 25.436               | BB   | 0.5363           | 534.28949         | 15.00258          | 13.6245     |

### Reduction of **6i** with NaBH<sub>4</sub>

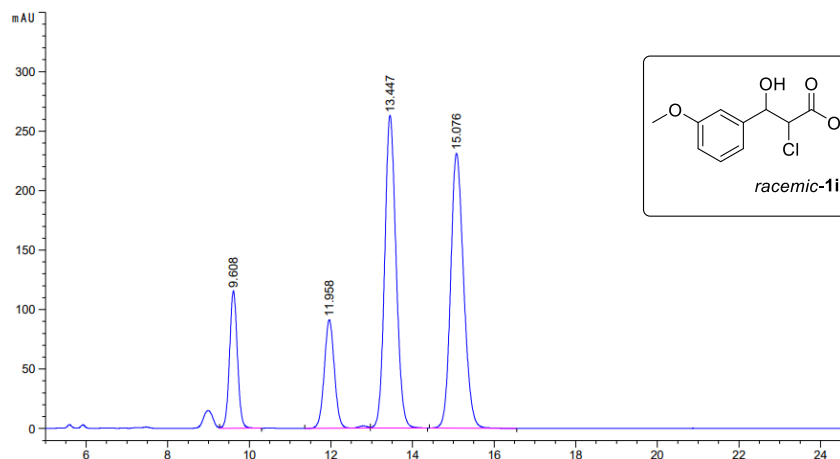

| peak # | retention time [min] | type | peak width [min] | peak area [mAU*s] | peak height [mAU] | peak area % |
|--------|----------------------|------|------------------|-------------------|-------------------|-------------|
| 峰 #    | 保留时间 [min]           | 类型   | 峰宽 [min]         | 峰面积 [mAU*s]       | 峰高 [mAU]          | 峰面积 %       |
| 1      | 9.608                | VB   | 0.2067           | 1542.30957        | 115.53669         | 11.5715     |
| 2      | 11.958               | BV R | 0.2666           | 1602.24683        | 91.15568          | 12.0212     |
| 3      | 13.447               | VB   | 0.2983           | 5082.35938        | 262.98462         | 38.1316     |
| 4      | 15.076               | BB   | 0.3391           | 5101.55859        | 231.06401         | 38.2756     |

### Bioreduction of **6i** with LfSDR1

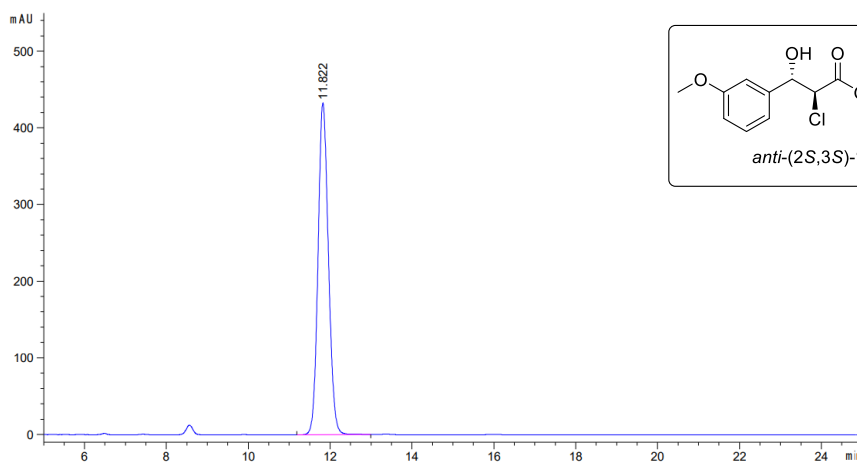

| peak # | retention time [min] | type | peak width [min] | peak area [mAU*s] | peak height [mAU] | peak area % |
|--------|----------------------|------|------------------|-------------------|-------------------|-------------|
| 峰 #    | 保留时间 [min]           | 类型   | 峰宽 [min]         | 峰面积 [mAU*s]       | 峰高 [mAU]          | 峰面积 %       |
| 1      | 11.822               | BV R | 0.2727           | 7630.19531        | 432.78909         | 100.0000    |

### Reduction of **6j** with NaBH<sub>4</sub>

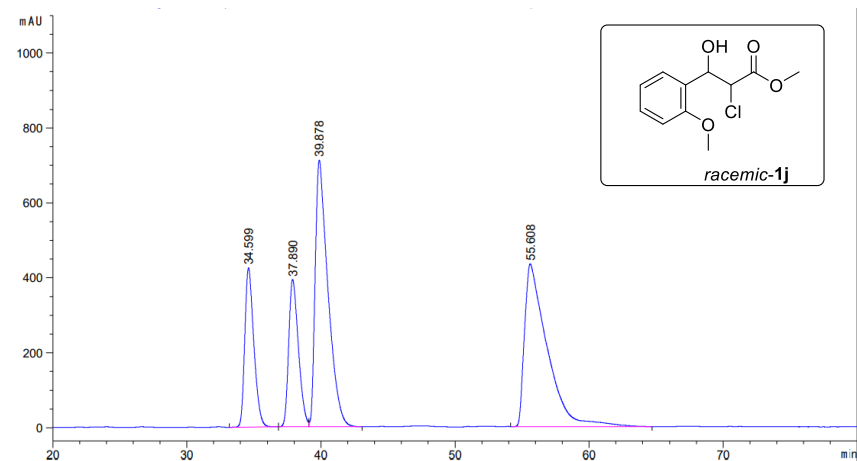

| peak # | retention time [min] | type | peak width [min] | peak area [mAU*s] | peak height [mAU] | peak area % |
|--------|----------------------|------|------------------|-------------------|-------------------|-------------|
| 峰 #    | 保留时间 [min]           | 类型   | 峰宽 [min]         | 峰面积 [mAU*s]       | 峰高 [mAU]          | 峰面积 %       |
| 1      | 34.598               | BB   | 0.7194           | 1.99956e4         | 425.39532         | 14.6469     |
| 2      | 37.889               | BV   | 0.7799           | 1.98363e4         | 392.94656         | 14.5302     |
| 3      | 39.877               | VB   | 0.9377           | 4.70158e4         | 711.67230         | 34.4394     |
| 4      | 55.606               | BB   | 1.6332           | 4.96698e4         | 433.67389         | 36.3835     |

### Bioreduction of **6j** with LfSDR1

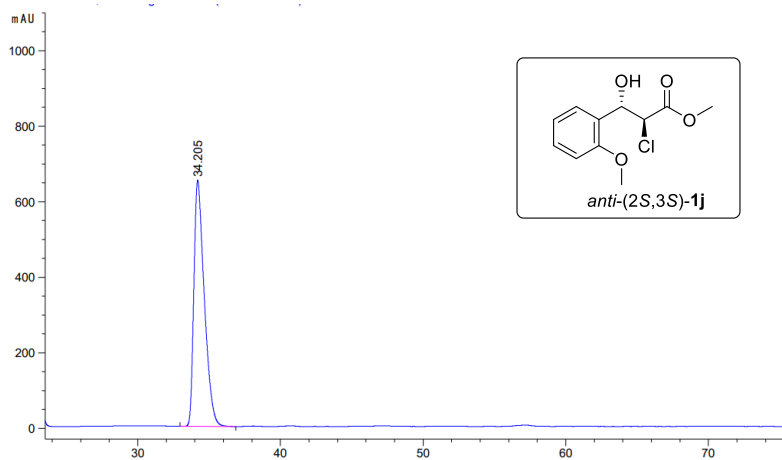

| peak # | retention time [min] | type | peak width [min] | peak area [mAU*s] | peak height [mAU] | peak area % |
|--------|----------------------|------|------------------|-------------------|-------------------|-------------|
| 峰 #    | 保留时间 [min]           | 类型   | 峰宽 [min]         | 峰面积 [mAU*s]       | 峰高 [mAU]          | 峰面积 %       |
| 1      | 34.205               | BB   | 0.7651           | 3.31251e4         | 651.63519         | 100.0000    |

### Reduction of **6k** with NaBH<sub>4</sub>

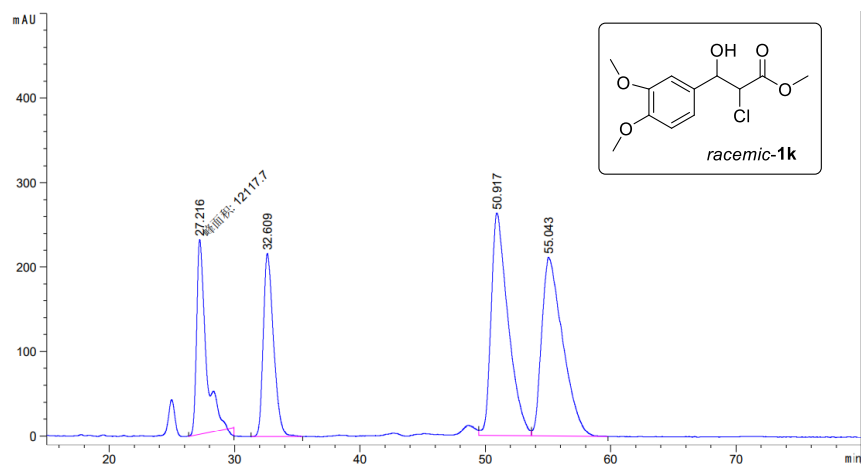

| peak # | retention time [min] | type | peak width [min] | peak area [mAU*s] | peak height [mAU] | peak area % |
|--------|----------------------|------|------------------|-------------------|-------------------|-------------|
| 峰 #    | 保留时间 [min]           | 类型   | 峰宽 [min]         | 峰面积 [mAU*s]       | 峰高 [mAU]          | 峰面积 %       |
| 1      | 27.216               | MM   | 0.8754           | 1.21177e4         | 230.70847         | 16.3482     |
| 2      | 32.609               | BB   | 0.8680           | 1.23436e4         | 216.87788         | 16.6529     |
| 3      | 50.917               | VV   | 1.2872           | 2.49090e4         | 263.42102         | 33.6051     |
| 4      | 55.043               | VB   | 1.5876           | 2.47525e4         | 211.77254         | 33.3939     |

### Bioreduction of **6k** with LfSDR1

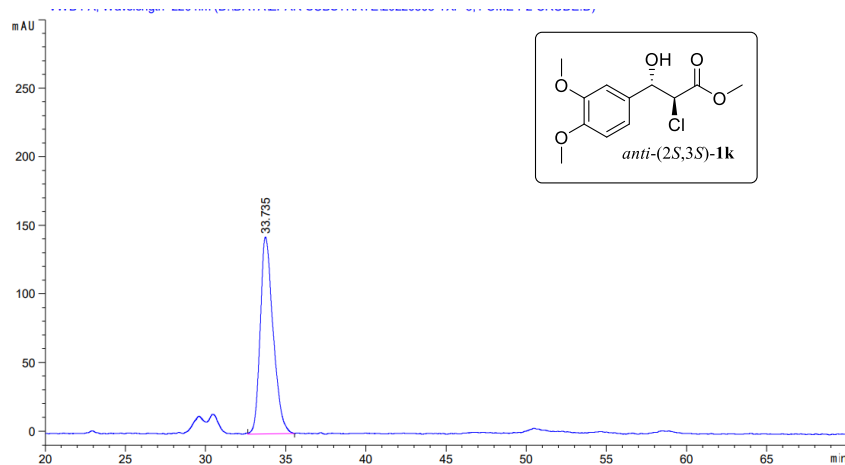

| peak # | retention time [min] | type | peak width [min] | peak area [mAU*s] | peak height [mAU] | peak area % |
|--------|----------------------|------|------------------|-------------------|-------------------|-------------|
| 峰 #    | 保留时间 [min]           | 类型   | 峰宽 [min]         | 峰面积 [mAU*s]       | 峰高 [mAU]          | 峰面积 %       |
| 1      | 33.735               | VV   | 0.8027           | 7987.49902        | 143.21753         | 100.0000    |



## Reduction of **61** with NaBH<sub>4</sub>

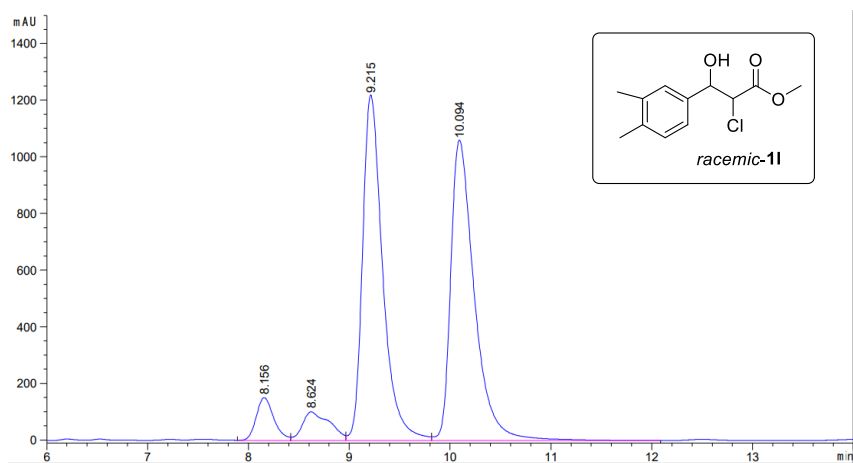

| peak # | retention time [min] | type | peak width [min] | peak area [mAU*s] | peak height [mAU] | peak area % |
|--------|----------------------|------|------------------|-------------------|-------------------|-------------|
| 1      | 8.155                | BV   | 0.1854           | 1825.04822        | 150.60562         | 4.8188      |
| 2      | 8.620                | VV   | 0.2565           | 1881.33569        | 100.46745         | 4.9674      |
| 3      | 9.213                | VV   | 0.2101           | 1.69439e4         | 1219.62000        | 44.7377     |
| 4      | 10.091               | VB   | 0.2457           | 1.72236e4         | 1059.49792        | 45.4762     |

## Bioreduction of **61** with LfSDR1

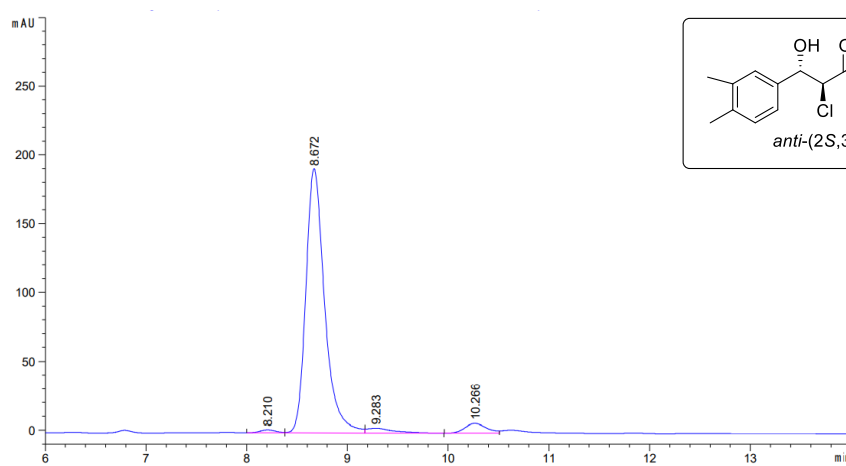

| peak # | retention time [min] | type | peak width [min] | peak area [mAU*s] | peak height [mAU] | peak area % |
|--------|----------------------|------|------------------|-------------------|-------------------|-------------|
| 1      | 8.209                | BV   | 0.1666           | 22.58586          | 2.11511           | 0.8456      |
| 2      | 8.671                | VV   | 0.1958           | 2480.11890        | 191.93584         | 92.8523     |
| 3      | 9.285                | VB   | 0.2610           | 64.44640          | 3.46542           | 2.4128      |
| 4      | 10.265               | BV   | 0.2273           | 103.88685         | 6.99180           | 3.8894      |

### Reduction of **6m** with NaBH<sub>4</sub>

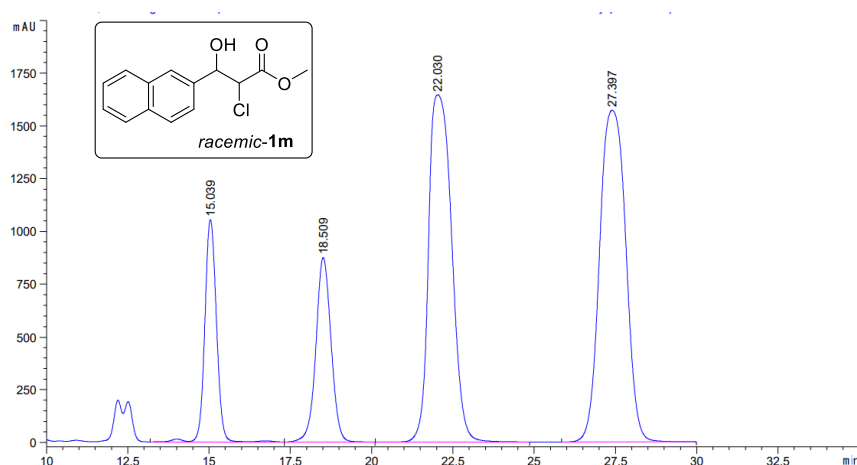

| peak # | retention time [min] | type | peak width [min] | peak area [mAU*s] | peak height [mAU] | peak area % |
|--------|----------------------|------|------------------|-------------------|-------------------|-------------|
| 峰 #    | 保留时间 [min]           | 类型   | 峰宽 [min]         | 峰面积 [mAU*s]       | 峰高 [mAU]          | 峰面积 %       |
| 1      | 15.039               | VV R | 0.3835           | 2.63330e4         | 1053.73193        | 11.7999     |
| 2      | 18.509               | BB   | 0.5008           | 2.83531e4         | 873.84961         | 12.7051     |
| 3      | 22.030               | VB R | 0.7852           | 8.07895e4         | 1646.06580        | 36.2019     |
| 4      | 27.397               | BBA  | 0.8984           | 8.76879e4         | 1571.88257        | 39.2931     |

### Bioreduction of **6m** with LfSDR1

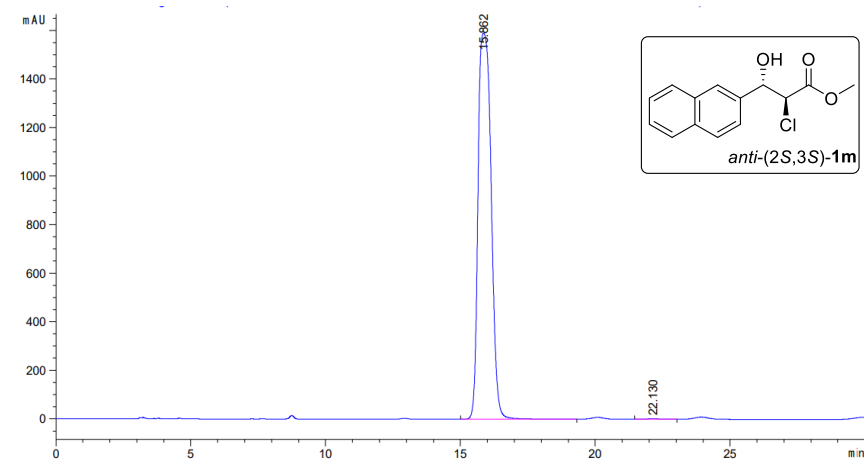

| peak # | retention time [min] | type | peak width [min] | peak area [mAU*s] | peak height [mAU] | peak area % |
|--------|----------------------|------|------------------|-------------------|-------------------|-------------|
| 峰 #    | 保留时间 [min]           | 类型   | 峰宽 [min]         | 峰面积 [mAU*s]       | 峰高 [mAU]          | 峰面积 %       |
| 1      | 15.862               | BB   | 0.5414           | 5.35530e4         | 1590.35059        | 99.8874     |
| 2      | 22.130               | BB   | 0.4347           | 60.36330          | 2.01071           | 0.1126      |

### Reduction of **6n** with NaBH<sub>4</sub>

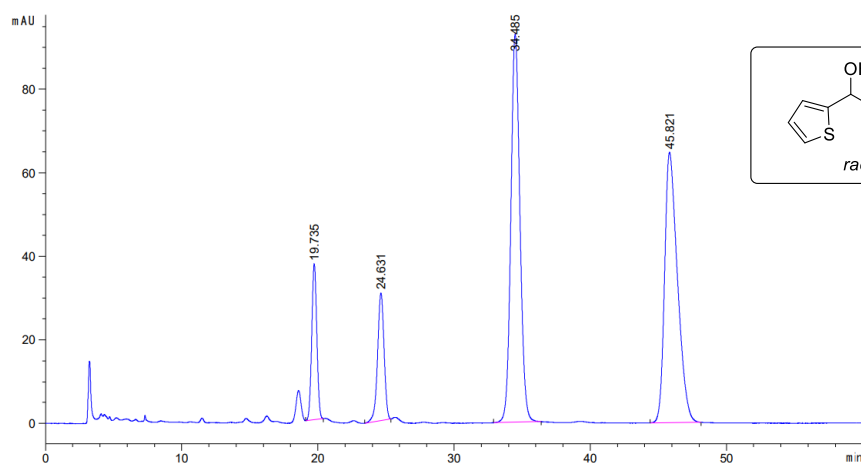

| peak # | retention time [min] | type | peak width [min] | peak area [mAU*s] | peak height [mAU] | peak area % |
|--------|----------------------|------|------------------|-------------------|-------------------|-------------|
| 峰 #    | 保留时间 [min]           | 类型   | 峰宽 [min]         | 峰面积 [mAU*s]       | 峰高 [mAU]          | 峰面积 %       |
| 1      | 19.735               | BB   | 0.3996           | 970.78253         | 37.32142          | 9.2264      |
| 2      | 24.631               | BB   | 0.5120           | 1013.59015        | 30.57279          | 9.6333      |
| 3      | 34.485               | BB   | 0.7063           | 4293.54834        | 92.96152          | 40.8064     |
| 4      | 45.821               | BB   | 0.9569           | 4243.82910        | 64.74166          | 40.3339     |

### Bioreduction of **6n** with LfSDR1

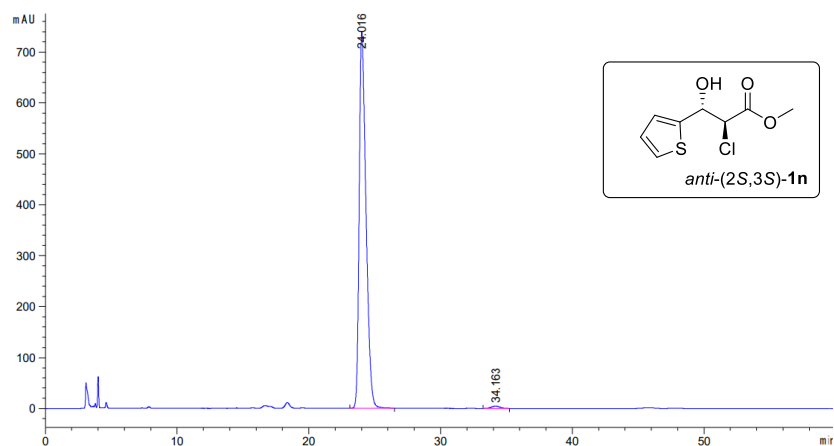

| peak # | retention time [min] | type | peak width [min] | peak area [mAU*s] | peak height [mAU] | peak area % |
|--------|----------------------|------|------------------|-------------------|-------------------|-------------|
| 峰 #    | 保留时间 [min]           | 类型   | 峰宽 [min]         | 峰面积 [mAU*s]       | 峰高 [mAU]          | 峰面积 %       |
| 1      | 24.016               | BB   | 0.5444           | 2.64497e4         | 738.68207         | 99.2641     |
| 2      | 34.163               | BB   | 0.5429           | 196.07498         | 4.40250           | 0.7359      |

### Reduction of **6o** with NaBH<sub>4</sub>

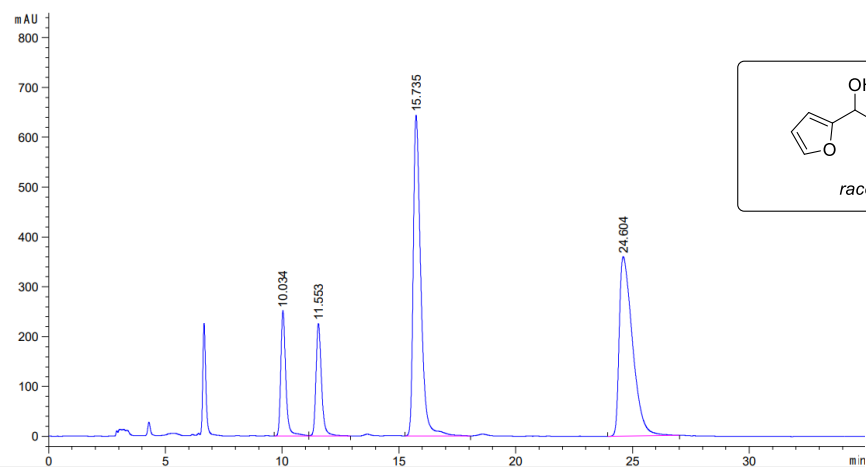

| peak # | retention time [min] | type | peak width [min] | peak area [mAU*s] | peak height [mAU] | peak area % |
|--------|----------------------|------|------------------|-------------------|-------------------|-------------|
| 峰 #    | 保留时间 [min]           | 类型   | 峰宽 [min]         | 峰面积 [mAU*s]       | 峰高 [mAU]          | 峰面积 %       |
| 1      | 10.034               | BV   | 0.2266           | 3764.34277        | 251.52634         | 10.3991     |
| 2      | 11.553               | VB   | 0.2499           | 3693.17749        | 225.67656         | 10.2025     |
| 3      | 15.735               | BV   | 0.3398           | 1.44969e4         | 643.65771         | 40.0481     |
| 4      | 24.604               | BB   | 0.6141           | 1.42443e4         | 360.44290         | 39.3503     |

### Bioreduction of **6o** with LfSDR1

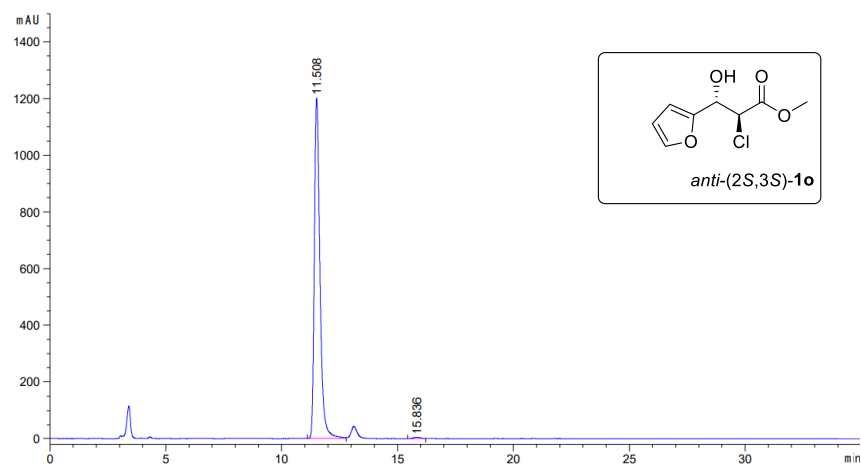

| peak # | retention time [min] | type | peak width [min] | peak area [mAU*s] | peak height [mAU] | peak area % |
|--------|----------------------|------|------------------|-------------------|-------------------|-------------|
| 峰 #    | 保留时间 [min]           | 类型   | 峰宽 [min]         | 峰面积 [mAU*s]       | 峰高 [mAU]          | 峰面积 %       |
| 1      | 11.508               | VV   | 0.2552           | 2.02192e4         | 1202.48682        | 99.5425     |
| 2      | 15.836               | BB   | 0.2979           | 92.93533          | 4.86445           | 0.4575      |
